# Supplementary material for: Diastereoselective intramolecular aldol ring closures of threonine derivatives leading to densely functionalised pyroglutamates related to oxazolomycin
Source: Royal Society of Chemistry journal article supplement (doi:10.1039/c4ra01967a), 2014-01-01
Supplement: c4ra01967a1.pdf [file c4ra01967a1.pdf]

Diastereoselective Intramolecular Aldol Ring Closures of Threonine  
Derivatives Leading to Densely Functionalised Pyroglutamates  
Related to Oxazolomycin

Elizabeth A. Heaviside, Mark G. Moloney\* and Amber L. Thompson

Department of Chemistry, Chemistry Research Laboratory, The  
University of Oxford, 12 Mansfield Road, Oxford. OX1 3TA.

4a

Instrument DQX400  
Chemist BH  
Group MGM  
BH3144

h1acq.au CDCl3 {C:NMR} mgmgrp 36

NMRO@CHEM.OX

NAME Jul23-2010-36  
EXPNO 1  
PROCNO 1  
Date\_ 20100723  
Time\_ 15.35  
INSTRUM av400  
PROBHD 5 mm QNP 1H/13  
PULPROG zg60  
TD 65536  
SOLVENT CDCl3  
NS 16  
DS 2  
SWH 8278.146 Hz  
FIDRES 0.126314 Hz  
AQ 3.9584243 sec  
RG 90.5  
DW 60.400 usec  
DE 7.50 usec  
TE 300.0 K  
D1 1.0000000 sec

----- CHANNEL f1 -----  
NUC1 1H  
P1 9.00 usec  
PL1 0.00 dB  
SFO1 400.2024714 MHz  
SI 32768  
SF 400.2000028 MHz  
WDW EM  
SSB 0  
LB 0.30 Hz  
GB 0  
PC 1.00

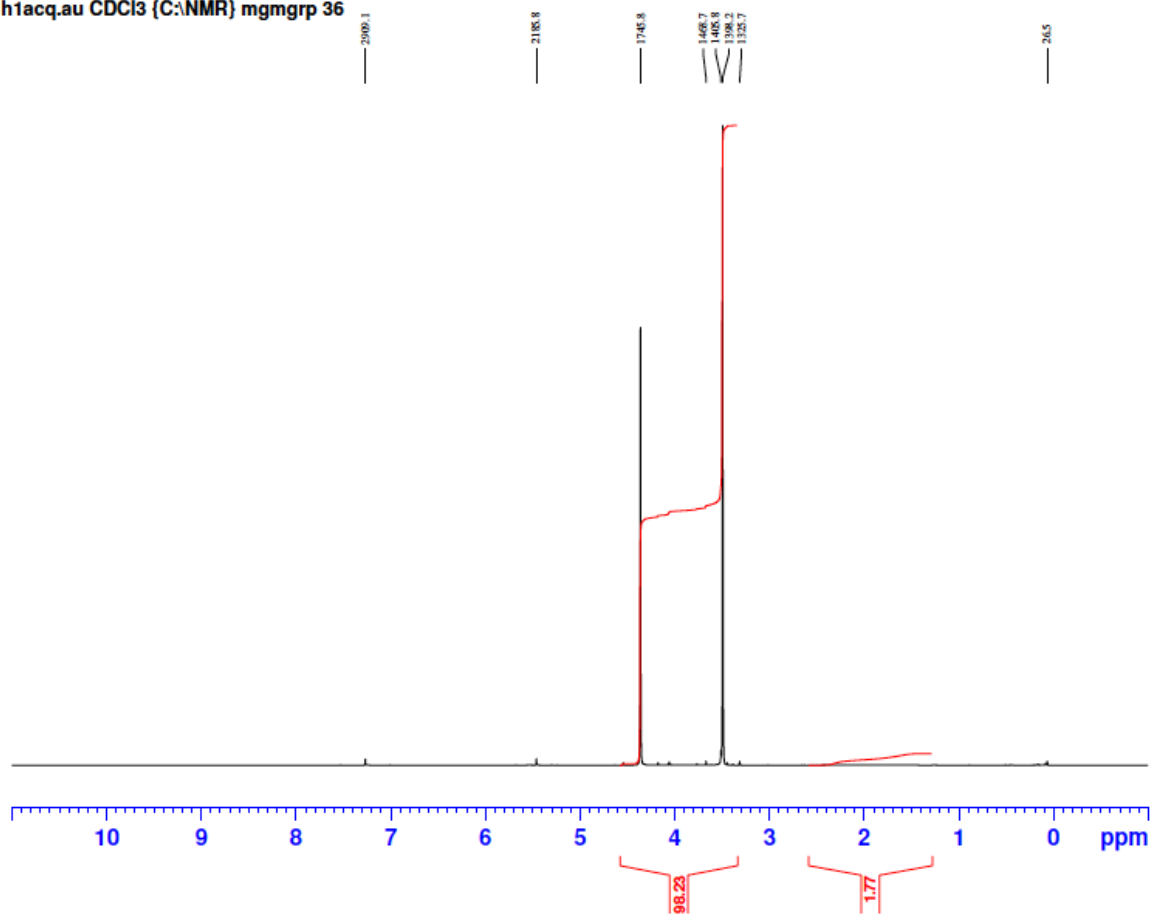

4a

Instrument DQX400  
Chemist BH  
Group MGM  
BH3144  
c13acq.au CDCl3 (C:NMR) mgmgrp 36

NMR@CHEM.OX

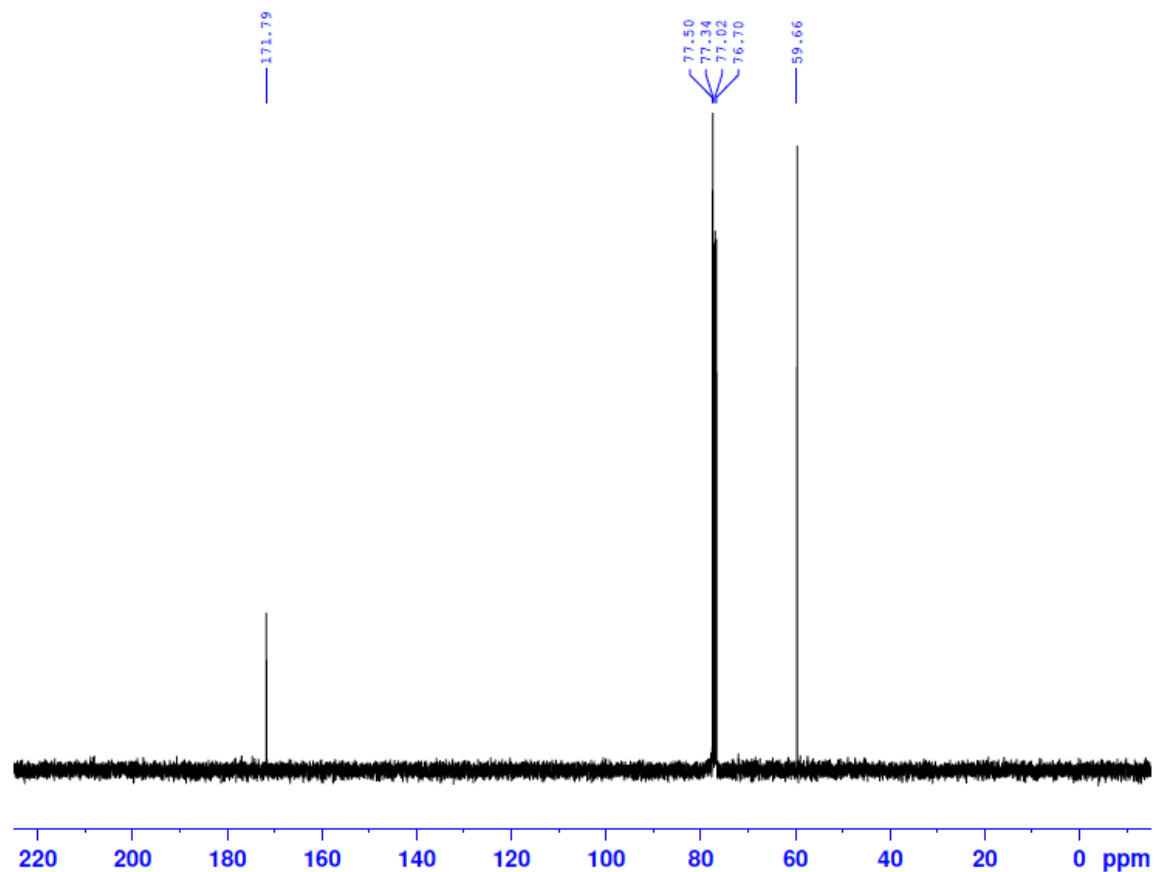

```
NAME      Jul23-2010-36
EXPNO     2
PROCNO    1
Date_     20100723
Time      15.43
INSTRUM   av400
PROBHD    5 mm QNP 1H/13
PULPROG   zgpg30
TD        32768
SOLVENT   CDCl3
NS        256
DS        4
SWH       26178.010 Hz
FIDRES    0.798889 Hz
AQ        0.6259188 sec
RG        32768
DW        19.100 usec
DE        7.50 usec
TE        300.0 K
D1        1.00000000 sec
D11       0.03000000 sec
TDO       1
```

```
----- CHANNEL f1 -----
NUC1      13C
P1        9.50 usec
PL1       0.00 dB
SFO1     100.6403931 MHz
```

```
----- CHANNEL f2 -----
CPDPRG2   waltz16
NUC2      1H
PCPD2     80.00 usec
PL2       0.00 dB
PL12     19.00 dB
PL13     25.00 dB
SFO2     400.2016008 MHz
SI        32768
SF       100.6303718 MHz
WDW       EM
SSB       0
LB        1.00 Hz
GB        0
PC        1.40
```

4b

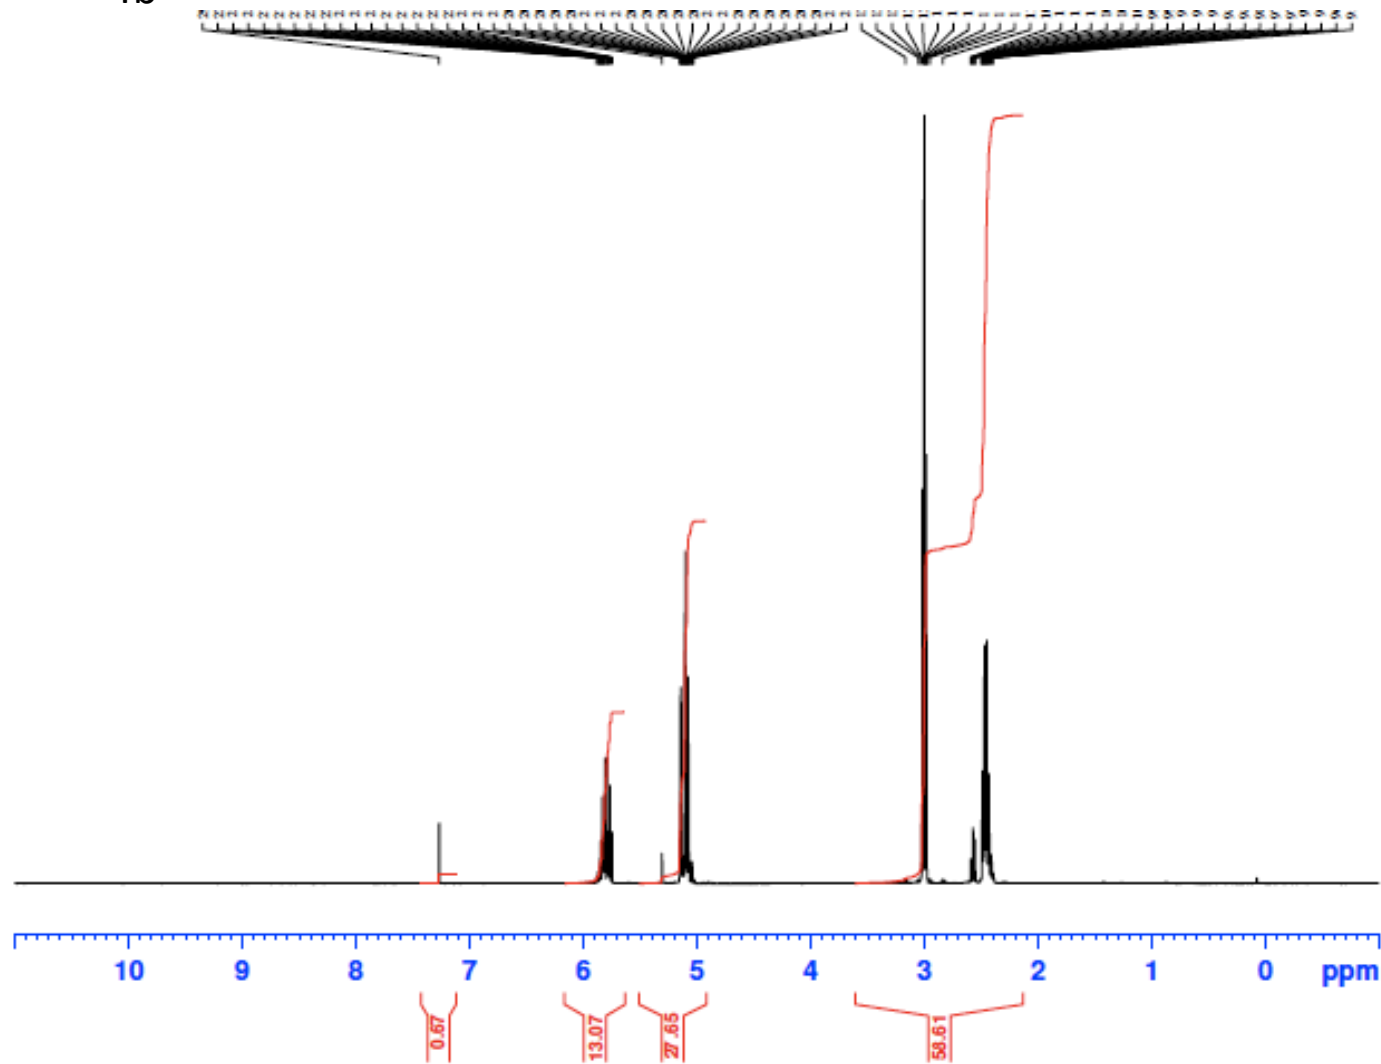

```

NAME      Dec09-2010-19
EXPNO     1
PROCNO    1
Date_     20101210
Time      14.22
INSTRUM   av400
PROBHD    5 mm QNP 1H/13
PULPROG   zg60
TD         65536
SOLVENT   CDC13
NS         16
DS         2
SWH        8278.146 Hz
FIDRES     0.126314 Hz
AQ         3.9584243 sec
RG         128
DW         60.400 usec
DE         7.50 usec
TE         300.0 K
D1         1.00000000 sec
  
```

```

===== CHANNEL f1 =====
NUC1      1H
P1         9.00 usec
PL1        0.00 dB
SFO1      400.2024714 MHz
SI         32768
SF         400.2000028 MHz
WDW        EM
SSB         0
LB         0.30 Hz
GB         0
PC         1.00
  
```

4b

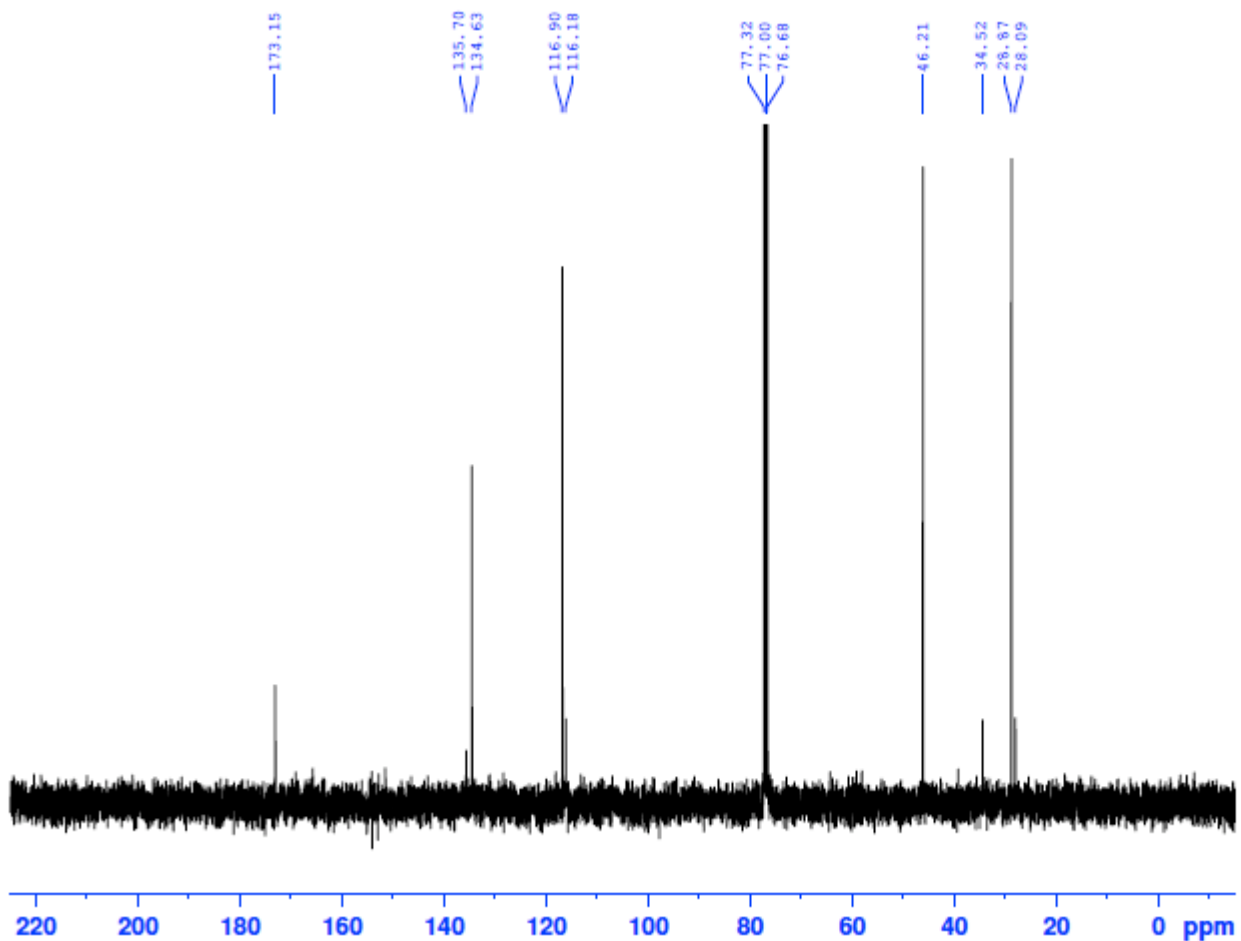

```
NAME          Dec09-2010-19
EXPNO         2
PROCNO       1
Date_        20101210
Time         14.30
INSTRUM      av400
PROBHD       5 mm QNP 1H/13
PULPROG      zgpg30
TD           32768
SOLVENT      CDCl3
NS           256
DS           4
SWH          26178.010 Hz
FIDRES       0.798889 Hz
AQ           0.6259188 sec
RG           32768
DW           19.100 usec
DE           7.50 usec
TE           300.0 K
D1           1.00000000 sec
D11          0.03000000 sec
TD0          1

===== CHANNEL f1 =====
NUC1          13C
P1            9.50 usec
PL1           0.00 dB
SFO1          100.6403931 MHz

===== CHANNEL f2 =====
CPDPRG2      waltz16
NUC2          1H
PCPD2         80.00 usec
PL2           0.00 dB
PL12          19.00 dB
PL13          25.00 dB
SFO2          400.2016008 MHz
SI            32768
SF            100.6303718 MHz
WDW           EM
SSB           0
LB            1.00 Hz
GB            0
PC            1.40
```

4c

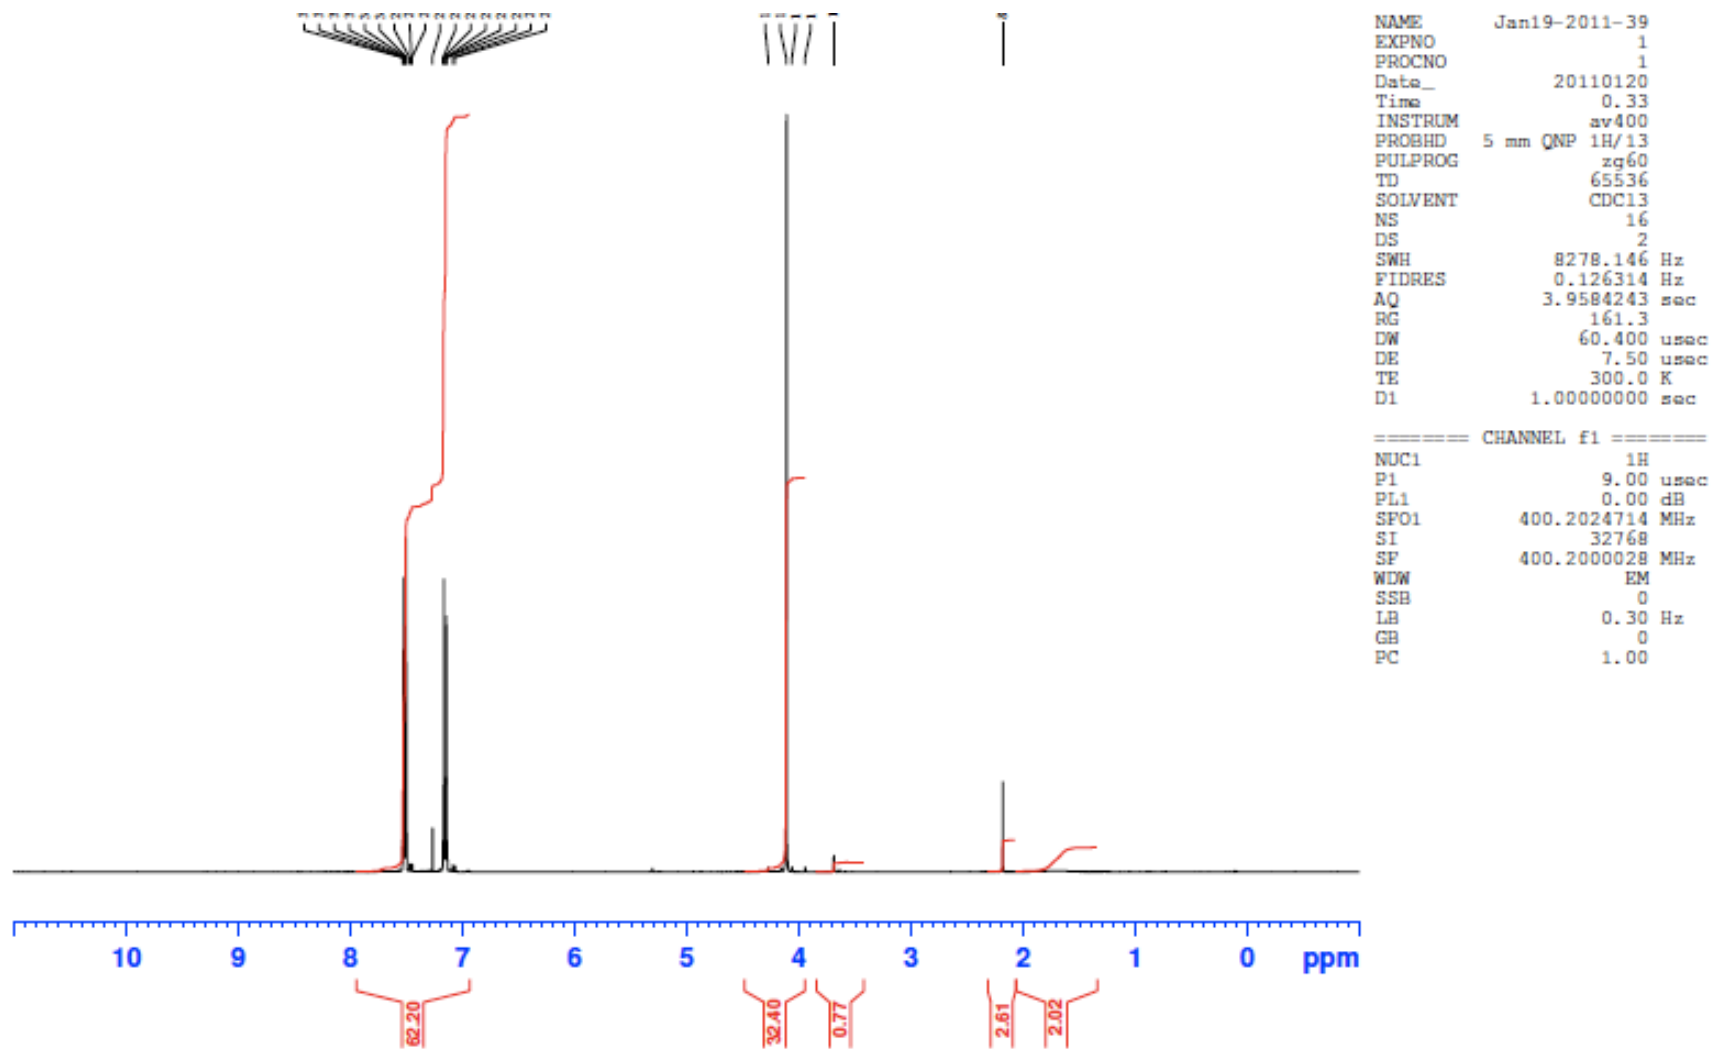

4c

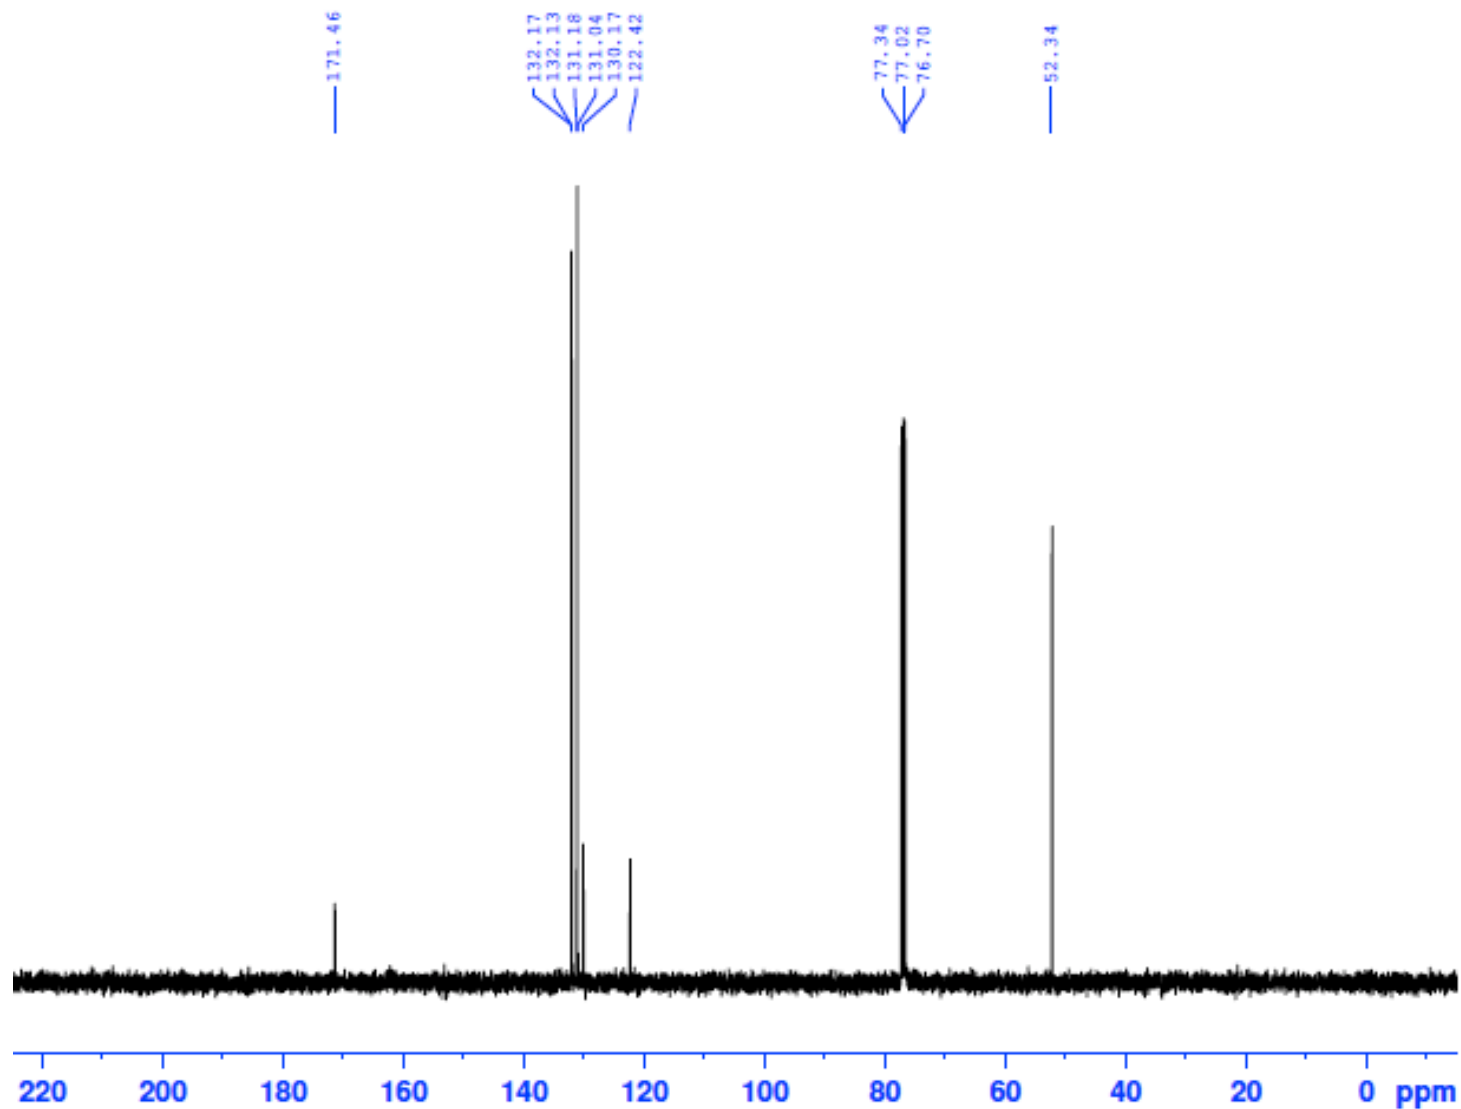

```
NAME Jan19-2011-39
EXPNO 2
PROCNO 1
Date_ 20110120
Time 0.41
INSTRUM av400
PROBHD 5 mm QNP 1H/13
PULPROG zgpg30
TD 32768
SOLVENT CDC13
NS 256
DS 4
SWH 26178.010 Hz
FIDRES 0.798889 Hz
AQ 0.6259188 sec
RG 32768
DW 19.100 usec
DE 7.50 usec
TE 300.0 K
D1 1.00000000 sec
D11 0.03000000 sec
TDO 1
```

```
==== CHANNEL f1 =====
NUC1 13C
P1 9.50 usec
PL1 0.00 dB
SFO1 100.6403931 MHz
```

```
==== CHANNEL f2 =====
CPDPRG2 waltz16
NUC2 1H
PCPD2 80.00 usec
PL2 0.00 dB
PL12 19.00 dB
PL13 25.00 dB
SFO2 400.2016008 MHz
SI 32768
SF 100.6303718 MHz
WDW EM
SSB 0
LB 1.00 Hz
GB 0
PC 1.40
```

5a

Instrument DQX400  
Chemist BH  
Group MGM  
BH3150  
h1acq.au CDC13 (CANMR) mgmgrp 37

NMR@CHEM.OX

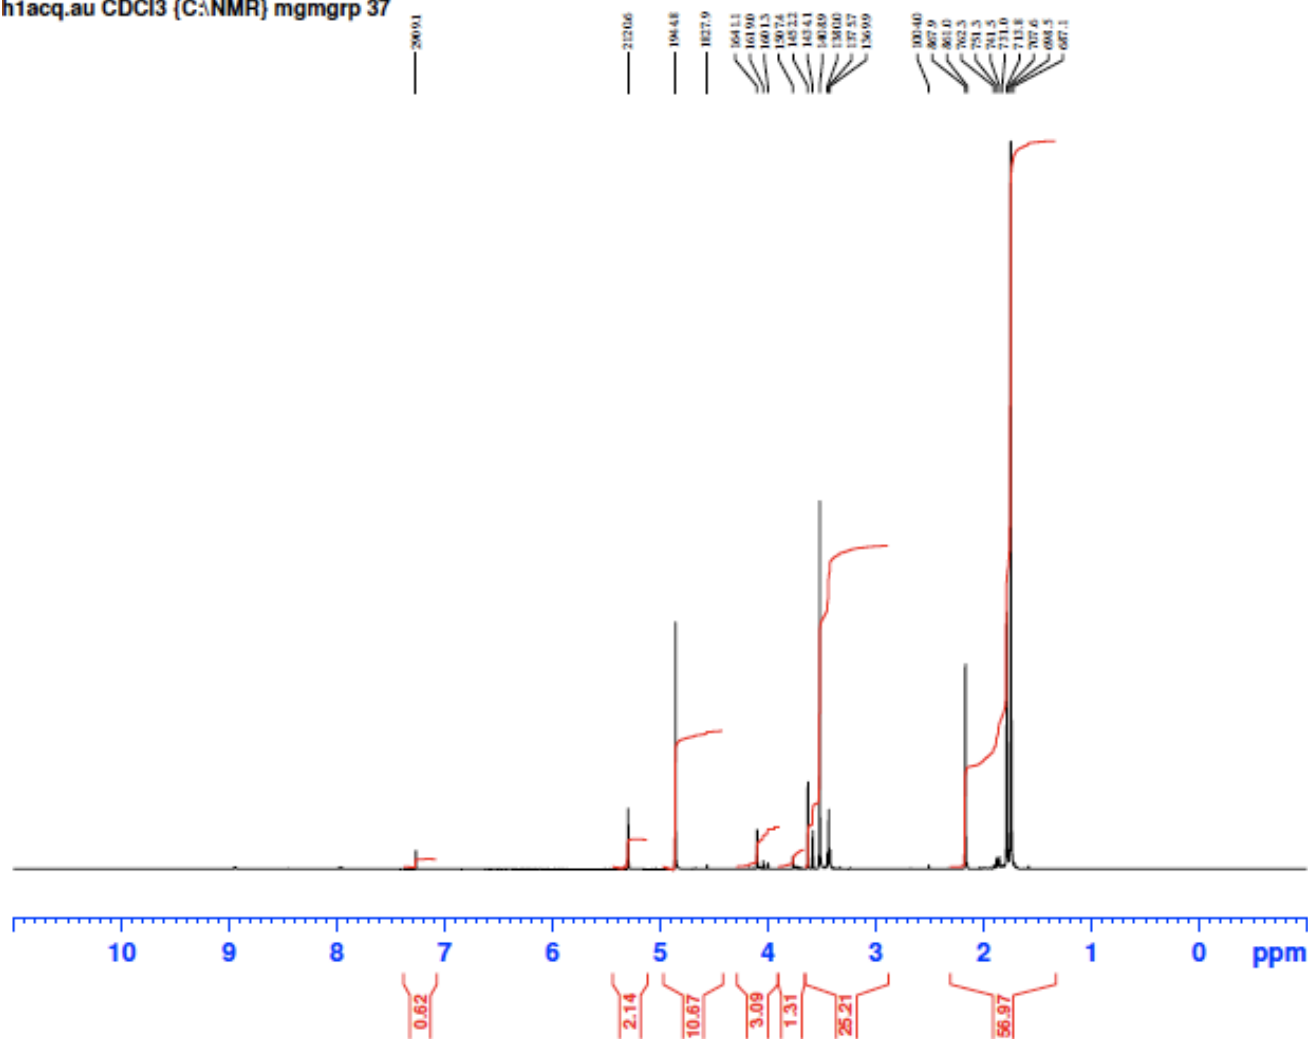

NAME Jul123-2010-36  
EXPNO 6  
PROCNO 1  
Date\_ 20100723  
Time 16.00  
INSTRUM av400  
PROBHD 5 mm QNP 1H/13  
PULPROG zg60  
TD 65536  
SOLVENT CDC13  
NS 16  
DS 2  
SWH 8278.146 Hz  
FIDRES 0.126314 Hz  
AQ 3.9584243 sec  
RG 128  
DW 60.400 usec  
DE 7.50 usec  
TE 300.0 K  
D1 1.00000000 sec

==== CHANNEL f1 =====  
NUC1 1H  
P1 9.00 usec  
PL1 0.00 dB  
SFO1 400.2024714 MHz  
SI 32768  
SF 400.2000028 MHz  
WDW EM  
SSB 0  
LB 0.30 Hz  
GB 0  
PC 1.00



5a

Instrument DQX400  
Chemist BH  
Group MGM  
BH3150  
c13acq.au CDC13 (C:NMR) mgmgrp 37

NMR@CHEM.OX

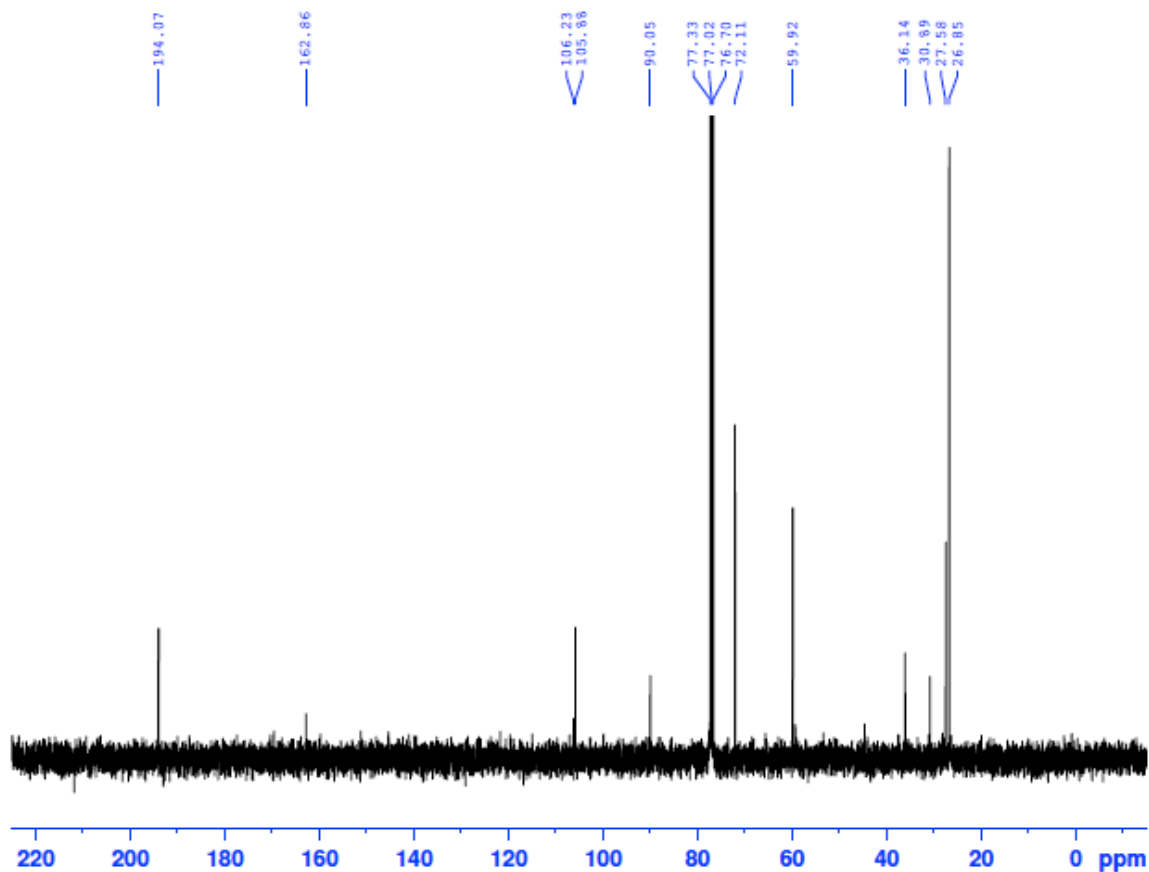

```
NAME      Jul23-2010-36
EXPNO     7
PROCNO    1
Data_     20100723
Time      16.08
INSTRUM   av400
PROBHD    5 mm QNP 1H/13
PULPROG   zgpg30
TD        32768
SOLVENT   CDC13
NS        256
DS        4
SWH       26178.010 Hz
FIDRES    0.798889 Hz
AQ        0.6259188 sec
RG        32768
DW        19.100 usec
DE        7.50 usec
TE        300.0 K
D1        1.00000000 sec
D11       0.03000000 sec
TD0       1

===== CHANNEL f1 =====
NUC1      13C
P1        9.50 usec
PL1       0.00 dB
SFO1     100.6403931 MHz

===== CHANNEL f2 =====
CPDPRG2   waltz16
NUC2      1H
PCPD2     80.00 usec
PL2       0.00 dB
PL12     19.00 dB
PL13     25.00 dB
SFO2     400.2016008 MHz
SI        32768
SF       100.6303718 MHz
WDW       EM
SSB       0
LB        1.00 Hz
GB        0
PC        1.40
```

5b

Instrument DQX400  
Chemist BH  
Group MGM  
BH498

h1acq.au CDCI3 (C:\NMR) mgmgrp.56

NMROCHEM.OX

NAME Dec10-2010-56  
EXPNO 1  
PROCNO 1  
Date\_ 20101211  
Time 4.30  
INSTRUM av400  
PROBHD 5 mm QNP 1H/13  
PULPROG zg60  
TD 65536  
SOLVENT CDCI3  
NS 16  
DS 2  
SWH 8278.146 Hz  
FIDRES 0.126314 Hz  
AQ 3.9584243 sec  
RG 90.5  
DW 60.400 usec  
DE 7.50 usec  
TE 300.0 K  
D1 1.00000000 sec

==== CHANNEL f1 =====  
NUC1 1H  
P1 9.00 usec  
PL1 0.00 dB  
SFO1 400.2024714 MHz  
SI 32768  
SF 400.2000028 MHz  
WDW EM  
SSB 0  
LB 0.30 Hz  
GB 0  
PC 1.00

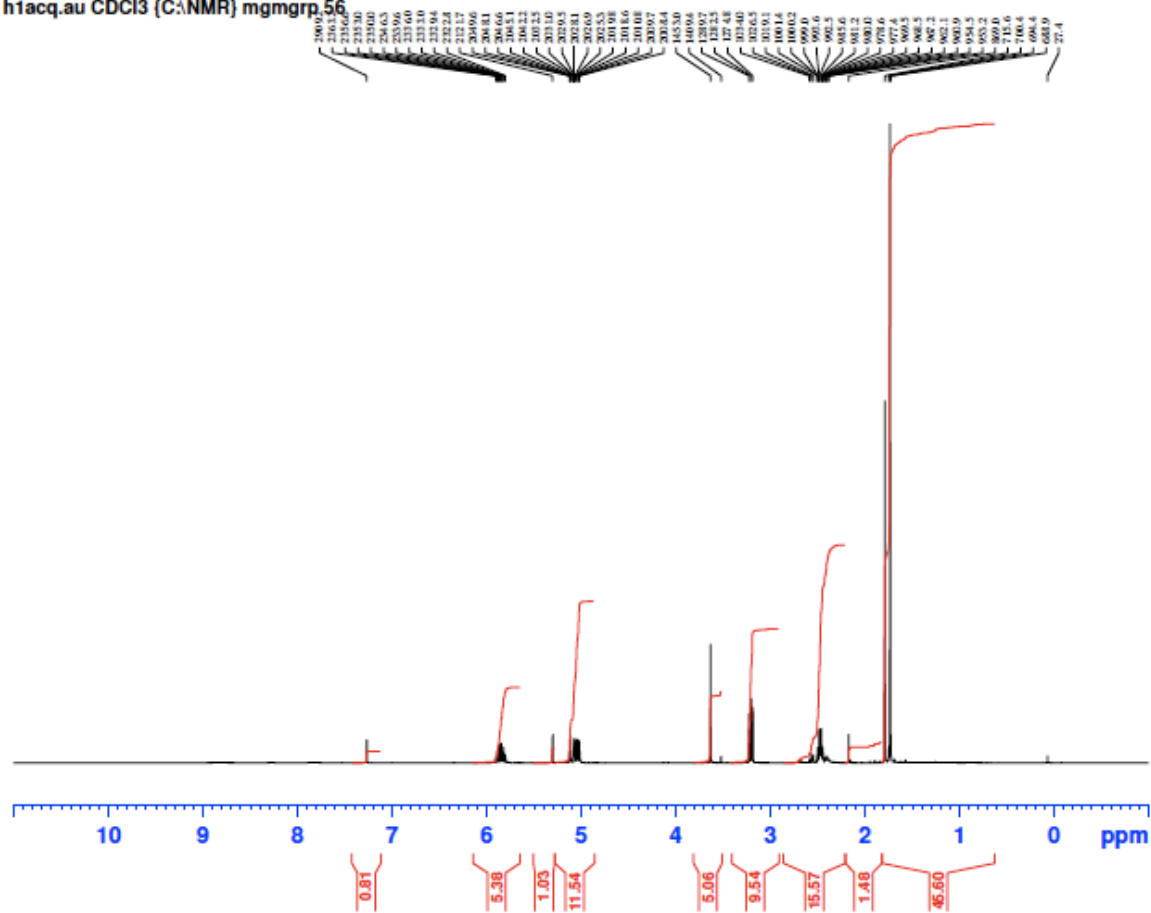

5b

Instrument DQX400  
 Chemist BH  
 Group MGM  
 BH498  
 c13acq.au CDC13 (C:NMR) mgmgrp 56

NMR@CHEM.OX

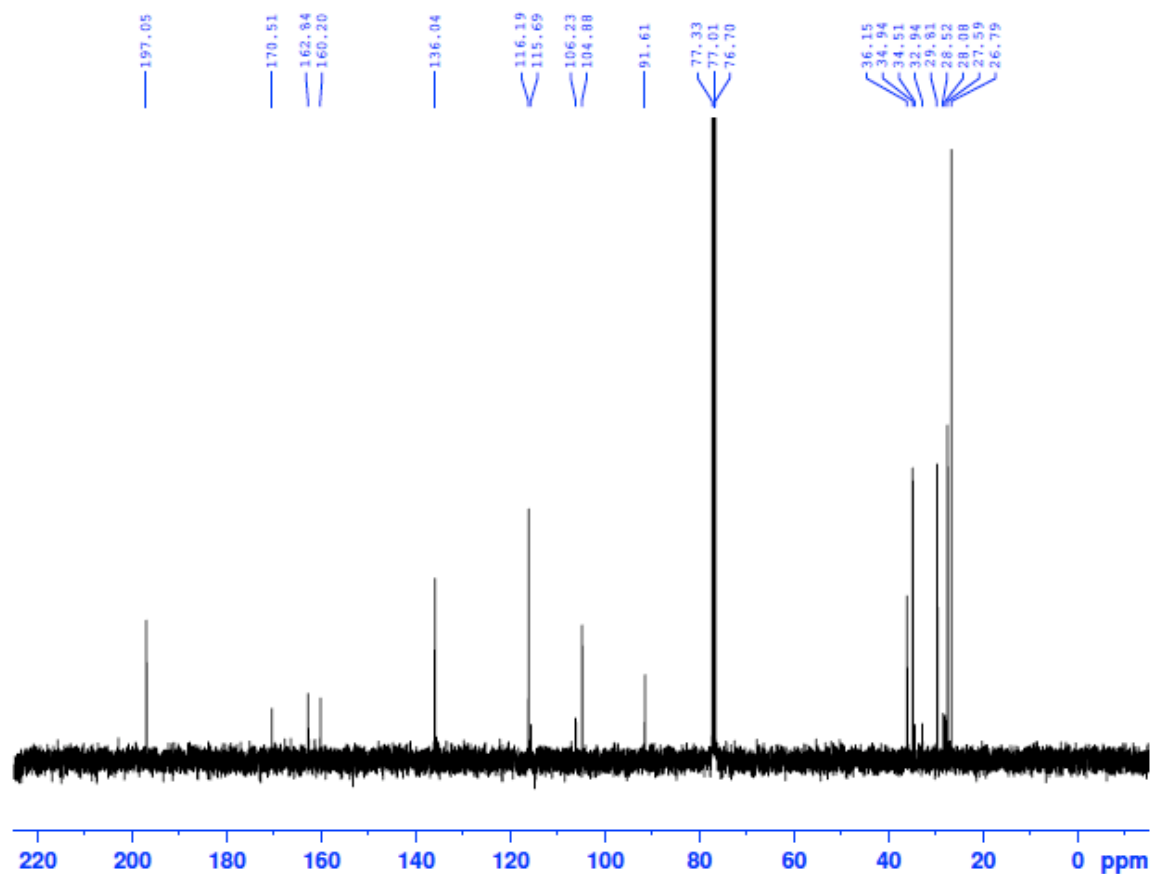

```

NAME      Dec10-2010-56
EXPNO     2
PROCNO    1
Data_     20101211
Time      4.38
INSTRUM   av400
PROBHD    5 mm QNP 1H/13
PULPROG   zgpg30
TD         32768
SOLVENT   CDC13
NS         256
DS         4
SWH        26178.010 Hz
FIDRES    0.798889 Hz
AQ         0.6259188 sec
RG         32768
DW         19.100 usec
DE         7.50 usec
TE         300.0 K
D1         1.00000000 sec
D11        0.03000000 sec
TD0        1
  
```

```

===== CHANNEL f1 =====
NUC1      13C
P1        9.50 usec
PL1       0.00 dB
SFO1     100.6403931 MHz
  
```

```

===== CHANNEL f2 =====
CPDPRG2   waltz16
NUC2       1H
PCPD2     80.00 usec
PL2        0.00 dB
PL12      19.00 dB
PL13      25.00 dB
SFO2     400.2016008 MHz
SI         32768
SF        100.6303718 MHz
WDW        EM
SSB         0
LB         1.00 Hz
GB          0
PC          1.40
  
```



5c

Instrument DQX400  
Chemist BH  
Group MGM  
BH4126  
c13acq.au CDC13 (C:NMR) mgmgrp 52

NMR@CHEM.OX

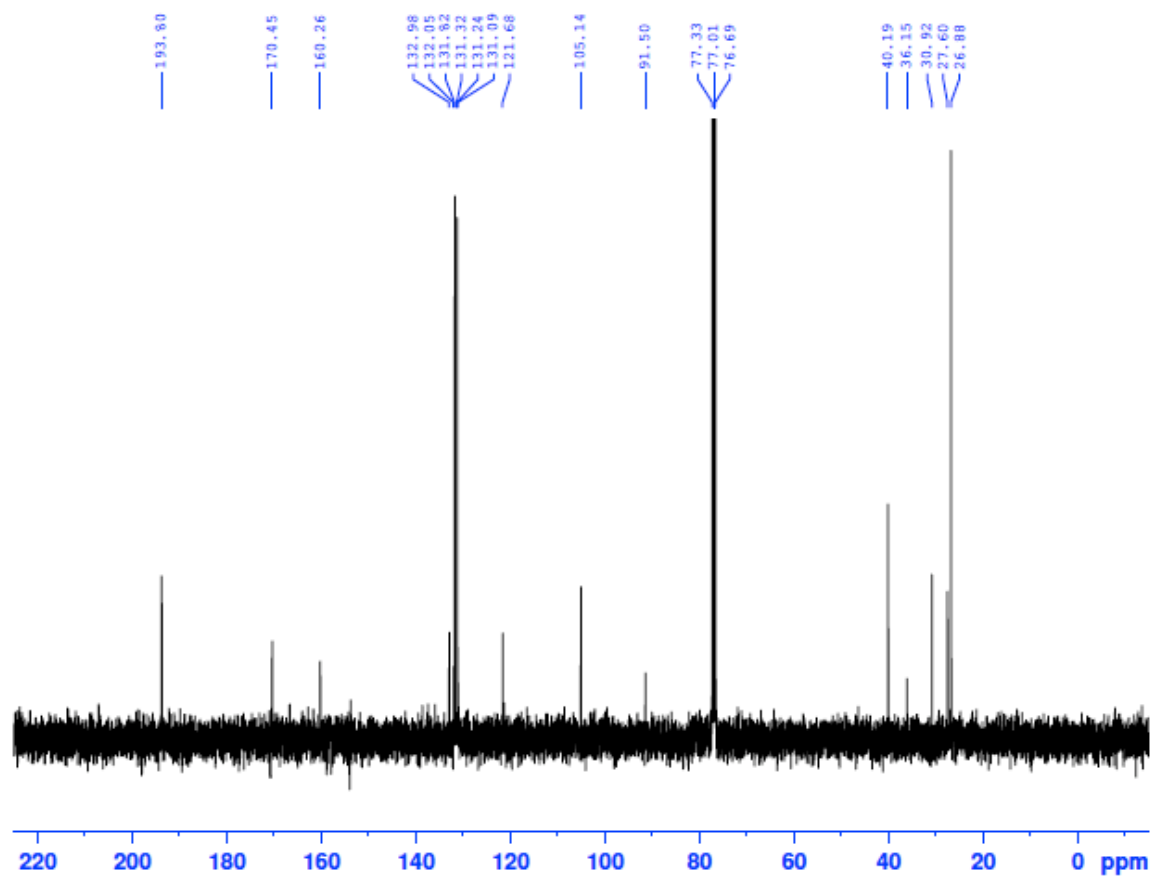

```
NAME      Jan25-2011-52
EXPNO     2
PROCNO    1
Data_     20110126
Time      1.44
INSTRUM   av400
PROBHD    5 mm QNP 1H/13
PULPROG   zgpg30
TD        32768
SOLVENT   CDC13
NS        256
DS        4
SWH       26178.010 Hz
FIDRES    0.798889 Hz
AQ        0.6259188 sec
RG        32768
DW        19.100 usec
DE        7.50 usec
TE        300.0 K
D1        1.00000000 sec
D11       0.03000000 sec
TDO       1

===== CHANNEL f1 =====
NUC1      13C
P1        9.50 usec
PL1       0.00 dB
SFO1     100.6403931 MHz

===== CHANNEL f2 =====
CPDPRG2   waltz16
NUC2      1H
PCPD2     80.00 usec
PL2       0.00 dB
PL12     19.00 dB
PL13     25.00 dB
SFO2     400.2016008 MHz
SI        32768
SF       100.6303718 MHz
WDW       EM
SSB       0
LB        1.00 Hz
GB        0
PC        1.40
```

5d

Instrument DQX400  
Chemist BH  
Group MGM  
BH4138  
h1acq.au CDC13 (C: NMR) mgmgrp 39

NMRCHEM.OX

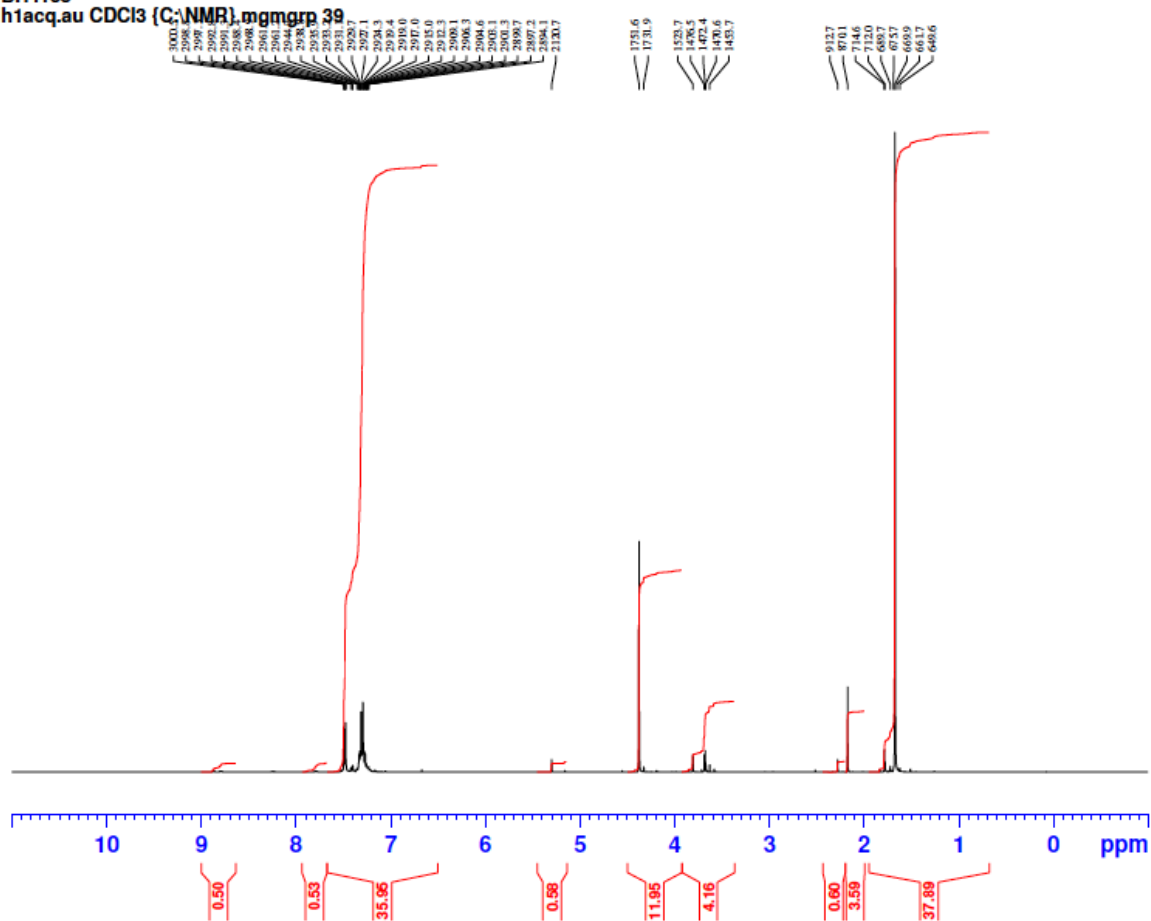

3001.1  
2998  
2996  
2994  
2992  
2990  
2988  
2986  
2984  
2982  
2980  
2978  
2976  
2974  
2972  
2970  
2968  
2966  
2964  
2962  
2960  
2958  
2956  
2954  
2952  
2950  
2948  
2946  
2944  
2942  
2940  
2938  
2936  
2934  
2932  
2930  
2928  
2926  
2924  
2922  
2920  
2918  
2916  
2914  
2912  
2910  
2908  
2906  
2904  
2902  
2900  
2898  
2896  
2894  
2892  
2890  
2888  
2886  
2884  
2882  
2880  
2878  
2876  
2874  
2872  
2870  
2868  
2866  
2864  
2862  
2860  
2858  
2856  
2854  
2852  
2850  
2848  
2846  
2844  
2842  
2840  
2838  
2836  
2834  
2832  
2830  
2828  
2826  
2824  
2822  
2820  
2818  
2816  
2814  
2812  
2810  
2808  
2806  
2804  
2802  
2800  
2798  
2796  
2794  
2792  
2790  
2788  
2786  
2784  
2782  
2780  
2778  
2776  
2774  
2772  
2770  
2768  
2766  
2764  
2762  
2760  
2758  
2756  
2754  
2752  
2750  
2748  
2746  
2744  
2742  
2740  
2738  
2736  
2734  
2732  
2730  
2728  
2726  
2724  
2722  
2720  
2718  
2716  
2714  
2712  
2710  
2708  
2706  
2704  
2702  
2700  
2698  
2696  
2694  
2692  
2690  
2688  
2686  
2684  
2682  
2680  
2678  
2676  
2674  
2672  
2670  
2668  
2666  
2664  
2662  
2660  
2658  
2656  
2654  
2652  
2650  
2648  
2646  
2644  
2642  
2640  
2638  
2636  
2634  
2632  
2630  
2628  
2626  
2624  
2622  
2620  
2618  
2616  
2614  
2612  
2610  
2608  
2606  
2604  
2602  
2600  
2598  
2596  
2594  
2592  
2590  
2588  
2586  
2584  
2582  
2580  
2578  
2576  
2574  
2572  
2570  
2568  
2566  
2564  
2562  
2560  
2558  
2556  
2554  
2552  
2550  
2548  
2546  
2544  
2542  
2540  
2538  
2536  
2534  
2532  
2530  
2528  
2526  
2524  
2522  
2520  
2518  
2516  
2514  
2512  
2510  
2508  
2506  
2504  
2502  
2500  
2498  
2496  
2494  
2492  
2490  
2488  
2486  
2484  
2482  
2480  
2478  
2476  
2474  
2472  
2470  
2468  
2466  
2464  
2462  
2460  
2458  
2456  
2454  
2452  
2450  
2448  
2446  
2444  
2442  
2440  
2438  
2436  
2434  
2432  
2430  
2428  
2426  
2424  
2422  
2420  
2418  
2416  
2414  
2412  
2410  
2408  
2406  
2404  
2402  
2400  
2398  
2396  
2394  
2392  
2390  
2388  
2386  
2384  
2382  
2380  
2378  
2376  
2374  
2372  
2370  
2368  
2366  
2364  
2362  
2360  
2358  
2356  
2354  
2352  
2350  
2348  
2346  
2344  
2342  
2340  
2338  
2336  
2334  
2332  
2330  
2328  
2326  
2324  
2322  
2320  
2318  
2316  
2314  
2312  
2310  
2308  
2306  
2304  
2302  
2300  
2298  
2296  
2294  
2292  
2290  
2288  
2286  
2284  
2282  
2280  
2278  
2276  
2274  
2272  
2270  
2268  
2266  
2264  
2262  
2260  
2258  
2256  
2254  
2252  
2250  
2248  
2246  
2244  
2242  
2240  
2238  
2236  
2234  
2232  
2230  
2228  
2226  
2224  
2222  
2220  
2218  
2216  
2214  
2212  
2210  
2208  
2206  
2204  
2202  
2200  
2198  
2196  
2194  
2192  
2190  
2188  
2186  
2184  
2182  
2180  
2178  
2176  
2174  
2172  
2170  
2168  
2166  
2164  
2162  
2160  
2158  
2156  
2154  
2152  
2150  
2148  
2146  
2144  
2142  
2140  
2138  
2136  
2134  
2132  
2130  
2128  
2126  
2124  
2122  
2120  
2118  
2116  
2114  
2112  
2110  
2108  
2106  
2104  
2102  
2100  
2098  
2096  
2094  
2092  
2090  
2088  
2086  
2084  
2082  
2080  
2078  
2076  
2074  
2072  
2070  
2068  
2066  
2064  
2062  
2060  
2058  
2056  
2054  
2052  
2050  
2048  
2046  
2044  
2042  
2040  
2038  
2036  
2034  
2032  
2030  
2028  
2026  
2024  
2022  
2020  
2018  
2016  
2014  
2012  
2010  
2008  
2006  
2004  
2002  
2000  
1998  
1996  
1994  
1992  
1990  
1988  
1986  
1984  
1982  
1980  
1978  
1976  
1974  
1972  
1970  
1968  
1966  
1964  
1962  
1960  
1958  
1956  
1954  
1952  
1950  
1948  
1946  
1944  
1942  
1940  
1938  
1936  
1934  
1932  
1930  
1928  
1926  
1924  
1922  
1920  
1918  
1916  
1914  
1912  
1910  
1908  
1906  
1904  
1902  
1900  
1898  
1896  
1894  
1892  
1890  
1888  
1886  
1884  
1882  
1880  
1878  
1876  
1874  
1872  
1870  
1868  
1866  
1864  
1862  
1860  
1858  
1856  
1854  
1852  
1850  
1848  
1846  
1844  
1842  
1840  
1838  
1836  
1834  
1832  
1830  
1828  
1826  
1824  
1822  
1820  
1818  
1816  
1814  
1812  
1810  
1808  
1806  
1804  
1802  
1800  
1798  
1796  
1794  
1792  
1790  
1788  
1786  
1784  
1782  
1780  
1778  
1776  
1774  
1772  
1770  
1768  
1766  
1764  
1762  
1760  
1758  
1756  
1754  
1752  
1750  
1748  
1746  
1744  
1742  
1740  
1738  
1736  
1734  
1732  
1730  
1728  
1726  
1724  
1722  
1720  
1718  
1716  
1714  
1712  
1710  
1708  
1706  
1704  
1702  
1700  
1698  
1696  
1694  
1692  
1690  
1688  
1686  
1684  
1682  
1680  
1678  
1676  
1674  
1672  
1670  
1668  
1666  
1664  
1662  
1660  
1658  
1656  
1654  
1652  
1650  
1648  
1646  
1644  
1642  
1640  
1638  
1636  
1634  
1632  
1630  
1628  
1626  
1624  
1622  
1620  
1618  
1616  
1614  
1612  
1610  
1608  
1606  
1604  
1602  
1600  
1598  
1596  
1594  
1592  
1590  
1588  
1586  
1584  
1582  
1580  
1578  
1576  
1574  
1572  
1570  
1568  
1566  
1564  
1562  
1560  
1558  
1556  
1554  
1552  
1550  
1548  
1546  
1544  
1542  
1540  
1538  
1536  
1534  
1532  
1530  
1528  
1526  
1524  
1522  
1520  
1518  
1516  
1514  
1512  
1510  
1508  
1506  
1504  
1502  
1500  
1498  
1496  
1494  
1492  
1490  
1488  
1486  
1484  
1482  
1480  
1478  
1476  
1474  
1472  
1470  
1468  
1466  
1464  
1462  
1460  
1458  
1456  
1454  
1452  
1450  
1448  
1446  
1444  
1442  
1440  
1438  
1436  
1434  
1432  
1430  
1428  
1426  
1424  
1422  
1420  
1418  
1416  
1414  
1412  
1410  
1408  
1406  
1404  
1402  
1400  
1398  
1396  
1394  
1392  
1390  
1388  
1386  
1384  
1382  
1380  
1378  
1376  
1374  
1372  
1370  
1368  
1366  
1364  
1362  
1360  
1358  
1356  
1354  
1352  
1350  
1348  
1346  
1344  
1342  
1340  
1338  
1336  
1334  
1332  
1330  
1328  
1326  
1324  
1322  
1320  
1318  
1316  
1314  
1312  
1310  
1308  
1306  
1304  
1302  
1300  
1298  
1296  
1294  
1292  
1290  
1288  
1286  
1284  
1282  
1280  
1278  
1276  
1274  
1272  
1270  
1268  
1266  
1264  
1262  
1260  
1258  
1256  
1254  
1252  
1250  
1248  
1246  
1244  
1242  
1240  
1238  
1236  
1234  
1232  
1230  
1228  
1226  
1224  
1222  
1220  
1218  
1216  
1214  
1212  
1210  
1208  
1206  
1204  
1202  
1200  
1198  
1196  
1194  
1192  
1190  
1188  
1186  
1184  
1182  
1180  
1178  
1176  
1174  
1172  
1170  
1168  
1166  
1164  
1162  
1160  
1158  
1156  
1154  
1152  
1150  
1148  
1146  
1144  
1142  
1140  
1138  
1136  
1134  
1132  
1130  
1128  
1126  
1124  
1122  
1120  
1118  
1116  
1114  
1112  
1110  
1108  
1106  
1104  
1102  
1100  
1098  
1096  
1094  
1092  
1090  
1088  
1086  
1084  
1082  
1080  
1078  
1076  
1074  
1072  
1070  
1068  
1066  
1064  
1062  
1060  
1058  
1056  
1054  
1052  
1050  
1048  
1046  
1044  
1042  
1040  
1038  
1036  
1034  
1032  
1030  
1028  
1026  
1024  
1022  
1020  
1018  
1016  
1014  
1012  
1010  
1008  
1006  
1004  
1002  
1000  
998  
996  
994  
992  
990  
988  
986  
984  
982  
980  
978  
976  
974  
972  
970  
968  
966  
964  
962  
960  
958  
956  
954  
952  
950  
948  
946  
944  
942  
940  
938  
936  
934  
932  
930  
928  
926  
924  
922  
920  
918  
916  
914  
912  
910  
908  
906  
904  
902  
900  
898  
896  
894  
892  
890  
888  
886  
884  
882  
880  
878  
876  
874  
872  
870  
868  
866  
864  
862  
860  
858  
856  
854  
852  
850  
848  
846  
844  
842  
840  
838  
836  
834  
832  
830  
828  
826  
824  
822  
820  
818  
816  
814  
812  
810  
808  
806  
804  
802  
800  
798  
796  
794  
792  
790  
788  
786  
784  
782  
780  
778  
776  
774  
772  
770  
768  
766  
764  
762  
760  
758  
756  
754  
752  
750  
748  
746  
744  
742  
740  
738  
736  
734  
732  
730  
728  
726  
724  
722  
720  
718  
716  
714  
712  
710  
708  
706  
704  
702  
700  
698  
696  
694  
692  
690  
688  
686  
684  
682  
680  
678  
676  
674  
672  
670  
668  
666  
664  
662  
660  
658  
656  
654  
652  
650  
648  
646  
644  
642  
640  
638  
636  
634  
632  
630  
628  
626  
624  
622  
620  
618  
616  
614  
612  
610  
608  
606  
604  
602  
600  
598  
596  
594  
592  
590  
588  
586  
584  
582  
580  
578  
576  
574  
572  
570  
568  
566  
564  
562  
560  
558  
556  
554  
552  
550  
548  
546  
544  
542  
540  
538  
536  
534  
532  
530  
528  
526  
524  
522  
520  
518  
516  
514  
512  
510  
508  
506  
504  
502  
500  
498  
496  
494  
492  
490  
488  
486  
484  
482  
480  
478  
476  
474  
472  
470  
468  
466  
464  
462  
460  
458  
456  
454  
452  
450  
448  
446  
444  
442  
440  
438  
436  
434  
432  
430  
428  
426  
424  
422  
420  
418  
416  
414  
412  
410  
408  
406  
404  
402  
400  
398  
396  
394  
392  
390  
388  
386  
384  
382  
380  
378  
376  
374  
372  
370  
368  
366  
364  
362  
360  
358  
356  
354  
352  
350  
348  
346  
344  
342  
340  
338  
336  
334  
332  
330  
328  
326  
324  
322  
320  
318  
316  
314  
312  
310  
308  
306  
304  
302  
300  
298  
296  
294  
292  
290  
288  
286  
284  
282  
280  
278  
276  
274  
272  
270  
268  
266  
264  
262  
260  
258  
256  
254  
252  
250  
248  
246  
244  
242  
240  
238  
236  
234  
232  
230  
228  
226  
224  
222  
220  
218  
216  
214  
212  
210  
208  
206  
204  
202  
200  
198  
196  
194  
192  
190  
188  
186  
184  
182  
180  
178  
176  
174  
172  
170  
168  
166  
164  
162  
160  
158  
156  
154  
152  
150  
148  
146  
144  
142  
140  
138  
136  
134  
132  
130  
128  
126  
124  
122  
120  
118  
116  
114  
112  
110  
108  
106  
104  
102  
100  
98  
96  
94  
92  
90  
88  
86  
84  
82  
80  
78  
76  
74  
72  
70  
68  
66  
64  
62  
60  
58  
56  
54  
52  
50  
48  
46  
44  
42  
40  
38  
36  
34  
32  
30  
28  
26  
24  
22  
20  
18  
16  
14  
12  
10  
8  
6  
4  
2  
0  
-2  
-4  
-6  
-8  
-10

NAME Feb01-2011-39  
EXPNO 4  
PROCNO 1  
Date\_ 20110201  
Time 19.52  
INSTRUM av400  
PROBHD 5 mm QNP 1H/13  
PULPROG zg60  
TD 65536  
SOLVENT CDCl3  
NS 16  
DS 2  
SWH 8278.146 Hz  
FIDRES 0.126314 Hz  
AQ 3.9584243 sec  
RG 90.5  
DW 60.400 usec  
DE 7.50 usec  
TE 300.0 K  
D1 1.00000000 sec  
----- CHANNEL f1 -----  
NUC1 1H  
P1 9.00 usec  
PL1 0.00 dB  
SFO1 400.2024714 MHz  
SI 32768  
SF 400.2000028 MHz  
WDW EM  
SSB 0  
LB 0.30 Hz  
GB 0  
PC 1.00

5d

Instrument DQX400  
Chemist BH  
Group MGM  
BH4138  
c13acq.au CDCI3 (C:\NMR) mgmgrp 39

NMR@CHEM.OX

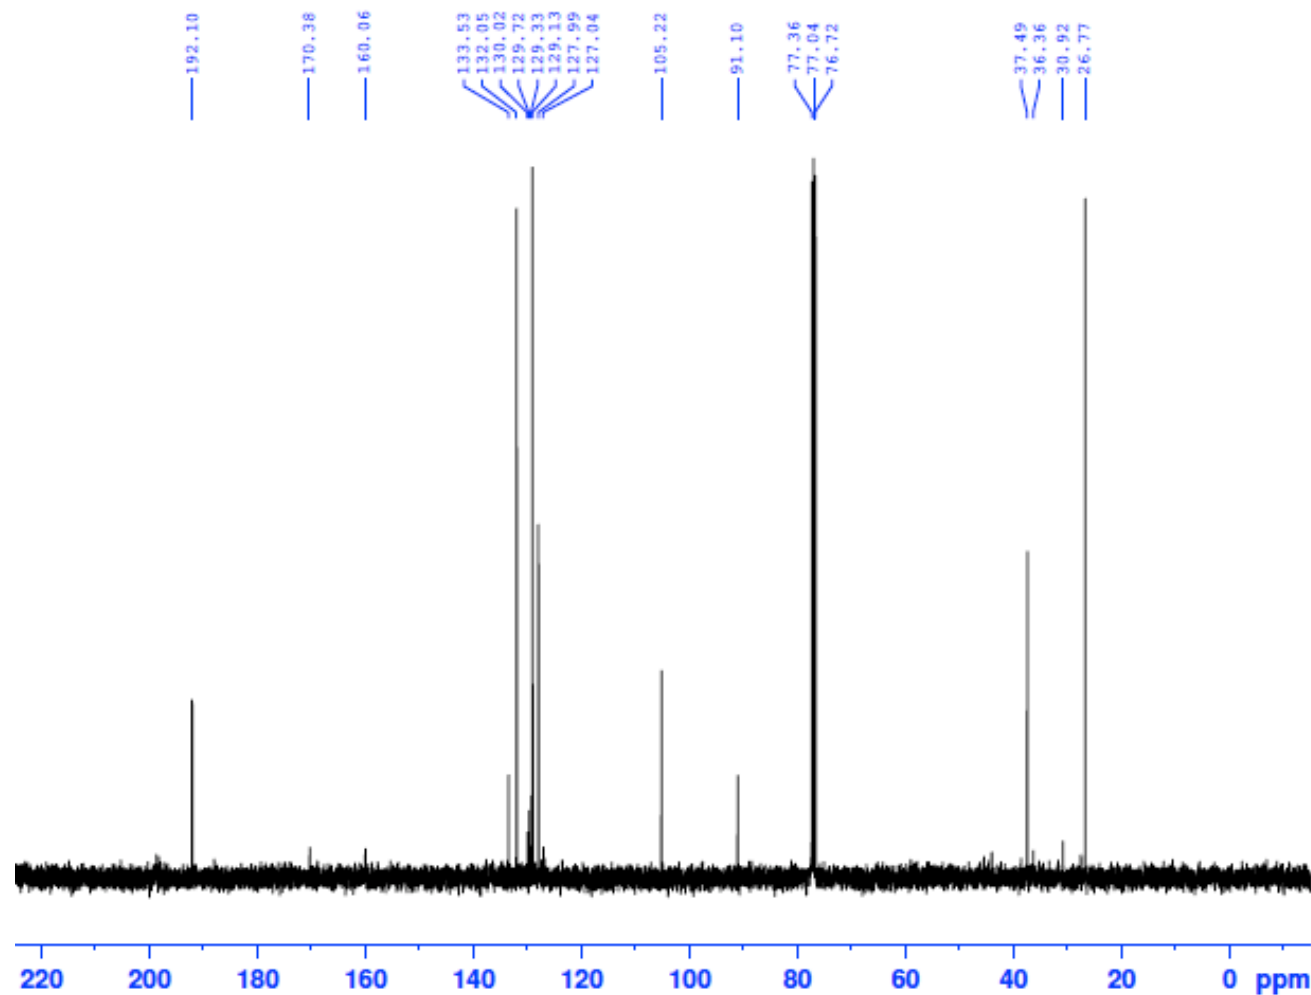

NAME Feb01-2011-39  
EXPNO 5  
PROCNO 1  
Date\_ 20110201  
Time 20.00  
INSTRUM av400  
PROBHD 5 mm QNP 1H/13  
PULPROG zgpg30  
TD 32768  
SOLVENT CDCI3  
NS 256  
DS 4  
SWH 26178.010 Hz  
FIDRES 0.798889 Hz  
AQ 0.6259188 sec  
RG 32768  
DW 19.100 usec  
DE 7.50 usec  
TE 300.0 K  
D1 1.00000000 sec  
D11 0.03000000 sec  
TDO 1

==== CHANNEL f1 =====  
NUC1 13C  
P1 9.50 usec  
PL1 0.00 dB  
SFO1 100.6403931 MHz

==== CHANNEL f2 =====  
CPDPRG2 waltz16  
NUC2 1H  
PCPD2 80.00 usec  
PL2 0.00 dB  
PL12 19.00 dB  
PL13 25.00 dB  
SFO2 400.2016008 MHz  
SI 32768  
SF 100.6303718 MHz  
WDW EM  
SSB 0  
LB 1.00 Hz  
GB 0  
PC 1.40

6a

Instrument DQX400  
Chemist BH  
Group MGM  
BH3152  
h1acq.au CDCI3 {C:NMR} mgmgrp 10

NMROCHEM.OX

NAME Jul23-2010-10  
EXPNO 1  
PROCNO 1  
Date\_ 20100725  
Time 18.06  
INSTRUM av400  
PROBHD 5 mm QNP 1H/13  
PULPROG zg60  
TD 65536  
SOLVENT CDCI3  
NS 16  
DS 2  
SWH 8278.146 Hz  
FIDRES 0.126314 Hz  
AQ 3.9584243 sec  
RG 90.5  
DW 60.400 usec  
DE 7.50 usec  
TE 300.0 K  
D1 1.00000000 sec

----- CHANNEL f1 -----  
NUC1 1H  
P1 9.00 usec  
PL1 0.00 dB  
SFO1 400.2024714 MHz  
SI 32768  
SF 400.2000028 MHz  
WDW EM  
SSB 0  
LB 0.30 Hz  
GB 0  
PC 1.00

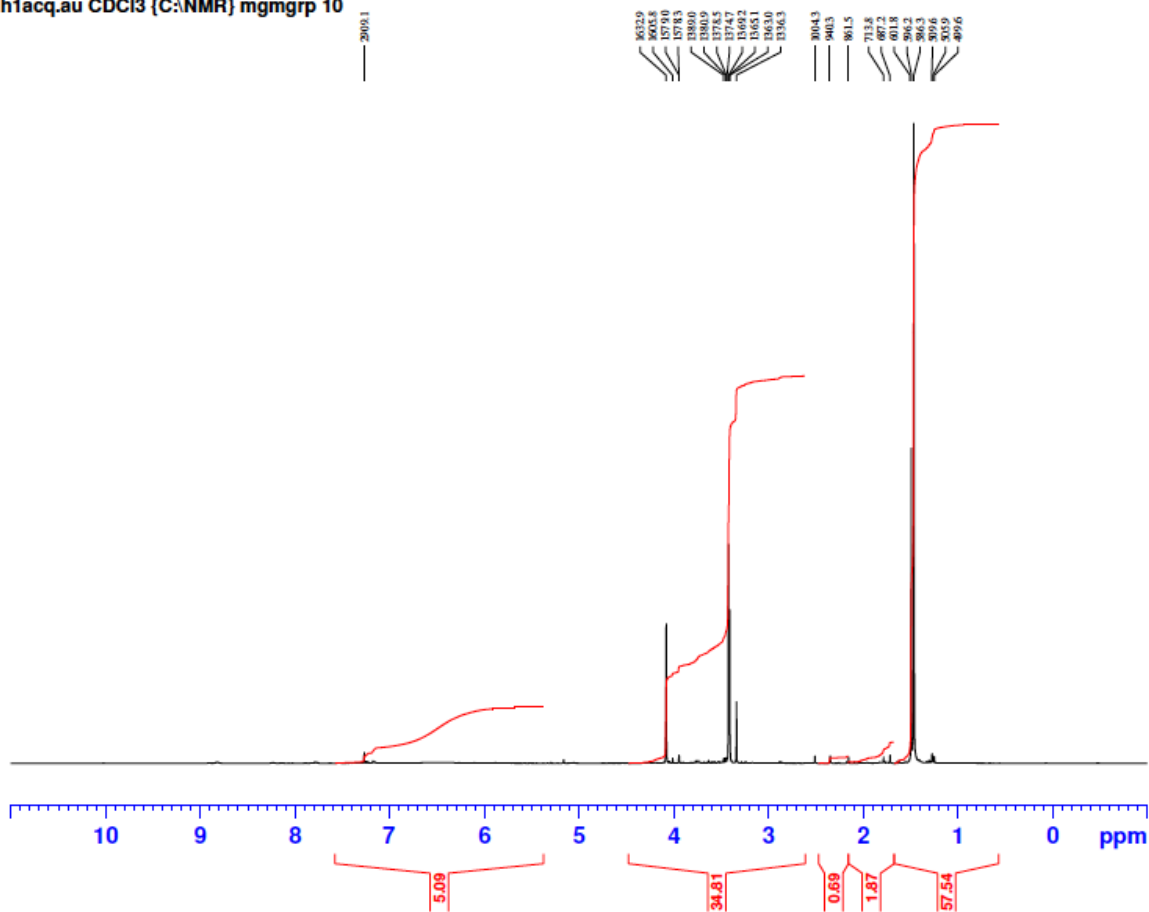



6a

Instrument DQX400  
Chemist BH  
Group MGM  
BH3152  
c13acq.au CDC13 (C:NMR) mgmgrp 10

NMR@CHEM.OX

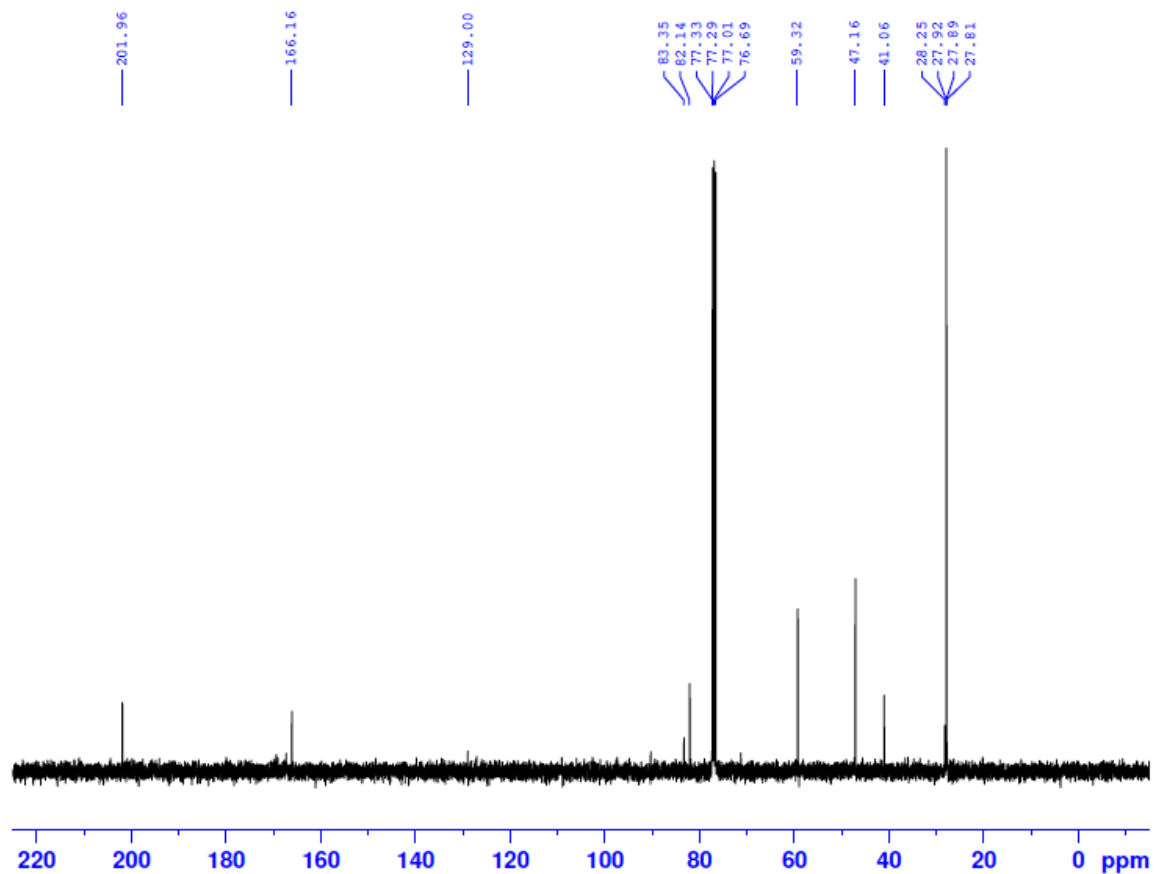

NAME Jul23-2010-10  
EXPNO 2  
PROCNO 1  
Date\_ 20100725  
Time 18.13  
INSTRUM av400  
PROBHD 5 mm QNP 1H/13  
PULPROG zgpg30  
TD 32768  
SOLVENT CDC13  
NS 256  
DS 4  
SWH 26178.010 Hz  
FIDRES 0.798889 Hz  
AQ 0.6259188 sec  
RG 32768  
DW 19.100 usec  
DE 7.50 usec  
TE 300.0 K  
D1 1.00000000 sec  
D11 0.03000000 sec  
TDO 1

----- CHANNEL f1 -----  
NUC1 13C  
P1 9.50 usec  
PL1 0.00 dB  
SFO1 100.6403931 MHz

----- CHANNEL f2 -----  
CPDPRG2 waltz16  
NUC2 1H  
PCPD2 80.00 usec  
PL2 0.00 dB  
PL12 19.00 dB  
PL13 25.00 dB  
SFO2 400.2016008 MHz  
SI 32768  
SF 100.6303718 MHz  
WDW EM  
SSB 0  
LB 1.00 Hz  
GB 0  
PC 1.40

6b

Instrument DQX400  
Chemist BH  
Group MGM  
BH4100  
h1acq.au CDC13 {C:NMR} mgmgrp 5

NMROCHEM.OX

2006  
2005  
2004  
2003  
2002  
2001  
2000  
1999  
1998  
1997  
1996  
1995  
1994  
1993  
1992  
1991  
1990  
1889  
1888  
1887  
1886  
1885  
1884  
1883  
1882  
1881  
1880  
1879  
1878  
1877  
1876  
1875  
1874  
1873  
1872  
1871  
1870  
1869  
1868  
1867  
1866  
1865  
1864  
1863  
1862  
1861  
1860  
1859  
1858  
1857  
1856  
1855  
1854  
1853  
1852  
1851  
1850  
1849  
1848  
1847  
1846  
1845  
1844  
1843  
1842  
1841  
1840  
1839  
1838  
1837  
1836  
1835  
1834  
1833  
1832  
1831  
1830  
1829  
1828  
1827  
1826  
1825  
1824  
1823  
1822  
1821  
1820  
1819  
1818  
1817  
1816  
1815  
1814  
1813  
1812  
1811  
1810  
1809  
1808  
1807  
1806  
1805  
1804  
1803  
1802  
1801  
1800  
1799  
1798  
1797  
1796  
1795  
1794  
1793  
1792  
1791  
1790  
1789  
1788  
1787  
1786  
1785  
1784  
1783  
1782  
1781  
1780  
1779  
1778  
1777  
1776  
1775  
1774  
1773  
1772  
1771  
1770  
1769  
1768  
1767  
1766  
1765  
1764  
1763  
1762  
1761  
1760  
1759  
1758  
1757  
1756  
1755  
1754  
1753  
1752  
1751  
1750  
1749  
1748  
1747  
1746  
1745  
1744  
1743  
1742  
1741  
1740  
1739  
1738  
1737  
1736  
1735  
1734  
1733  
1732  
1731  
1730  
1729  
1728  
1727  
1726  
1725  
1724  
1723  
1722  
1721  
1720  
1719  
1718  
1717  
1716  
1715  
1714  
1713  
1712  
1711  
1710  
1709  
1708  
1707  
1706  
1705  
1704  
1703  
1702  
1701  
1700  
1699  
1698  
1697  
1696  
1695  
1694  
1693  
1692  
1691  
1690  
1689  
1688  
1687  
1686  
1685  
1684  
1683  
1682  
1681  
1680  
1679  
1678  
1677  
1676  
1675  
1674  
1673  
1672  
1671  
1670  
1669  
1668  
1667  
1666  
1665  
1664  
1663  
1662  
1661  
1660  
1659  
1658  
1657  
1656  
1655  
1654  
1653  
1652  
1651  
1650  
1649  
1648  
1647  
1646  
1645  
1644  
1643  
1642  
1641  
1640  
1639  
1638  
1637  
1636  
1635  
1634  
1633  
1632  
1631  
1630  
1629  
1628  
1627  
1626  
1625  
1624  
1623  
1622  
1621  
1620  
1619  
1618  
1617  
1616  
1615  
1614  
1613  
1612  
1611  
1610  
1609  
1608  
1607  
1606  
1605  
1604  
1603  
1602  
1601  
1600  
1599  
1598  
1597  
1596  
1595  
1594  
1593  
1592  
1591  
1590  
1589  
1588  
1587  
1586  
1585  
1584  
1583  
1582  
1581  
1580  
1579  
1578  
1577  
1576  
1575  
1574  
1573  
1572  
1571  
1570  
1569  
1568  
1567  
1566  
1565  
1564  
1563  
1562  
1561  
1560  
1559  
1558  
1557  
1556  
1555  
1554  
1553  
1552  
1551  
1550  
1549  
1548  
1547  
1546  
1545  
1544  
1543  
1542  
1541  
1540  
1539  
1538  
1537  
1536  
1535  
1534  
1533  
1532  
1531  
1530  
1529  
1528  
1527  
1526  
1525  
1524  
1523  
1522  
1521  
1520  
1519  
1518  
1517  
1516  
1515  
1514  
1513  
1512  
1511  
1510  
1509  
1508  
1507  
1506  
1505  
1504  
1503  
1502  
1501  
1500  
1499  
1498  
1497  
1496  
1495  
1494  
1493  
1492  
1491  
1490  
1489  
1488  
1487  
1486  
1485  
1484  
1483  
1482  
1481  
1480  
1479  
1478  
1477  
1476  
1475  
1474  
1473  
1472  
1471  
1470  
1469  
1468  
1467  
1466  
1465  
1464  
1463  
1462  
1461  
1460  
1459  
1458  
1457  
1456  
1455  
1454  
1453  
1452  
1451  
1450  
1449  
1448  
1447  
1446  
1445  
1444  
1443  
1442  
1441  
1440  
1439  
1438  
1437  
1436  
1435  
1434  
1433  
1432  
1431  
1430  
1429  
1428  
1427  
1426  
1425  
1424  
1423  
1422  
1421  
1420  
1419  
1418  
1417  
1416  
1415  
1414  
1413  
1412  
1411  
1410  
1409  
1408  
1407  
1406  
1405  
1404  
1403  
1402  
1401  
1400  
1399  
1398  
1397  
1396  
1395  
1394  
1393  
1392  
1391  
1390  
1389  
1388  
1387  
1386  
1385  
1384  
1383  
1382  
1381  
1380  
1379  
1378  
1377  
1376  
1375  
1374  
1373  
1372  
1371  
1370  
1369  
1368  
1367  
1366  
1365  
1364  
1363  
1362  
1361  
1360  
1359  
1358  
1357  
1356  
1355  
1354  
1353  
1352  
1351  
1350  
1349  
1348  
1347  
1346  
1345  
1344  
1343  
1342  
1341  
1340  
1339  
1338  
1337  
1336  
1335  
1334  
1333  
1332  
1331  
1330  
1329  
1328  
1327  
1326  
1325  
1324  
1323  
1322  
1321  
1320  
1319  
1318  
1317  
1316  
1315  
1314  
1313  
1312  
1311  
1310  
1309  
1308  
1307  
1306  
1305  
1304  
1303  
1302  
1301  
1300  
1299  
1298  
1297  
1296  
1295  
1294  
1293  
1292  
1291  
1290  
1289  
1288  
1287  
1286  
1285  
1284  
1283  
1282  
1281  
1280  
1279  
1278  
1277  
1276  
1275  
1274  
1273  
1272  
1271  
1270  
1269  
1268  
1267  
1266  
1265  
1264  
1263  
1262  
1261  
1260  
1259  
1258  
1257  
1256  
1255  
1254  
1253  
1252  
1251  
1250  
1249  
1248  
1247  
1246  
1245  
1244  
1243  
1242  
1241  
1240  
1239  
1238  
1237  
1236  
1235  
1234  
1233  
1232  
1231  
1230  
1229  
1228  
1227  
1226  
1225  
1224  
1223  
1222  
1221  
1220  
1219  
1218  
1217  
1216  
1215  
1214  
1213  
1212  
1211  
1210  
1209  
1208  
1207  
1206  
1205  
1204  
1203  
1202  
1201  
1200  
1199  
1198  
1197  
1196  
1195  
1194  
1193  
1192  
1191  
1190  
1189  
1188  
1187  
1186  
1185  
1184  
1183  
1182  
1181  
1180  
1179  
1178  
1177  
1176  
1175  
1174  
1173  
1172  
1171  
1170  
1169  
1168  
1167  
1166  
1165  
1164  
1163  
1162  
1161  
1160  
1159  
1158  
1157  
1156  
1155  
1154  
1153  
1152  
1151  
1150  
1149  
1148  
1147  
1146  
1145  
1144  
1143  
1142  
1141  
1140  
1139  
1138  
1137  
1136  
1135  
1134  
1133  
1132  
1131  
1130  
1129  
1128  
1127  
1126  
1125  
1124  
1123  
1122  
1121  
1120  
1119  
1118  
1117  
1116  
1115  
1114  
1113  
1112  
1111  
1110  
1109  
1108  
1107  
1106  
1105  
1104  
1103  
1102  
1101  
1100  
1099  
1098  
1097  
1096  
1095  
1094  
1093  
1092  
1091  
1090  
1089  
1088  
1087  
1086  
1085  
1084  
1083  
1082  
1081  
1080  
1079  
1078  
1077  
1076  
1075  
1074  
1073  
1072  
1071  
1070  
1069  
1068  
1067  
1066  
1065  
1064  
1063  
1062  
1061  
1060  
1059  
1058  
1057  
1056  
1055  
1054  
1053  
1052  
1051  
1050  
1049  
1048  
1047  
1046  
1045  
1044  
1043  
1042  
1041  
1040  
1039  
1038  
1037  
1036  
1035  
1034  
1033  
1032  
1031  
1030  
1029  
1028  
1027  
1026  
1025  
1024  
1023  
1022  
1021  
1020  
1019  
1018  
1017  
1016  
1015  
1014  
1013  
1012  
1011  
1010  
1009  
1008  
1007  
1006  
1005  
1004  
1003  
1002  
1001  
1000  
999  
998  
997  
996  
995  
994  
993  
992  
991  
990  
989  
988  
987  
986  
985  
984  
983  
982  
981  
980  
979  
978  
977  
976  
975  
974  
973  
972  
971  
970  
969  
968  
967  
966  
965  
964  
963  
962  
961  
960  
959  
958  
957  
956  
955  
954  
953  
952  
951  
950  
949  
948  
947  
946  
945  
944  
943  
942  
941  
940  
939  
938  
937  
936  
935  
934  
933  
932  
931  
930  
929  
928  
927  
926  
925  
924  
923  
922  
921  
920  
919  
918  
917  
916  
915  
914  
913  
912  
911  
910  
909  
908  
907  
906  
905  
904  
903  
902  
901  
900  
899  
898  
897  
896  
895  
894  
893  
892  
891  
890  
889  
888  
887  
886  
885  
884  
883  
882  
881  
880  
879  
878  
877  
876  
875  
874  
873  
872  
871  
870  
869  
868  
867  
866  
865  
864  
863  
862  
861  
860  
859  
858  
857  
856  
855  
854  
853  
852  
851  
850  
849  
848  
847  
846  
845  
844  
843  
842  
841  
840  
839  
838  
837  
836  
835  
834  
833  
832  
831  
830  
829  
828  
827  
826  
825  
824  
823  
822  
821  
820  
819  
818  
817  
816  
815  
814  
813  
812  
811  
810  
809  
808  
807  
806  
805  
804  
803  
802  
801  
800  
799  
798  
797  
796  
795  
794  
793  
792  
791  
790  
789  
788  
787  
786  
785  
784  
783  
782  
781  
780  
779  
778  
777  
776  
775  
774  
773  
772  
771  
770  
769  
768  
767  
766  
765  
764  
763  
762  
761  
760  
759  
758  
757  
756  
755  
754  
753  
752  
751  
750  
749  
748  
747  
746  
745  
744  
743  
742  
741  
740  
739  
738  
737  
736  
735  
734  
733  
732  
731  
730  
729  
728  
727  
726  
725  
724  
723  
722  
721  
720  
719  
718  
717  
716  
715  
714  
713  
712  
711  
710  
709  
708  
707  
706  
705  
704  
703  
702  
701  
700  
699  
698  
697  
696  
695  
694  
693  
692  
691  
690  
689  
688  
687  
686  
685  
684  
683  
682  
681  
680  
679  
678  
677  
676  
675  
674  
673  
672  
671  
670  
669  
668  
667  
666  
665  
664  
663  
662  
661  
660  
659  
658  
657  
656  
655  
654  
653  
652  
651  
650  
649  
648  
647  
646  
645  
644  
643  
642  
641  
640  
639  
638  
637  
636  
635  
634  
633  
632  
631  
630  
629  
628  
627  
626  
625  
624  
623  
622  
621  
620  
619  
618  
617  
616  
615  
614  
613  
612  
611  
610  
609  
608  
607  
606  
605  
604  
603  
602  
601  
600  
599  
598  
597  
596  
595  
594  
593  
592  
591  
590  
589  
588  
587  
586  
585  
584  
583  
582  
581  
580  
579  
578  
577  
576  
575  
574  
573  
572  
571  
570  
569  
568  
567  
566  
565  
564  
563  
562  
561  
560  
559  
558  
557  
556  
555  
554  
553  
552  
551  
550  
549  
548  
547  
546  
545  
544  
543  
542  
541  
540  
539  
538  
537  
536  
535  
534  
533  
532  
531  
530  
529  
528  
527  
526  
525  
524  
523  
522  
521  
520  
519  
518  
517  
516  
515  
514  
513  
512  
511  
510  
509  
508  
507  
506  
505  
504  
503  
502  
501  
500  
499  
498  
497  
496  
495  
494  
493  
492  
491  
490  
489  
488  
487  
486  
485  
484  
483  
482  
481  
480  
479  
478  
477  
476  
475  
474  
473  
472  
471  
470  
469  
468  
467  
466  
465  
464  
463  
462  
461  
460  
459  
458  
457  
456  
455  
454  
453  
452  
451  
450  
449  
448  
447  
446  
445  
444  
443  
442  
441  
440  
439  
438  
437  
436  
435  
434  
433  
432  
431  
430  
429  
428  
427  
426  
425  
424  
423  
422  
421  
420  
419  
418  
417  
416  
415  
414  
413  
412  
411  
410  
409  
408  
407  
406  
405  
404  
403  
402  
401  
400  
399  
398  
397  
396  
395  
394  
393  
392  
391  
390  
389  
388  
387  
386  
385  
384  
383  
382  
381  
380  
379  
378  
377  
376  
375  
374  
373  
372  
371  
370  
369  
368  
367  
366  
365  
364  
363  
362  
361  
360  
359  
358  
357  
356  
355  
354  
353  
352  
351  
350  
349  
348  
347  
346  
345  
344  
343  
342  
341  
340  
339  
338  
337  
336  
335  
334  
333  
332  
331  
330  
329  
328  
327  
326  
325  
324  
323  
322  
321  
320  
319  
318  
317  
316  
315  
314  
313  
312  
311  
310  
309  
308  
307  
306  
305  
304  
303  
302  
301  
300  
299  
298  
297  
296  
295  
294  
293  
292  
291  
290  
289  
288  
287  
286  
285  
284  
283  
282  
281  
280  
279  
278  
277  
276  
275  
274  
273  
272  
271  
270  
269  
268  
267  
266  
265  
264  
263  
262  
261  
260  
259  
258  
257  
256  
255  
254  
253  
252  
251  
250  
249  
248  
247  
246  
245  
244  
243  
242  
241  
240  
239  
238  
237  
236  
235  
234  
233  
232  
231  
230  
229  
228  
227  
226  
225  
224  
223  
222  
221  
220  
219  
218  
217  
216  
215  
214  
213  
212  
211  
210  
209  
208  
207  
206  
205  
204  
203  
202  
201  
200  
199  
198  
197  
196  
195  
194  
193  
192  
191  
190  
189  
188  
187  
186  
185  
184  
183  
182  
181  
180  
179  
178  
177  
176  
175  
174  
173  
172  
171  
170  
169  
168  
167  
166  
165  
164  
163  
162  
161  
160  
159  
158  
157  
156  
155  
154  
153  
152  
151  
150  
149  
148  
147  
146  
145  
144  
143  
142  
141  
140  
139  
138  
137  
136  
135  
134  
133  
132  
131  
130  
129  
128  
127  
126  
125  
124  
123  
122  
121  
120  
119  
118  
117  
116  
115  
114  
113  
112  
111  
110  
109  
108  
107  
106  
105  
104  
103  
102  
101  
100  
99  
98  
97  
96  
95  
94  
93  
92  
91  
90  
89  
88  
87  
86  
85  
84  
83  
82  
81  
80  
79  
78  
77  
76  
75  
74  
73  
72  
71  
70  
69  
68  
67  
66  
65  
64  
63  
62  
61  
60  
59  
58  
57  
56  
55  
54  
53  
52  
51  
50  
49  
48  
47  
46  
45  
44  
43  
42  
41  
40  
39  
38  
37  
36  
35  
34  
33  
32  
31  
30  
29  
28  
27  
26  
25  
24  
23  
22  
21  
20  
19  
18  
17  
16  
15  
14  
13  
12  
11  
10  
9  
8  
7  
6  
5  
4  
3  
2  
1  
0 ppm

NAME Dec13-2010-5  
EXPNO 1  
PROCNO 1  
Date\_ 20101213  
Time 10.02  
INSTRUM av400  
PROBHD 5 mm QNP 1H/13  
PULPROG zg60  
TD 65536  
SOLVENT CDC13  
NS 16  
DS 2  
SWH 8278.146 Hz  
FIDRES 0.126314 Hz  
AQ 3.9584243 sec  
RG 90.5  
DW 60.400 usec  
DE 7.50 usec  
TE 300.0 K  
D1 1.00000000 sec

----- CHANNEL f1 -----  
NUC1 1H  
P1 9.00 usec  
PL1 0.00 dB  
SFO1 400.2024714 MHz  
SI 32768  
SF 400.2000028 MHz  
WDW EM  
SSB 0  
LB 0.30 Hz  
GB 0  
PC 1.00

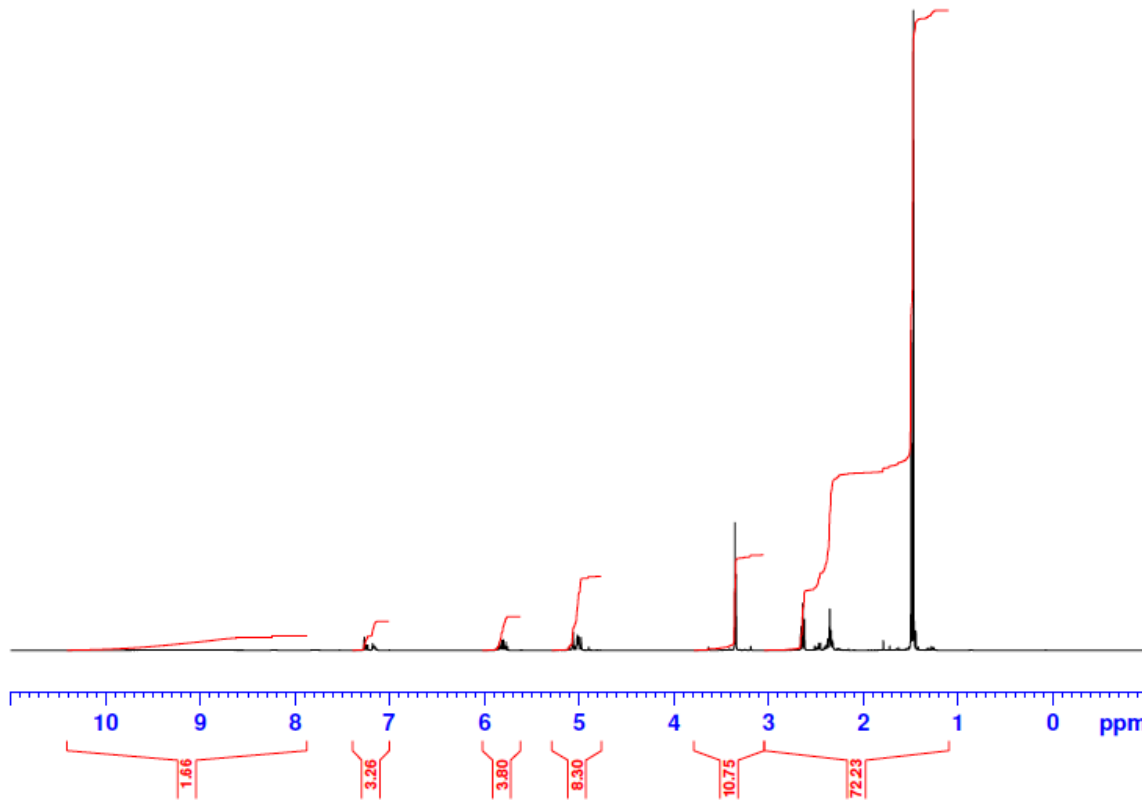

6b

Instrument DQX400  
Chemist BH  
Group MGM  
BH3152  
c13acq.au CDC13 (C:NMR) mgmgrp 10

NMR@CHEM.OX



```
NAME      Jul23-2010-10
EXPNO     2
PROCNO    1
Date_     20100725
Time      18.13
INSTRUM   av400
PROBHD    5 mm QNP 1H/13
PULPROG   zgpg30
TD         32768
SOLVENT   CDC13
NS         256
DS         4
SWH       26178.010 Hz
FIDRES    0.798889 Hz
AQ         0.6259188 sec
RG         32768
DW         19.100 usec
DE         7.50 usec
TE         300.0 K
D1         1.00000000 sec
D11        0.03000000 sec
TD0        1
```

```
----- CHANNEL f1 -----
NUC1      13C
P1        9.50 usec
PL1       0.00 dB
SFO1     100.6403931 MHz
```

```
----- CHANNEL f2 -----
CPDPRG2   waltz16
NUC2      1H
PCPD2     80.00 usec
PL2       0.00 dB
PL12     19.00 dB
PL13     25.00 dB
SFO2     400.2016008 MHz
SI        32768
SF       100.6303718 MHz
WDW       EM
SSB       0
LB        1.00 Hz
GB        0
PC        1.40
```



6c

Instrument DQX400  
Chemist BH  
Group MGM  
BH4130  
c13acq.au CDC13 (C:NMR) mgmgrp 47

NMR@CHEM.OX

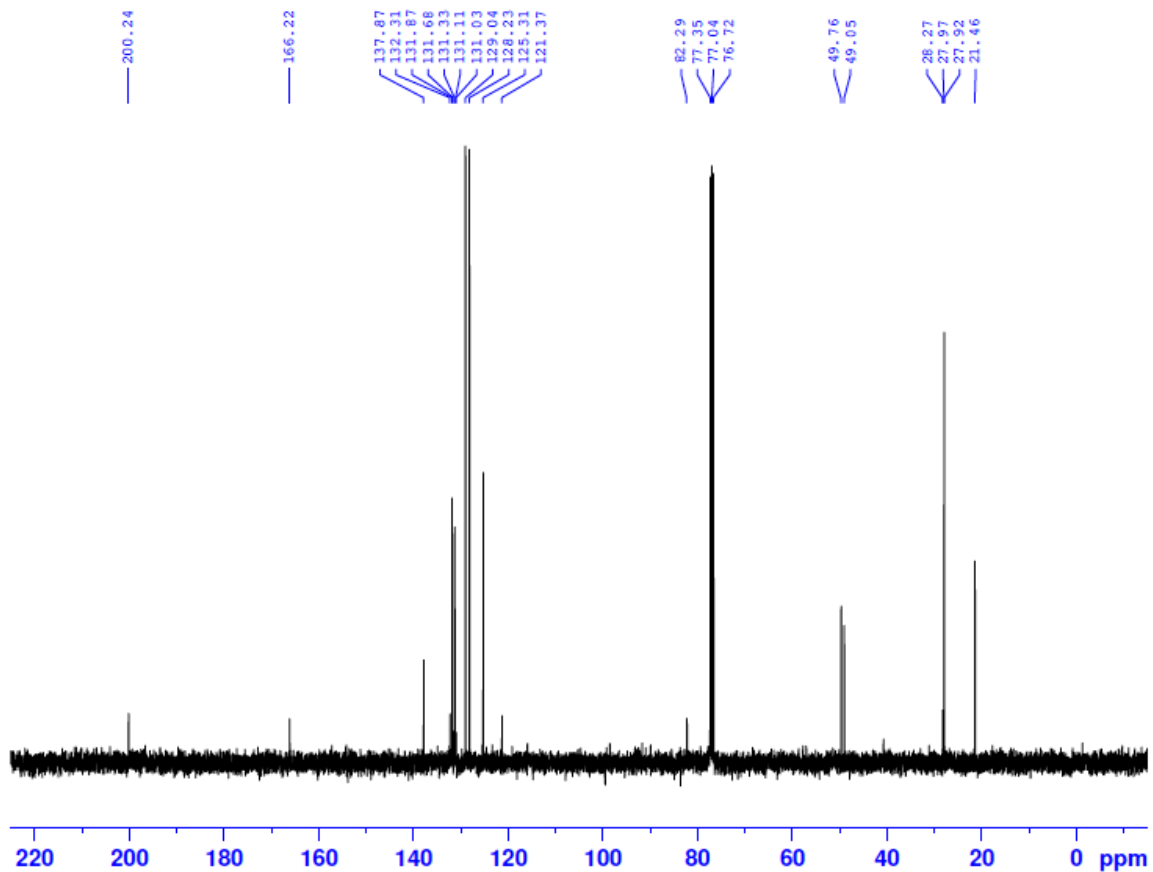

```
NAME      Jan24-2011-47
EXPNO     2
PROCNO    1
Date_     20110124
Time      22.59
INSTRUM   av400
PROBHD    5 mm QNP 1H/13
PULPROG   zgpg30
TD        32768
SOLVENT   CDC13
NS        256
DS        4
SWH       26178.010 Hz
FIDRES    0.798889 Hz
AQ        0.6259188 sec
RG        32768
DW        19.100 usec
DE        7.50 usec
TE        300.0 K
D1        1.00000000 sec
D11       0.03000000 sec
TD0       1

----- CHANNEL f1 -----
NUC1      13C
P1        9.50 usec
PL1       0.00 dB
SFO1     100.6403931 MHz

----- CHANNEL f2 -----
CPDPRG2   waltz16
NUC2      1H
PCPD2     80.00 usec
PL2       0.00 dB
PL12     19.00 dB
PL13     25.00 dB
SFO2     400.2016008 MHz
SI        32768
SF       100.6303718 MHz
WDW       EM
SSB       0
LB        1.00 Hz
GB        0
PC        1.40
```

6d

Instrument DQX400  
Chemist BH  
Group MGM  
BH4150  
h1acq.au CDC13 (C-NMR) mgmgrp 51

NMROCHEM.OX

NAME Feb02-2011-50  
EXPNO 6  
PROCNO 1  
Date\_ 20110202  
Time 23.16  
INSTRUM av400  
PROBHD 5 mm QNP 1H/13  
PULPROG zg60  
TD 65536  
SOLVENT CDC13  
NS 16  
DS 2  
SWH 8278.146 Hz  
FIDRES 0.126314 Hz  
AQ 3.9584243 sec  
RG 128  
DW 60.400 usec  
DE 7.50 usec  
TE 300.0 K  
D1 1.00000000 sec

----- CHANNEL f1 -----  
NUC1 1H  
P1 9.00 usec  
PL1 0.00 dB  
SFO1 400.2024714 MHz  
SI 32768  
SF 400.2000028 MHz  
WDW EM  
SSB 0  
LB 0.30 Hz  
GB 0  
PC 1.00

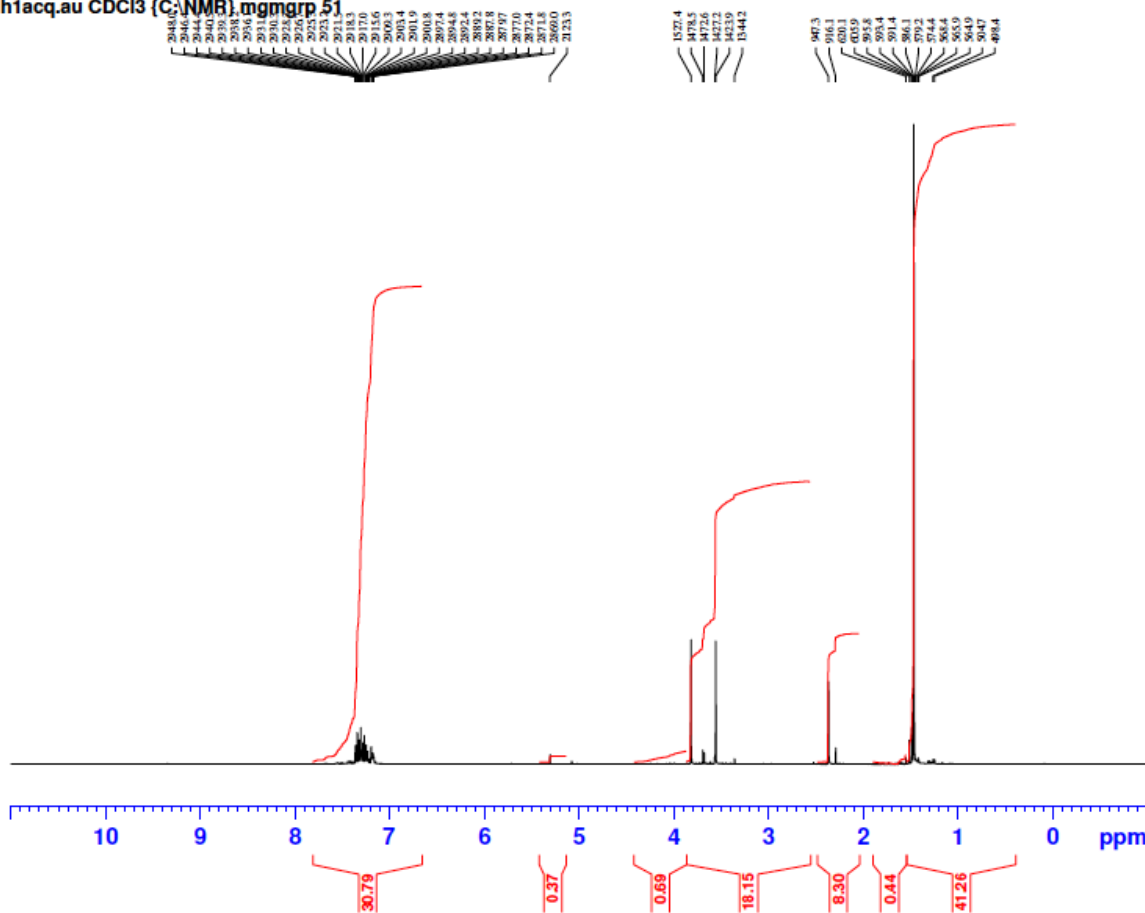

6d

Instrument DQX400  
Chemist BH  
Group MGM  
BH4150  
c13acq.au CDC13 (C:NMR) mgmgrp 51

NMR@CHEM.OX

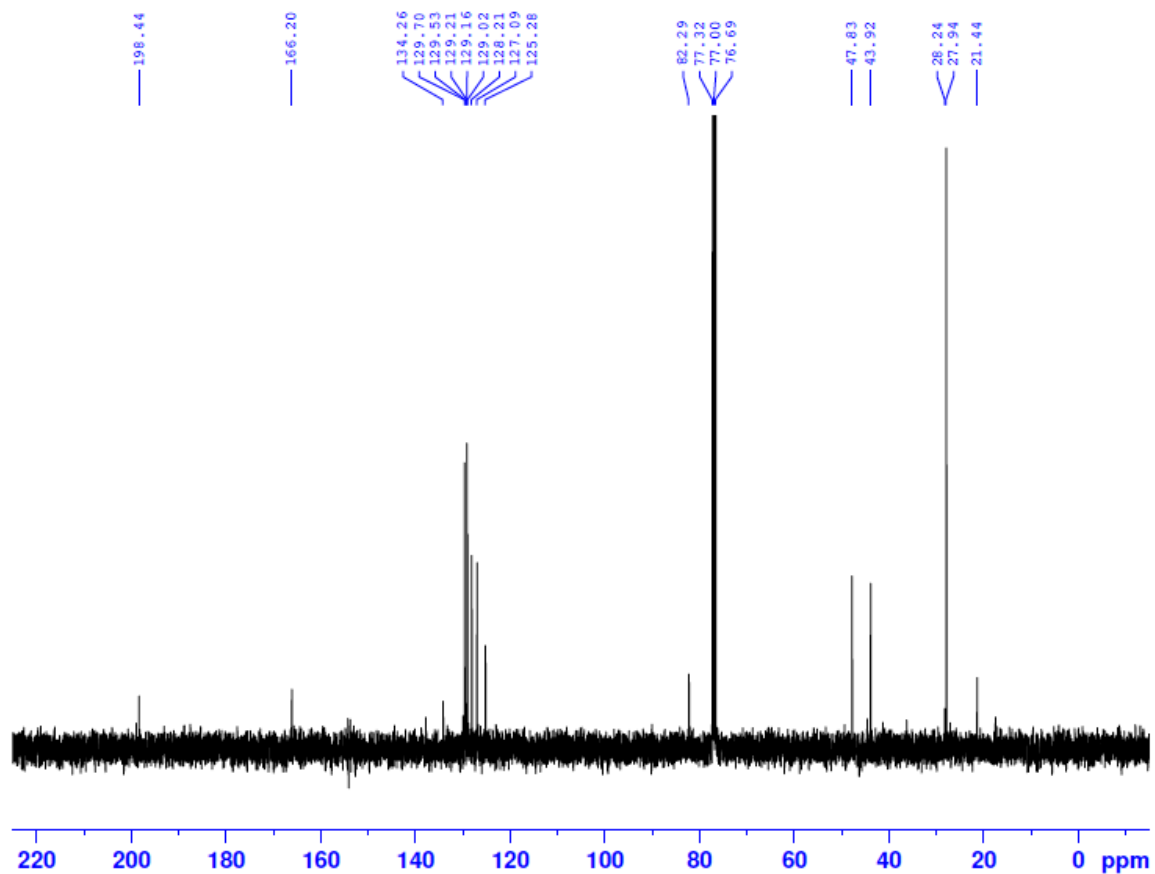

|         |                |
|---------|----------------|
| NAME    | Feb02-2011-50  |
| EXPNO   | 7              |
| PROCNO  | 1              |
| Date_   | 20110202       |
| Time    | 23.24          |
| INSTRUM | av400          |
| PROBHD  | 5 mm QNP 1H/13 |
| PULPROG | zgpg30         |
| TD      | 32768          |
| SOLVENT | CDC13          |
| NS      | 256            |
| DS      | 4              |
| SWH     | 26178.010 Hz   |
| FIDRES  | 0.798889 Hz    |
| AQ      | 0.6259188 sec  |
| RG      | 32768          |
| DW      | 19.100 usec    |
| DE      | 7.50 usec      |
| TE      | 300.0 K        |
| D1      | 1.00000000 sec |
| D11     | 0.03000000 sec |
| TD0     | 1              |

----- CHANNEL f1 -----

|      |                 |
|------|-----------------|
| NUC1 | 13C             |
| P1   | 9.50 usec       |
| PL1  | 0.00 dB         |
| SFO1 | 100.6403931 MHz |

----- CHANNEL f2 -----

|         |                 |
|---------|-----------------|
| CPDPRG2 | waltz16         |
| NUC2    | 1H              |
| PCPD2   | 80.00 usec      |
| PL2     | 0.00 dB         |
| PL12    | 19.00 dB        |
| PL13    | 25.00 dB        |
| SFO2    | 400.2016008 MHz |
| SI      | 32768           |
| SF      | 100.6303718 MHz |
| WDW     | EM              |
| SSB     | 0               |
| LB      | 1.00 Hz         |
| GB      | 0               |
| PC      | 1.40            |

Instrument DQX400  
 Chemist BH  
 Group MGM  
 BH3156  
 h1acq.au CDC13 {C:NMR} mgmgrp 35

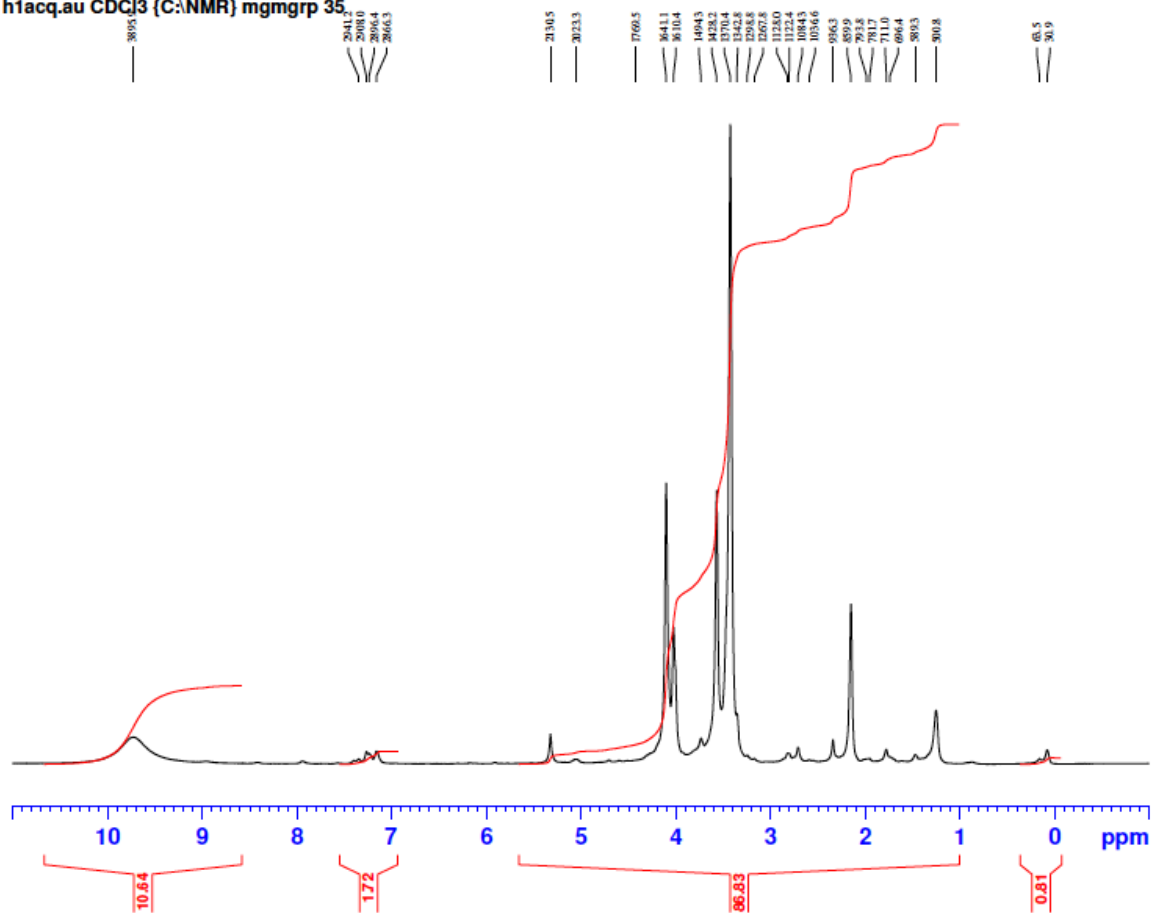



Instrument DQX400  
 Chemist BH  
 Group MGM  
 BH3156  
 c13acq.au CDC13 (C:NMR) mgmgrp 35

NMR@CHEM.OX

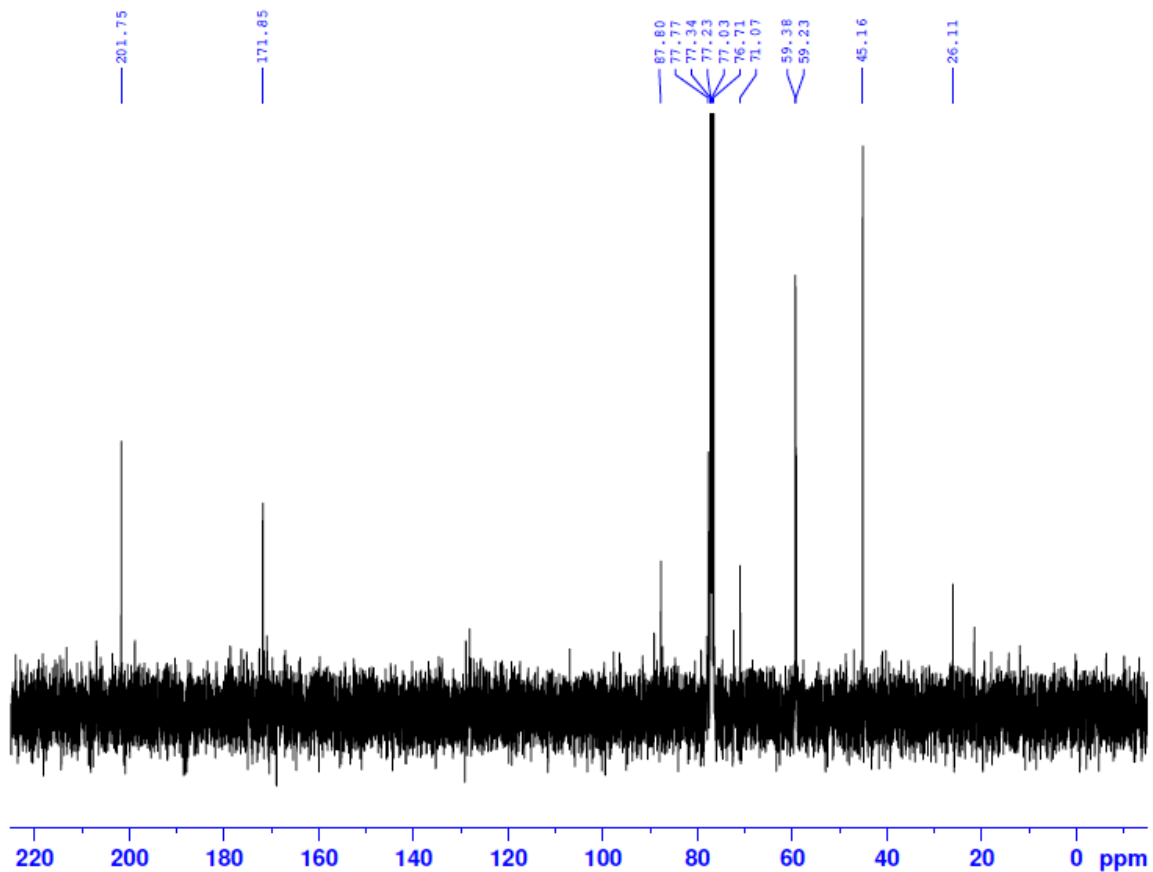

NAME Jul27-2010-35  
 EXPNO 2  
 PROCNO 1  
 Date\_ 20100728  
 Time 21.24  
 INSTRUM av400  
 PROBHD 5 mm QNP 1H/13  
 PULPROG zgpg30  
 TD 32768  
 SOLVENT CDC13  
 NS 256  
 DS 4  
 SWH 26178.010 Hz  
 FIDRES 0.798889 Hz  
 AQ 0.6259188 sec  
 RG 32768  
 DW 19.100 usec  
 DE 7.50 usec  
 TE 300.0 K  
 D1 1.00000000 sec  
 D11 0.03000000 sec  
 TD0 1

----- CHANNEL f1 -----  
 NUC1 13C  
 P1 9.50 usec  
 PL1 0.00 dB  
 SFO1 100.6403931 MHz

----- CHANNEL f2 -----  
 CPDPRG2 waltz16  
 NUC2 1H  
 PCPD2 80.00 usec  
 PL2 0.00 dB  
 PL12 19.00 dB  
 PL13 25.00 dB  
 SFO2 400.2016008 MHz  
 SI 32768  
 SF 100.6303718 MHz  
 WDW EM  
 SSB 0  
 LB 1.00 Hz  
 GB 0  
 PC 1.40

9a

Instrument DQX400  
Chemist BH  
Group MGM  
BH4102

hjacq.au CDC13 (C-NMR) mgmgrp 6

NMROCHEM.OX

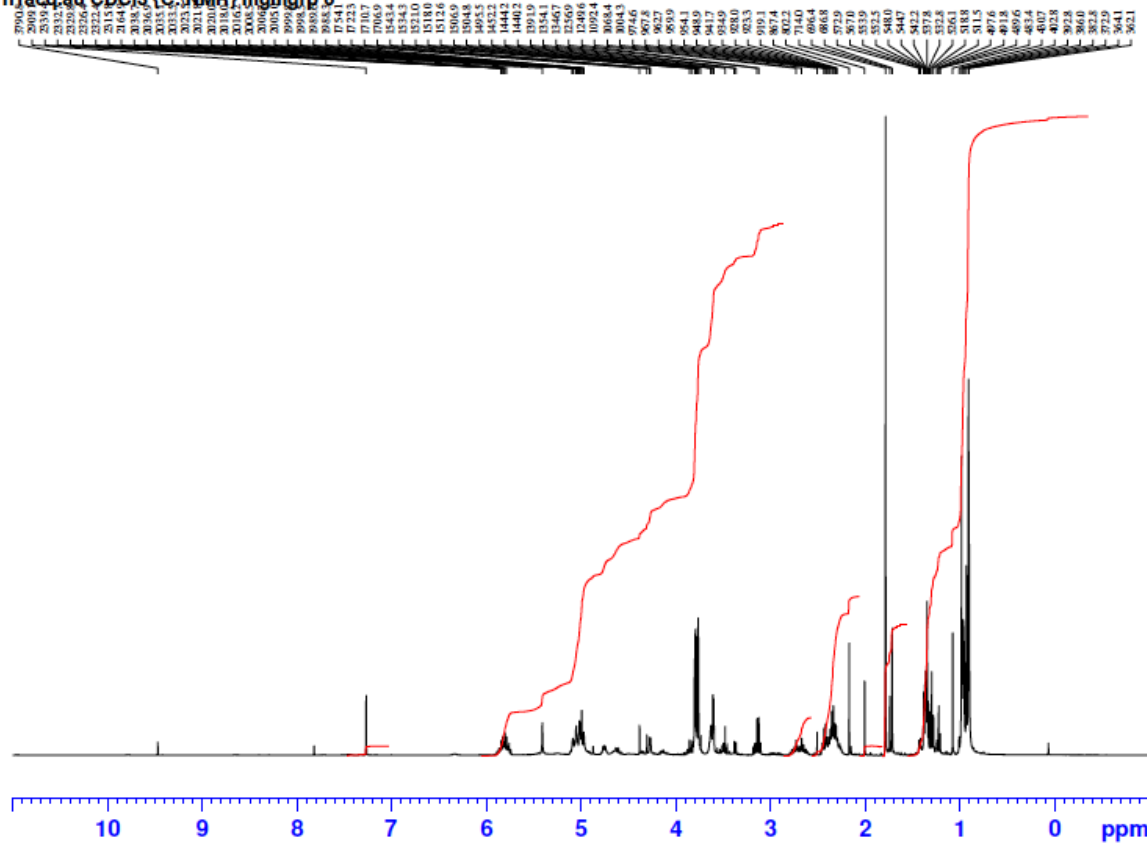

NAME Dec13-2010-5  
EXPNO 6  
PROCNO 1  
Date\_ 20101213  
Time 10.30  
INSTRUM av400  
PROBHD 5 mm QNP 1H/13  
PULPROG zg60  
TD 65536  
SOLVENT CDC13  
NS 16  
DS 2  
SWH 8278.146 Hz  
FIDRES 0.126314 Hz  
AQ 3.9584243 sec  
RG 90.5  
DW 60.400 usec  
DE 7.50 usec  
TE 300.0 K  
D1 1.00000000 sec

----- CHANNEL f1 -----  
NUC1 13C  
P1 9.00 usec  
PL1 0.00 dB  
SF01 400.2024714 MHz  
SI 32768  
SF 400.2000028 MHz  
WDW EM  
SSB 0  
LB 0.30 Hz  
GB 0  
PC 1.00

0.63  
34.83  
2.50  
10.44  
0.60  
8.62  
41.86

9a

Instrument DQX400  
Chemist BH  
Group MGM  
BH4102  
c13acq.au CDC13 (C:NMR) mgmgrp 6

NMR@CHEM.OX

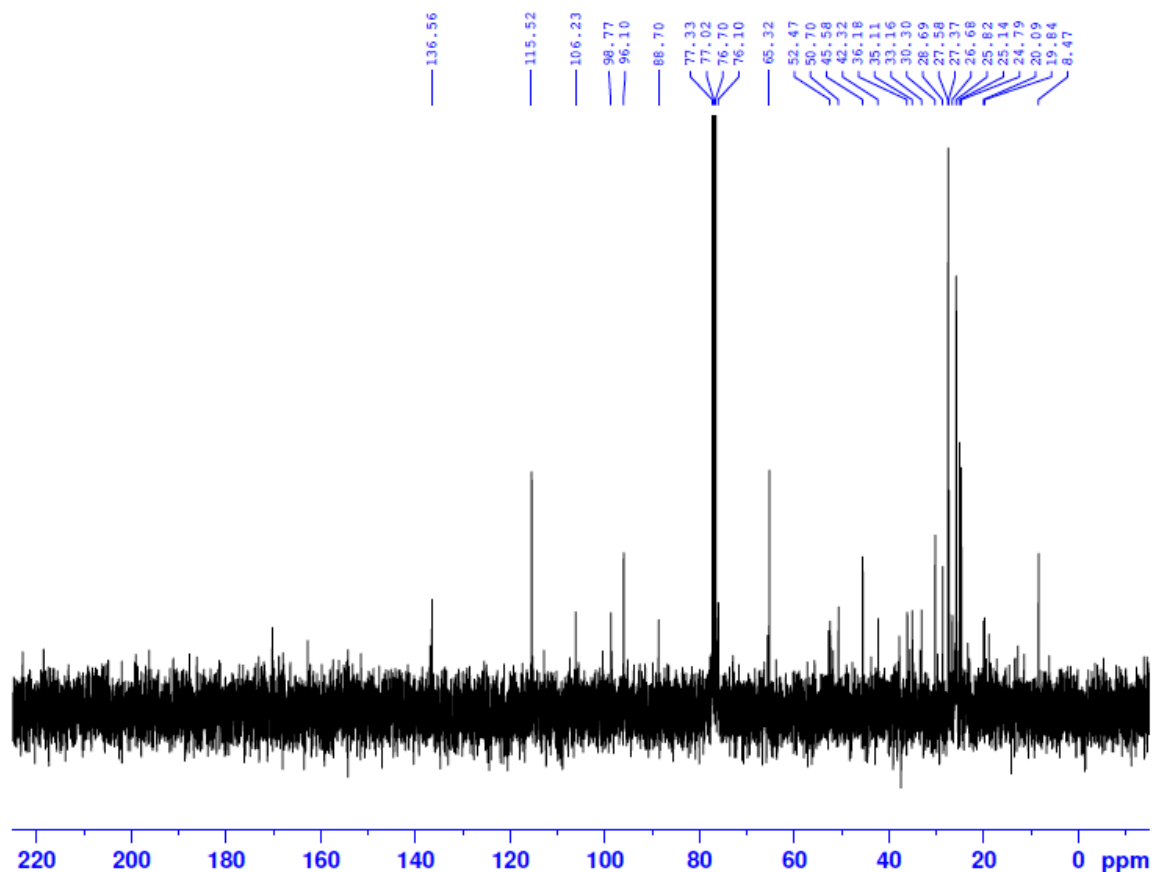

NAME Dec13-2010-5  
EXPNO 7  
PROCNO 1  
Date\_ 20101213  
Time 10.38  
INSTRUM av400  
PROBHD 5 mm QNP 1H/13  
PULPROG zgpg30  
TD 32768  
SOLVENT CDC13  
NS 256  
DS 4  
SWH 26178.010 Hz  
FIDRES 0.798889 Hz  
AQ 0.6259188 sec  
RG 32768  
DW 19.100 usec  
DE 7.50 usec  
TE 300.0 K  
D1 1.00000000 sec  
D11 0.03000000 sec  
TD0 1

----- CHANNEL f1 -----  
NUC1 13C  
P1 9.50 usec  
PL1 0.00 dB  
SFO1 100.6403931 MHz

----- CHANNEL f2 -----  
CPDPRG2 waltz16  
NUC2 1H  
PCPD2 80.00 usec  
PL2 0.00 dB  
PL12 19.00 dB  
PL13 25.00 dB  
SFO2 400.2016008 MHz  
SI 32768  
SF 100.6303718 MHz  
WDW EM  
SSB 0  
LB 1.00 Hz  
GB 0  
PC 1.40

9b

Instrument AVC500  
Group MGM  
2432 Beth Heaviside 7/2/11

NMROCHEM.OX

NAME bh24320702  
EXPNO 1  
PROCNO 1  
Date\_ 20110207  
Time\_ 23.23  
INSTRUM avc500  
PROBHD 5 mm CPDUL 13C  
PULPROG zg30  
TD 65536  
SOLVENT MeOD  
NS 16  
DS 2  
SWH 10330.578 Hz  
FIDRES 0.157632 Hz  
AQ 3.1719923 sec  
RG 4  
DW 48.400 usec  
DE 6.00 usec  
TE 298.0 K  
D1 1.00000000 sec  
TD0 1

----- CHANNEL f1 -----  
NUC1 1H  
P1 9.60 usec  
PL1 -6.00 dB  
PL1W 15.19999981 W  
SFO1 500.3030896 MHz  
SI 32768  
SF 500.3000000 MHz  
WDW EM  
SSB 0  
LB 0.30 Hz  
GB 0  
PC 1.00

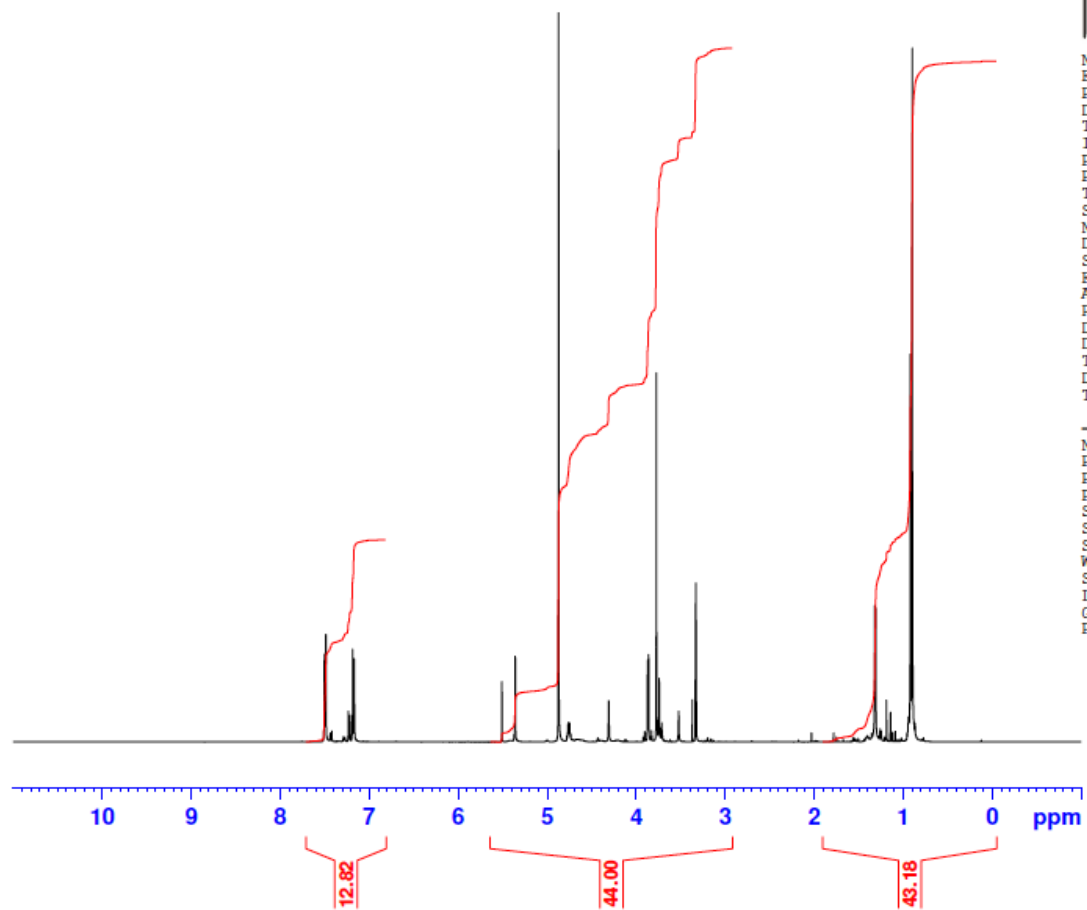



9c

Instrument DQX400  
Chemist BH  
Group MGM  
BH4148 F2 MeOD  
hjacq.au MeOD (F:\NMR2011\mgmgrp 22

NMROCHEM.OX

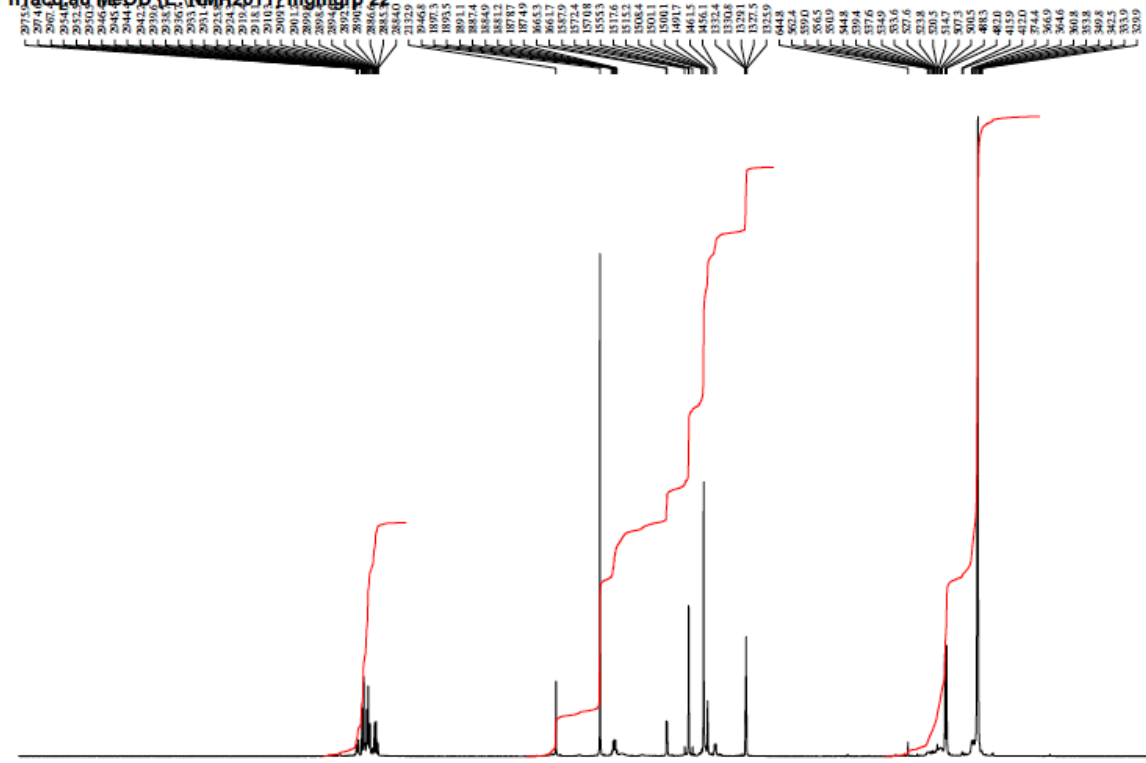

```
NAME Feb09-2011-22
EXPNO 1
PROCNO 1
Date_ 20110210
Time 4.59
INSTRUM av400
PROBHD 5 mm QNP 1H/13
PULPROG zg60
TD 65536
SOLVENT MeOD
NS 16
DS 2
SWH 8278.146 Hz
FIDRES 0.126314 Hz
AQ 3.9584243 sec
RG 90.5
DW 60.400 usec
DE 7.50 usec
TE 300.0 K
D1 1.00000000 sec

----- CHANNEL f1 -----
NUC1 1H
P1 9.00 usec
PL1 0.00 dB
SF01 400.2024714 MHz
SI 32768
SF 400.2000000 MHz
WDW EM
SSB 0
LB 0.30 Hz
GB 0
PC 1.00
```

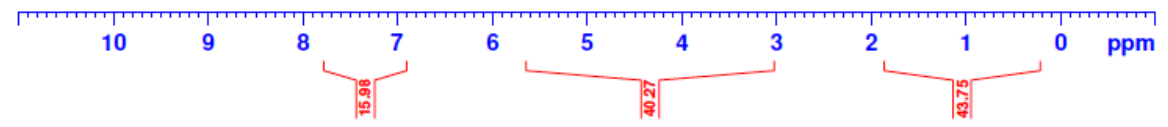

9c

Instrument DQX400  
Chemist BH  
Group MGM  
BH4148 F2 MeOD  
c13acq.au MeOD (E:ANMR2011) mgmgrp 22

NMR@CHEM.OX

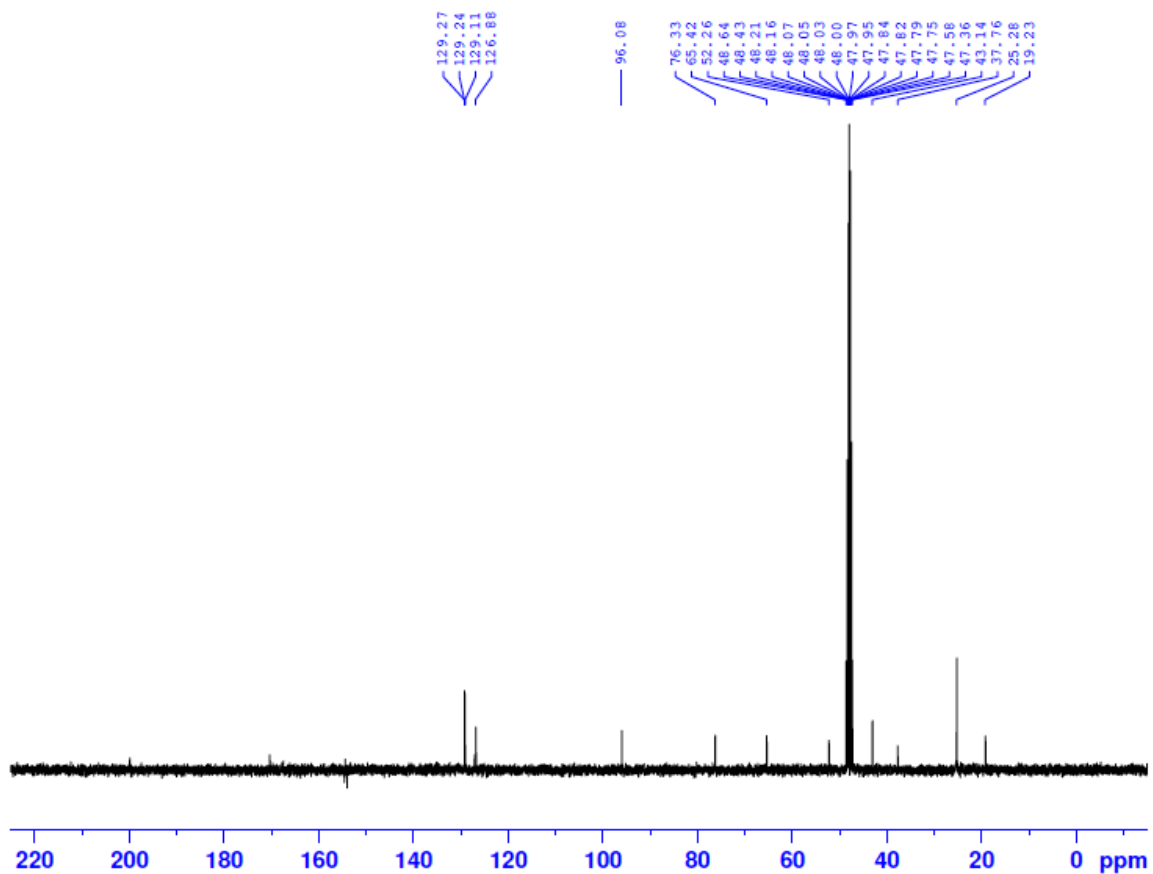

```
NAME Feb09-2011-22
EXPNO 2
PROCNO 1
Date_ 20110210
Time 5.07
INSTRUM av400
PROBHD 5 mm QNP 1H/13
PULPROG zgpg30
TD 32768
SOLVENT MeOD
NS 256
DS 4
SWH 26178.010 Hz
FIDRES 0.798889 Hz
AQ 0.6259188 sec
RG 32768
DW 19.100 usec
DE 7.50 usec
TE 300.0 K
D1 1.00000000 sec
D11 0.03000000 sec
TD0 1

----- CHANNEL f1 -----
NUC1 13C
P1 9.50 usec
PL1 0.00 dB
SFO1 100.6403931 MHz

----- CHANNEL f2 -----
CPDPRG2 waltz16
NUC2 1H
PCPD2 80.00 usec
PL2 0.00 dB
PL12 19.00 dB
PL13 25.00 dB
SFO2 400.2016008 MHz
SI 32768
SF 100.6303300 MHz
WDW EM
SSB 0
LB 1.00 Hz
GB 0
PC 1.40
```

Instrument DQX400  
 Chemist BH  
 Group MGM  
 BH3184 F2  
 h1acq.au CDC13 {C:NMR} mgmgrp 42

NMROCHEM.OX

29340  
29292  
29244  
29196  
29148  
29100  
29052  
29004  
28956  
28908  
28860  
28812

28465  
28417  
28369  
28321  
28273  
28225  
28177  
28129  
28081  
28033  
27985  
27937  
27889  
27841  
27793  
27745  
27697  
27649  
27601  
27553  
27505  
27457  
27409  
27361  
27313  
27265  
27217  
27169  
27121  
27073  
27025  
26977  
26929  
26881  
26833  
26785  
26737  
26689  
26641  
26593  
26545  
26497  
26449  
26401  
26353  
26305  
26257  
26209  
26161  
26113  
26065  
26017  
25969  
25921  
25873  
25825  
25777  
25729  
25681  
25633  
25585  
25537  
25489  
25441  
25393  
25345  
25297  
25249  
25201  
25153  
25105  
25057  
25009  
24961  
24913  
24865  
24817  
24769  
24721  
24673  
24625  
24577  
24529  
24481  
24433  
24385  
24337  
24289  
24241  
24193  
24145  
24097  
24049  
23999  
23951  
23903  
23855  
23807  
23759  
23711  
23663  
23615  
23567  
23519  
23471  
23423  
23375  
23327  
23279  
23231  
23183  
23135  
23087  
23039  
22991  
22943  
22895  
22847  
22799  
22751  
22703  
22655  
22607  
22559  
22511  
22463  
22415  
22367  
22319  
22271  
22223  
22175  
22127  
22079  
22031  
21983  
21935  
21887  
21839  
21791  
21743  
21695  
21647  
21599  
21551  
21503  
21455  
21407  
21359  
21311  
21263  
21215  
21167  
21119  
21071  
21023  
20975  
20927  
20879  
20831  
20783  
20735  
20687  
20639  
20591  
20543  
20495  
20447  
20399  
20351  
20303  
20255  
20207  
20159  
20111  
20063  
20015  
19967  
19919  
19871  
19823  
19775  
19727  
19679  
19631  
19583  
19535  
19487  
19439  
19391  
19343  
19295  
19247  
19199  
19151  
19103  
19055  
19007  
18959  
18911  
18863  
18815  
18767  
18719  
18671  
18623  
18575  
18527  
18479  
18431  
18383  
18335  
18287  
18239  
18191  
18143  
18095  
18047  
17999  
17951  
17903  
17855  
17807  
17759  
17711  
17663  
17615  
17567  
17519  
17471  
17423  
17375  
17327  
17279  
17231  
17183  
17135  
17087  
17039  
16991  
16943  
16895  
16847  
16799  
16751  
16703  
16655  
16607  
16559  
16511  
16463  
16415  
16367  
16319  
16271  
16223  
16175  
16127  
16079  
16031  
15983  
15935  
15887  
15839  
15791  
15743  
15695  
15647  
15599  
15551  
15503  
15455  
15407  
15359  
15311  
15263  
15215  
15167  
15119  
15071  
15023  
14975  
14927  
14879  
14831  
14783  
14735  
14687  
14639  
14591  
14543  
14495  
14447  
14399  
14351  
14303  
14255  
14207  
14159  
14111  
14063  
14015  
13967  
13919  
13871  
13823  
13775  
13727  
13679  
13631  
13583  
13535  
13487  
13439  
13391  
13343  
13295  
13247  
13199  
13151  
13103  
13055  
13007  
12959  
12911  
12863  
12815  
12767  
12719  
12671  
12623  
12575  
12527  
12479  
12431  
12383  
12335  
12287  
12239  
12191  
12143  
12095  
12047  
11999  
11951  
11903  
11855  
11807  
11759  
11711  
11663  
11615  
11567  
11519  
11471  
11423  
11375  
11327  
11279  
11231  
11183  
11135  
11087  
11039  
10991  
10943  
10895  
10847  
10799  
10751  
10703  
10655  
10607  
10559  
10511  
10463  
10415  
10367  
10319  
10271  
10223  
10175  
10127  
10079  
10031  
9983  
9935  
9887  
9839  
9791  
9743  
9695  
9647  
9599  
9551  
9503  
9455  
9407  
9359  
9311  
9263  
9215  
9167  
9119  
9071  
9023  
8975  
8927  
8879  
8831  
8783  
8735  
8687  
8639  
8591  
8543  
8495  
8447  
8399  
8351  
8303  
8255  
8207  
8159  
8111  
8063  
8015  
7967  
7919  
7871  
7823  
7775  
7727  
7679  
7631  
7583  
7535  
7487  
7439  
7391  
7343  
7295  
7247  
7199  
7151  
7103  
7055  
7007  
6959  
6911  
6863  
6815  
6767  
6719  
6671  
6623  
6575  
6527  
6479  
6431  
6383  
6335  
6287  
6239  
6191  
6143  
6095  
6047  
6000  
5952  
5904  
5856  
5808  
5760  
5712  
5664  
5616  
5568  
5520  
5472  
5424  
5376  
5328  
5280  
5232  
5184  
5136  
5088  
5040  
4992  
4944  
4896  
4848  
4800  
4752  
4704  
4656  
4608  
4560  
4512  
4464  
4416  
4368  
4320  
4272  
4224  
4176  
4128  
4080  
4032  
3984  
3936  
3888  
3840  
3792  
3744  
3696  
3648  
3600  
3552  
3504  
3456  
3408  
3360  
3312  
3264  
3216  
3168  
3120  
3072  
3024  
2976  
2928  
2880  
2832  
2784  
2736  
2688  
2640  
2592  
2544  
2496  
2448  
2400  
2352  
2304  
2256  
2208  
2160  
2112  
2064  
2016  
1968  
1920  
1872  
1824  
1776  
1728  
1680  
1632  
1584  
1536  
1488  
1440  
1392  
1344  
1296  
1248  
1200  
1152  
1104  
1056  
1008  
960  
912  
864  
816  
768  
720  
672  
624  
576  
528  
480  
432  
384  
336  
288  
240  
192  
144  
96  
48  
0  
-48  
-96  
-144  
-192  
-240  
-288  
-336  
-384  
-432  
-480  
-528  
-576  
-624  
-672  
-720  
-768  
-816  
-864  
-912  
-960  
-1008  
-1056  
-1104  
-1152  
-1200  
-1248  
-1296  
-1344  
-1392  
-1440  
-1488  
-1536  
-1584  
-1632  
-1680  
-1728  
-1776  
-1824  
-1872  
-1920  
-1968  
-2016  
-2064  
-2112  
-2160  
-2208  
-2256  
-2304  
-2352  
-2400  
-2448  
-2496  
-2544  
-2592  
-2640  
-2688  
-2736  
-2784  
-2832  
-2880  
-2928  
-2976  
-3024  
-3072  
-3120  
-3168  
-3216  
-3264  
-3312  
-3360  
-3408  
-3456  
-3504  
-3552  
-3600  
-3648  
-3696  
-3744  
-3792  
-3840  
-3888  
-3936  
-3984  
-4032  
-4080  
-4128  
-4176  
-4224  
-4272  
-4320  
-4368  
-4416  
-4464  
-4512  
-4560  
-4608  
-4656  
-4704  
-4752  
-4800  
-4848  
-4896  
-4944  
-4992  
-5040  
-5088  
-5136  
-5184  
-5232  
-5280  
-5328  
-5376  
-5424  
-5472  
-5520  
-5568  
-5616  
-5664  
-5712  
-5760  
-5808  
-5856  
-5904  
-5952  
-6000  
-6048  
-6096  
-6144  
-6192  
-6240  
-6288  
-6336  
-6384  
-6432  
-6480  
-6528  
-6576  
-6624  
-6672  
-6720  
-6768  
-6816  
-6864  
-6912  
-6960  
-7008  
-7056  
-7104  
-7152  
-7200  
-7248  
-7296  
-7344  
-7392  
-7440  
-7488  
-7536  
-7584  
-7632  
-7680  
-7728  
-7776  
-7824  
-7872  
-7920  
-7968  
-8016  
-8064  
-8112  
-8160  
-8208  
-8256  
-8304  
-8352  
-8400  
-8448  
-8496  
-8544  
-8592  
-8640  
-8688  
-8736  
-8784  
-8832  
-8880  
-8928  
-8976  
-9024  
-9072  
-9120  
-9168  
-9216  
-9264  
-9312  
-9360  
-9408  
-9456  
-9504  
-9552  
-9600  
-9648  
-9696  
-9744  
-9792  
-9840  
-9888  
-9936  
-9984  
-10032  
-10080  
-10128  
-10176  
-10224  
-10272  
-10320  
-10368  
-10416  
-10464  
-10512  
-10560  
-10608  
-10656  
-10704  
-10752  
-10800  
-10848  
-10896  
-10944  
-10992  
-11040  
-11088  
-11136  
-11184  
-11232  
-11280  
-11328  
-11376  
-11424  
-11472  
-11520  
-11568  
-11616  
-11664  
-11712  
-11760  
-11808  
-11856  
-11904  
-11952  
-12000  
-12048  
-12096  
-12144  
-12192  
-12240  
-12288  
-12336  
-12384  
-12432  
-12480  
-12528  
-12576  
-12624  
-12672  
-12720  
-12768  
-12816  
-12864  
-12912  
-12960  
-13008  
-13056  
-13104  
-13152  
-13200  
-13248  
-13296  
-13344  
-13392  
-13440  
-13488  
-13536  
-13584  
-13632  
-13680  
-13728  
-13776  
-13824  
-13872  
-13920  
-13968  
-14016  
-14064  
-14112  
-14160  
-14208  
-14256  
-14304  
-14352  
-14400  
-14448  
-14496  
-14544  
-14592  
-14640  
-14688  
-14736  
-14784  
-14832  
-14880  
-14928  
-14976  
-15024  
-15072  
-15120  
-15168  
-15216  
-15264  
-15312  
-15360  
-15408  
-15456  
-15504  
-15552  
-15600  
-15648  
-15696  
-15744  
-15792  
-15840  
-15888  
-15936  
-15984  
-16032  
-16080  
-16128  
-16176  
-16224  
-16272  
-16320  
-16368  
-16416  
-16464  
-16512  
-16560  
-16608  
-16656  
-16704  
-16752  
-16800  
-16848  
-16896  
-16944  
-16992  
-17040  
-17088  
-17136  
-17184  
-17232  
-17280  
-17328  
-17376  
-17424  
-17472  
-17520  
-17568  
-17616  
-17664  
-17712  
-17760  
-17808  
-17856  
-17904  
-17952  
-18000  
-18048  
-18096  
-18144  
-18192  
-18240  
-18288  
-18336  
-18384  
-18432  
-18480  
-18528  
-18576  
-18624  
-18672  
-18720  
-18768  
-18816  
-18864  
-18912  
-18960  
-19008  
-19056  
-19104  
-19152  
-19200  
-19248  
-19296  
-19344  
-19392  
-19440  
-19488  
-19536  
-19584  
-19632  
-19680  
-19728  
-19776  
-19824  
-19872  
-19920  
-19968  
-20016  
-20064  
-20112  
-20160  
-20208  
-20256  
-20304  
-20352  
-20400  
-20448  
-20496  
-20544  
-20592  
-20640  
-20688  
-20736  
-20784  
-20832  
-20880  
-20928  
-20976  
-21024  
-21072  
-21120  
-21168  
-21216  
-21264  
-21312  
-21360  
-21408  
-21456  
-21504  
-21552  
-21600  
-21648  
-21696  
-21744  
-21792  
-21840  
-21888  
-21936  
-21984  
-22032  
-22080  
-22128  
-22176  
-22224  
-22272  
-22320  
-22368  
-22416  
-22464  
-22512  
-22560  
-22608  
-22656  
-22704  
-22752  
-22800  
-22848  
-22896  
-22944  
-22992  
-23040  
-23088  
-23136  
-23184  
-23232  
-23280  
-23328  
-23376  
-23424  
-23472  
-23520  
-23568  
-23616  
-23664  
-23712  
-23760  
-23808  
-23856  
-23904  
-23952  
-24000  
-24048  
-24096  
-24144  
-24192  
-24240  
-24288  
-24336  
-24384  
-24432  
-24480  
-24528  
-24576  
-24624  
-24672  
-24720  
-24768  
-24816  
-24864  
-24912  
-24960  
-25008  
-25056  
-25104  
-25152  
-25200  
-25248  
-25296  
-25344  
-25392  
-25440  
-25488  
-25536  
-25584  
-25632  
-25680  
-25728  
-25776  
-25824  
-25872  
-25920  
-25968  
-26016  
-26064  
-26112  
-26160  
-26208  
-26256  
-26304  
-26352  
-26400  
-26448  
-26496  
-26544  
-26592  
-26640  
-26688  
-26736  
-26784  
-26832  
-26880  
-26928  
-26976  
-27024  
-27072  
-27120  
-27168  
-27216  
-27264  
-27312  
-27360  
-27408  
-27456  
-27504  
-27552  
-27600  
-27648  
-27696  
-27744  
-27792  
-27840  
-27888  
-27936  
-27984  
-28032  
-28080  
-28128  
-28176  
-28224  
-28272  
-28320  
-28368  
-28416  
-28464  
-28512  
-28560  
-28608  
-28656  
-28704  
-28752  
-28800  
-28848  
-28896  
-28944  
-28992  
-29040  
-29088  
-29136  
-29184  
-29232  
-29280  
-29328  
-29376  
-29424  
-29472  
-29520  
-29568  
-29616  
-29664  
-29712  
-29760  
-29808  
-29856  
-29904  
-29952  
-30000  
-30048  
-30096  
-30144  
-30192  
-30240  
-30288  
-30336  
-30384  
-30432  
-30480  
-30528  
-30576  
-30624  
-30672  
-30720  
-30768  
-30816  
-30864  
-30912  
-30960  
-31008  
-31056  
-31104  
-31152  
-31200  
-31248  
-31296  
-31344  
-31392  
-31440  
-31488  
-31536  
-31584  
-31632  
-31680  
-31728  
-31776  
-31824  
-31872  
-31920  
-31968  
-32016  
-32064  
-32112  
-32160  
-32208  
-32256  
-32304  
-32352  
-32400  
-32448  
-32496  
-32544  
-32592  
-32640  
-32688  
-32736  
-32784  
-32832  
-32880  
-32928  
-32976  
-33024  
-33072  
-33120  
-33168  
-33216  
-33264  
-33312  
-33360  
-33408  
-33456  
-33504  
-33552  
-33600  
-33648  
-33696  
-33744  
-33792  
-33840  
-33888  
-33936  
-33984  
-34032  
-34080  
-34128  
-34176  
-34224  
-34272  
-34320  
-34368  
-34416  
-34464  
-34512  
-34560  
-34608  
-34656  
-34704  
-34752  
-34800  
-34848  
-34896  
-34944  
-34992  
-35040  
-35088  
-35136  
-35184  
-35232  
-35280  
-35328  
-35376  
-35424  
-35472  
-35520  
-35568  
-35616  
-35664  
-35712  
-35760  
-35808  
-35856  
-35904  
-35952  
-36000  
-36048  
-36096  
-36144  
-36192  
-36240  
-36288  
-36336  
-36384  
-36432  
-36480  
-36528  
-36576  
-36624  
-36672  
-36720  
-36768  
-36816  
-36864  
-36912  
-36960  
-37008  
-37056  
-37104  
-37152  
-37200  
-37248  
-37296  
-37344  
-37392  
-37440  
-37488  
-37536  
-37584  
-37632  
-37680  
-37728  
-37776  
-37824  
-37872  
-37920  
-37968  
-38016  
-38064  
-38112  
-38160  
-38208  
-38256  
-38304  
-38352  
-38400  
-38448  
-38496  
-38544  
-38592  
-38640  
-38688  
-38736  
-38784  
-38832  
-38880  
-38928  
-38976  
-39024  
-39072  
-39120  
-39168  
-39216  
-39264  
-39312  
-39360  
-39408  
-39456  
-39504  
-39552  
-39600  
-39648  
-39696  
-39744  
-39792  
-39840  
-39888  
-39936  
-39984  
-40032  
-40080  
-40128  
-40176  
-40224  
-40272  
-40320  
-40368  
-40416  
-40464  
-40512  
-40560  
-40608  
-40656  
-40704  
-40752  
-40800  
-40848  
-40896  
-40944  
-40992  
-41040  
-41088  
-41136  
-41184  
-41232  
-41280  
-41328  
-41376  
-41424  
-41472  
-41520  
-41568  
-41616  
-41664  
-41712  
-41760  
-41808  
-41856  
-41904  
-41952  
-42000  
-42048  
-42096  
-42144  
-42192  
-42240  
-42288  
-42336  
-42384  
-42432  
-42480  
-42528  
-42576  
-42624  
-42672  
-42720  
-42768  
-42816  
-42864  
-42912  
-42960  
-43008  
-43056  
-43104  
-43152  
-43200  
-43248  
-43296  
-43344  
-43392  
-43440  
-43488  
-43536  
-43584  
-43632  
-43680  
-43728  
-43776  
-43824  
-43872  
-43920  
-43968  
-44016  
-44064  
-44112  
-44160  
-44208  
-44256  
-44304  
-44352  
-44400  
-44448  
-44496  
-44544  
-44592  
-44640  
-44688  
-44736  
-44784  
-44832  
-44880  
-44928  
-44976  
-45024  
-45072  
-45120  
-45168  
-45216  
-45264  
-45312  
-45360  
-45408  
-45456  
-45504  
-45552  
-45600  
-45648  
-45696  
-45744  
-45792  
-45840  
-45888  
-45936  
-45984  
-46032  
-46080  
-46128  
-46176  
-46224  
-46272  
-46320  
-46368  
-46416  
-46464  
-46512  
-46560  
-46608  
-46656  
-46704  
-46752  
-46800  
-46848  
-46896  
-46944  
-46992  
-47040  
-47088  
-47136  
-47184  
-47232  
-47280  
-47328  
-47376  
-47424  
-47472  
-47520  
-47568  
-47616  
-47664  
-47712  
-47760  
-47808  
-47856  
-47904  
-47952  
-48000  
-48048  
-48096  
-48144  
-48192  
-48240  
-48288  
-48336  
-48384  
-48432  
-48480  
-48528  
-48576  
-48624  
-48672  
-48720  
-48768  
-48816  
-48864  
-48912  
-48960  
-49008  
-49056  
-49104  
-49152  
-49200  
-49248  
-49296  
-49344  
-49392  
-49440  
-49488  
-49536  
-49584  
-49632  
-49680  
-49728  
-49776  
-49824  
-49872  
-49920  
-49968  
-50016  
-50064  
-50112  
-50160  
-502



Instrument DQX400  
 Chemist BH  
 Group MGM  
 BH3184 F2  
 c13acq.au CDC13 (C:NMR) mgmgrp 42

NMR@CHEM.OX

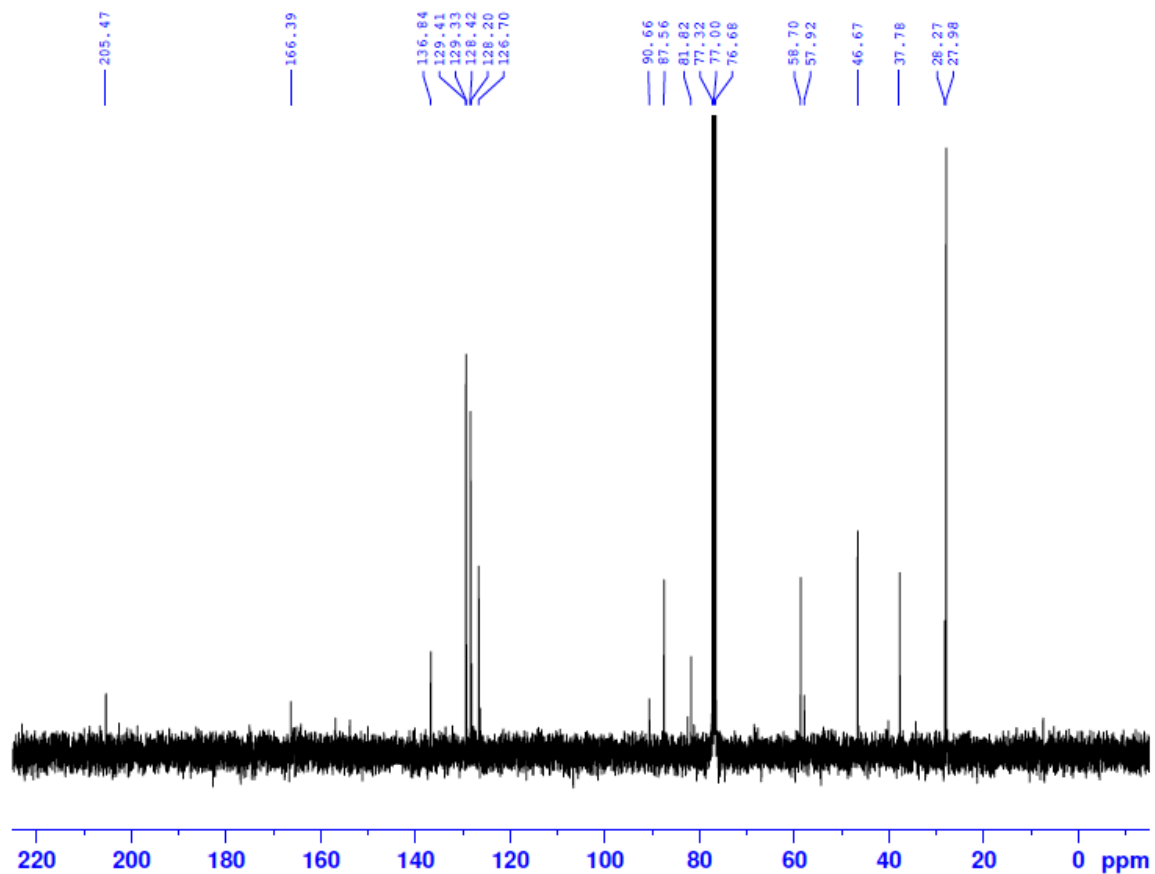

```

NAME      Aug10-2010-42
EXPNO     2
PROCNO    1
Date_     20100811
Time      0.25
INSTRUM   av400
PROBHD    5 mm QNP 1H/13
PULPROG   zgpg30
TD        32768
SOLVENT   CDC13
NS        256
DS        4
SWH       26178.010 Hz
FIDRES    0.798889 Hz
AQ        0.6259188 sec
RG        32768
DW        19.100 usec
DE        7.50 usec
TE        300.0 K
D1        1.00000000 sec
D11       0.03000000 sec
TD0       1
  
```

```

----- CHANNEL f1 -----
NUC1      13C
P1        9.50 usec
PL1       0.00 dB
SFO1     100.6403931 MHz

----- CHANNEL f2 -----
CPDPRG2   waltz16
NUC2      1H
PCPD2     80.00 usec
PL2       0.00 dB
PL12     19.00 dB
PL13     25.00 dB
SFO2     400.2016008 MHz
SI        32768
SF       100.6303718 MHz
WDW       EM
SSB       0
LB        1.00 Hz
GB        0
PC        1.40
  
```

Instrument DQX400  
 Chemist BH  
 Group MGM  
 BH420  
 h1acq.au CDC13 (C-NMR) mgmarp 37

NMROCHEM.OX

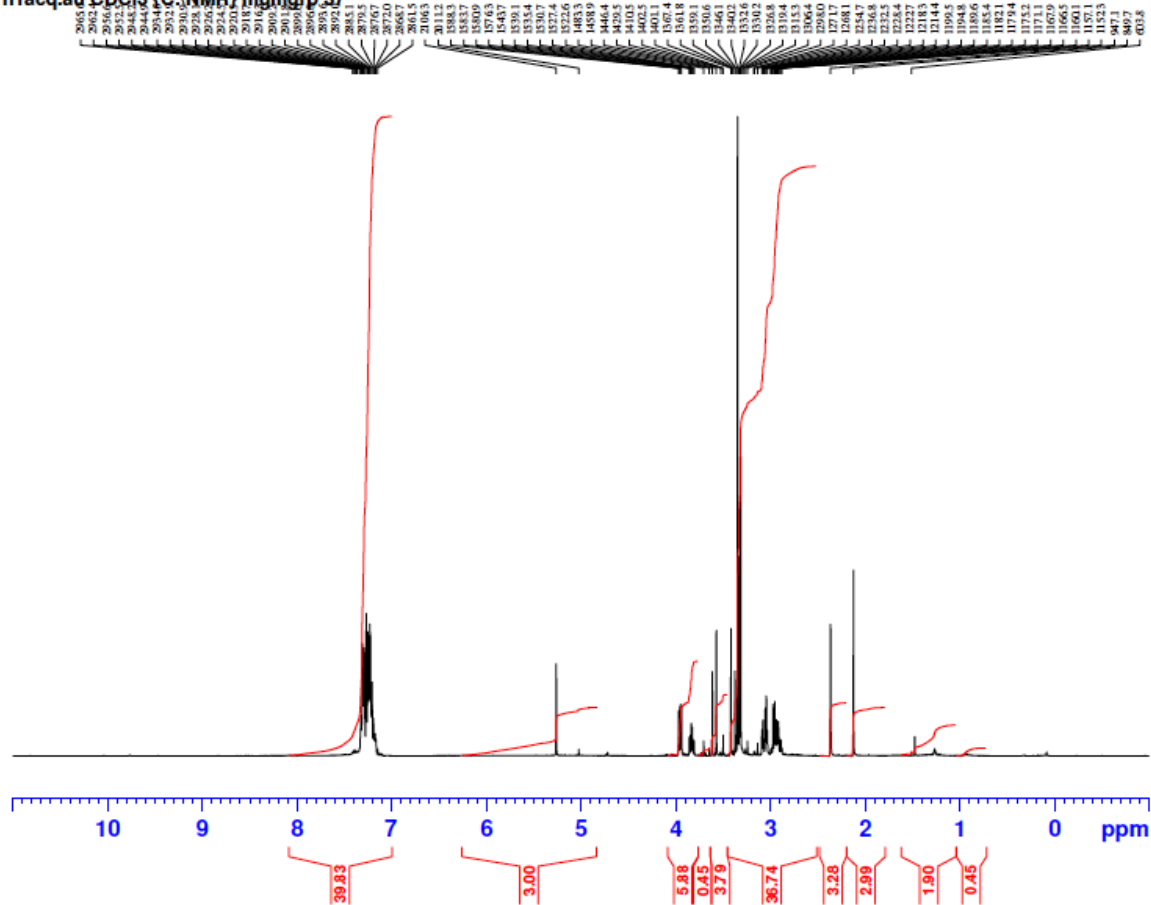

```

NAME      Sep14-2010-37
EXPNO     1
PROCNO    1
Date_     20100914
Time      15.35
INSTRUM   av400
PROBHD    5 mm QNP 1H/13
PULPROG   zg60
TD         65536
SOLVENT   CDC13
NS         16
DS         2
SWH        8278.146 Hz
FIDRES     0.126314 Hz
AQ         3.9584243 sec
RG         228.1
DW         60.400 usec
DE         7.50 usec
TE         300.0 K
D1         1.00000000 sec

----- CHANNEL f1 -----
NUC1       13C
P1         9.00 usec
PL1        0.00 dB
SFO1       400.2024714 MHz
SI         32768
SF         400.2000028 MHz
WDW        EM
SSB        0
LB         0.30 Hz
GB         0
PC         1.00
  
```

Instrument DQX400  
 Chemist BH  
 Group MGM  
 BH420  
 c13acq.au CDC13 (C:NMR) mgmgrp 37

NMR@CHEM.OX

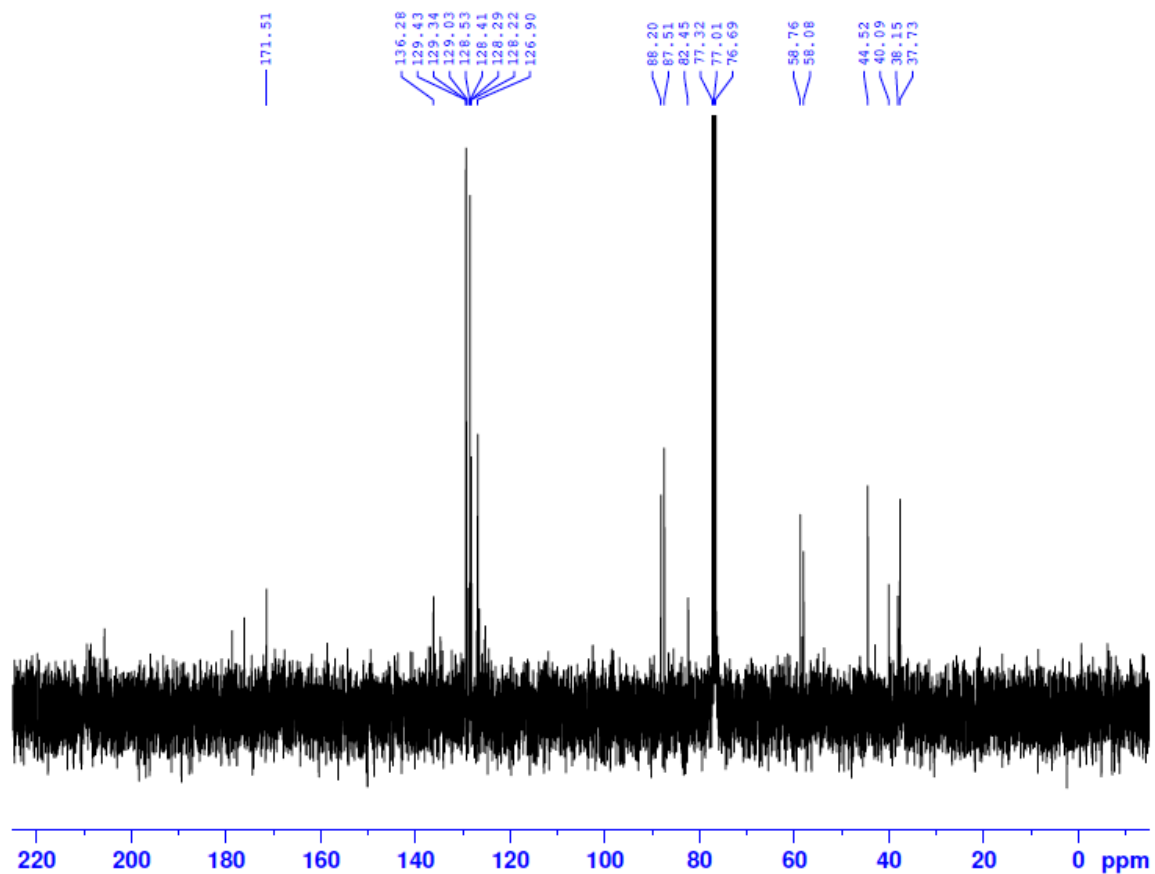

```

NAME      Sep14-2010-37
EXPNO     2
PROCNO    1
Date_     20100914
Time      15.43
INSTRUM   av400
PROBHD    5 mm QNP 1H/13
PULPROG   zgpg30
TD         32768
SOLVENT   CDC13
NS         256
DS         4
SWH        26178.010 Hz
FIDRES     0.798889 Hz
AQ         0.6259188 sec
RG         32768
DW         19.100 usec
DE         7.50 usec
TE         300.0 K
D1         1.00000000 sec
D11        0.03000000 sec
TD0        1

----- CHANNEL f1 -----
NUC1       13C
P1         9.50 usec
PL1        0.00 dB
SFO1       100.6403931 MHz

----- CHANNEL f2 -----
CPDPRG2   waltz16
NUC2       1H
PCPD2     80.00 usec
PL2        0.00 dB
PL12      19.00 dB
PL13      25.00 dB
SFO2       400.2016008 MHz
SI         32768
SF         100.6303718 MHz
WDW        EM
SSB        0
LB         1.00 Hz
GB         0
PC         1.40
  
```

13a

Instrument DQX400  
Chemist BH  
Group MGM  
BH3154  
h1acq.au CDCI3 {C:NMR} mgmgrp 2

200.1

9663.2  
9648.2  
9648.1  
9645.3  
9233.3  
9228.3  
9090.8  
9090.9  
8990.1  
8833.6  
8236.4  
8175.3  
8131.1  
8121.1  
8072.6  
8065.4  
8051.5  
792.2  
759.3  
755.9  
755.8  
690.0  
690.0  
596.1  
585.9  
509.8  
509.8  
509.8  
414.4  
509.9  
509.9  
512.7  
512.7  
307.1  
488.8  
484.1

NMROCHEM.OX

NAME Ju127-2010-2  
EXPNO 1  
PROCNO 1  
Date\_ 20100727  
Time 9.54  
INSTRUM av400  
PROBHD 5 mm QNP 1H/13  
PULPROG zg60  
TD 65536  
SOLVENT CDCI3  
NS 16  
DS 2  
SWH 8278.146 Hz  
FIDRES 0.126314 Hz  
AQ 3.9584243 sec  
RG 90.5  
DW 60.400 usec  
DE 7.50 usec  
TE 300.0 K  
D1 1.00000000 sec

----- CHANNEL f1 -----  
NUC1 1H  
P1 9.00 usec  
PL1 0.00 dB  
SFO1 400.2024714 MHz  
SI 32768  
SF 400.2000028 MHz  
WDW EM  
SSB 0  
LB 0.30 Hz  
GB 0  
PC 1.00

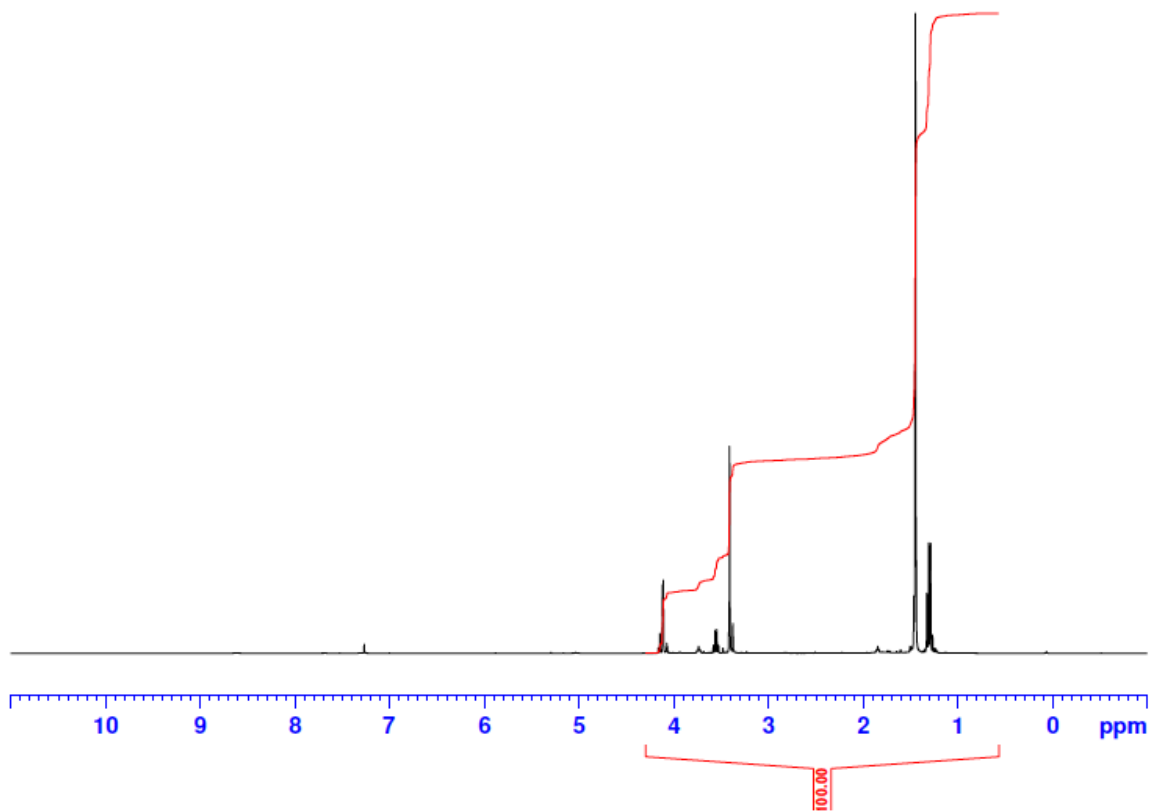

13a

Instrument DQX400  
Chemist BH  
Group MGM  
BH3154  
c13acq.au CDC13 (C:NMR) mgmgrp 2

NMR@CHEM.OX

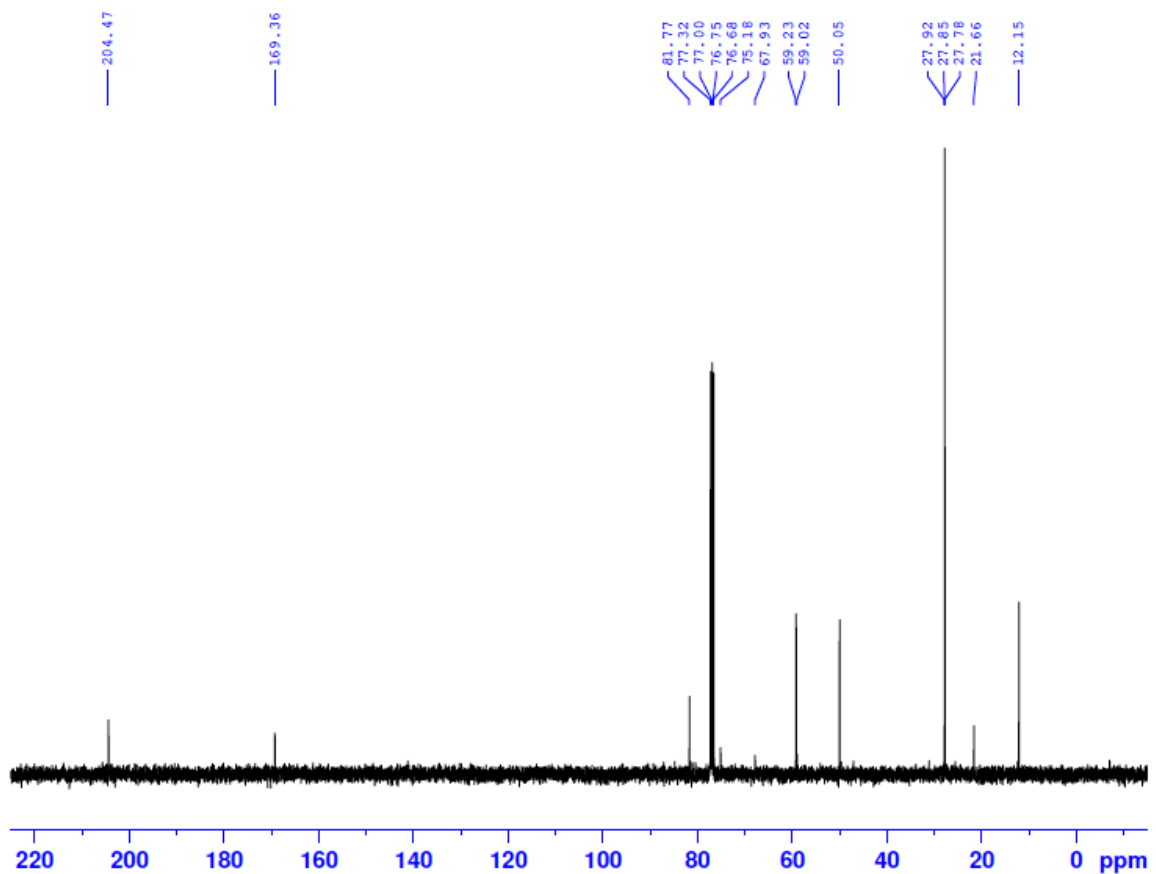

```
NAME Jul27-2010-2
EXPNO 2
PROCNO 1
Date_ 20100727
Time 10.02
INSTRUM av400
PROBHD 5 mm QNP 1H/13
PULPROG zgpg30
TD 32768
SOLVENT CDC13
NS 256
DS 4
SWH 26178.010 Hz
FIDRES 0.798889 Hz
AQ 0.6259188 sec
RG 32768
DW 19.100 usec
DE 7.50 usec
TE 300.0 K
D1 1.00000000 sec
D11 0.03000000 sec
TD0 1

----- CHANNEL f1 -----
NUC1 13C
P1 9.50 usec
PL1 0.00 dB
SFO1 100.6403931 MHz

----- CHANNEL f2 -----
CPDPRG2 waltz16
NUC2 1H
PCPD2 80.00 usec
PL2 0.00 dB
PL12 19.00 dB
PL13 25.00 dB
SFO2 400.2016008 MHz
SI 32768
SF 100.6303718 MHz
WDW EM
SSB 0
LB 1.00 Hz
GB 0
PC 1.40
```

13b

Instrument DQX400  
Chemist BH  
Group MGM  
BH4106  
h1acq.au CDCI3 {C:NMR} mgmgrp 21

NMROCHEM.OX

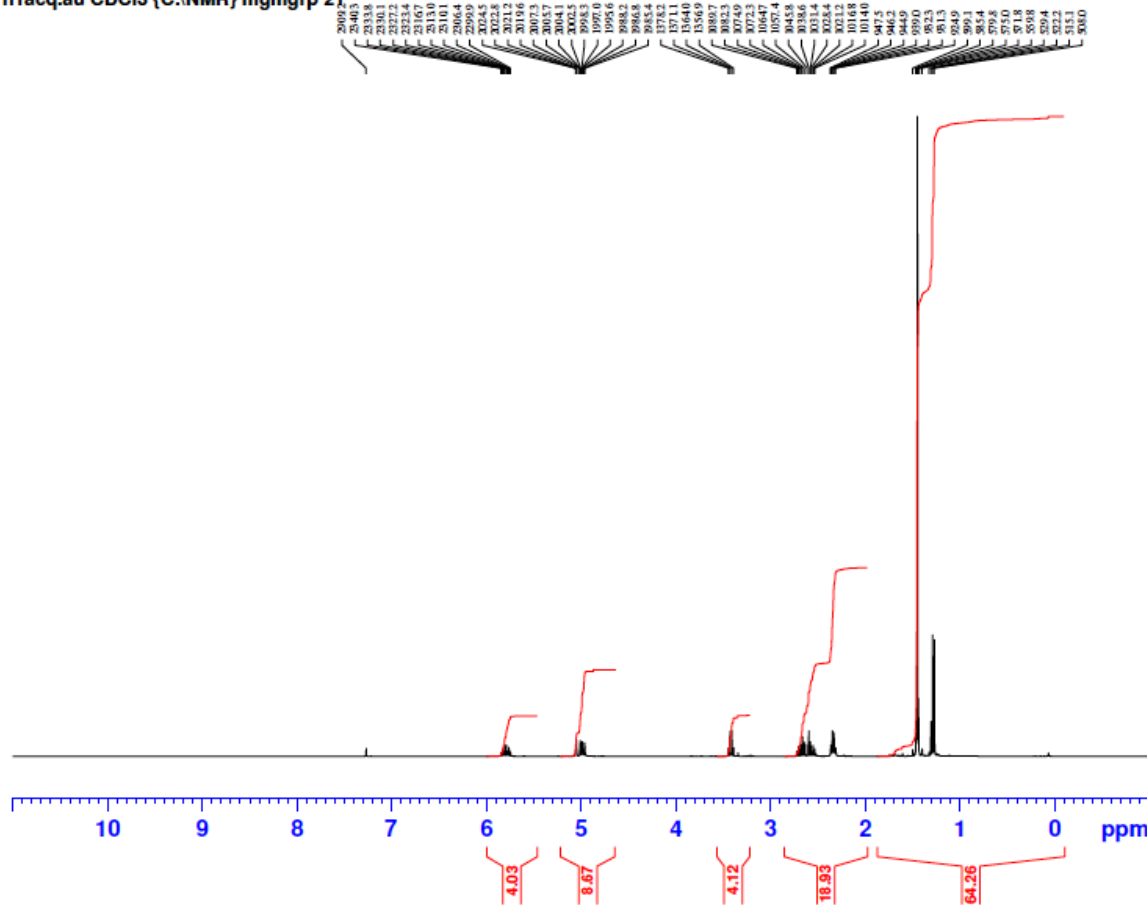

```

NAME      Dec17-2010-21
EXPNO     1
PROCNO    1
Date_     20101217
Time      17.05
INSTRUM   av400
PROBHD    5 mm QNP 1H/13
PULPROG   zg60
TD         65536
SOLVENT   CDCI3
NS         16
DS         2
SWH       8278.146 Hz
FIDRES    0.126314 Hz
AQ        3.9584243 sec
RG         40.3
DW        60.400 usec
DE        7.50 usec
TE        300.0 K
D1        1.00000000 sec

----- CHANNEL f1 -----
NUC1      1H
P1        9.00 usec
PL1       0.00 dB
SFO1     400.2024714 MHz
SI        32768
SF        400.2000028 MHz
WDW       EM
SSB       0
LB        0.30 Hz
GB        0
PC        1.00
    
```

13b

Instrument DQX400  
Chemist BH  
Group MGM  
BH4106  
c13acq.au CDC13 (C:NMR) mgmgrp 21

NMR@CHEM.OX

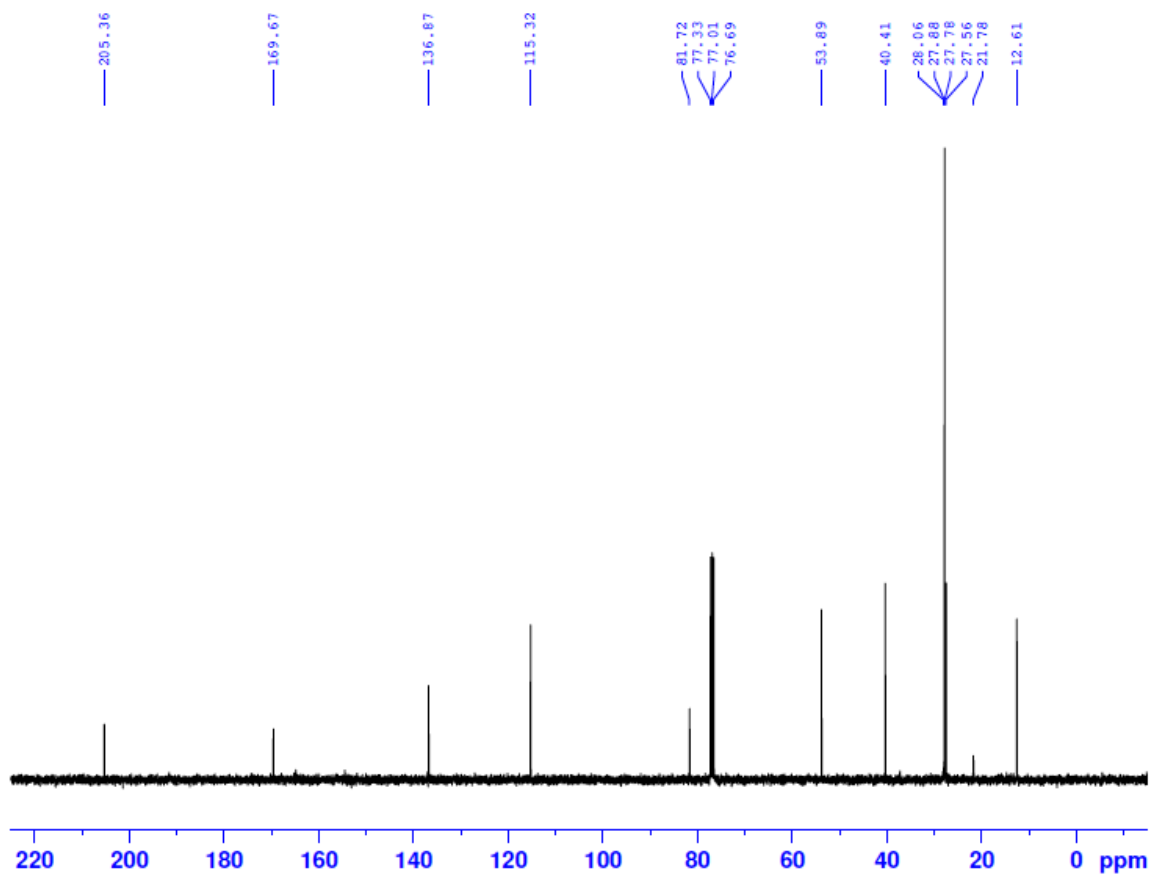

```
NAME      Dec17-2010-21
EXPNO     2
PROCNO    1
Date_     20101217
Time      17.13
INSTRUM   av400
PROBHD    5 mm QNP 1H/13
PULPROG   zgpg30
TD         32768
SOLVENT   CDC13
NS         256
DS         4
SWH        26178.010 Hz
FIDRES     0.798889 Hz
AQ         0.6259188 sec
RG         32768
DW         19.100 usec
DE         7.50 usec
TE         300.0 K
D1         1.00000000 sec
D11        0.03000000 sec
TD0        1

----- CHANNEL f1 -----
NUC1       13C
P1         9.50 usec
PL1        0.00 dB
SFO1       100.6403931 MHz

----- CHANNEL f2 -----
CPDPRG2   waltz16
NUC2       1H
PCPD2     80.00 usec
PL2        0.00 dB
PL12       19.00 dB
PL13       25.00 dB
SFO2       400.2016008 MHz
SI         32768
SF         100.6303718 MHz
WDW        EM
SSB        0
LB         1.00 Hz
GB         0
PC         1.40
```

13c

Instrument DQX400  
Chemist BH  
Group MGM  
BH4134  
h1acq.au CDC13 {C:NMR} mgmgrp 56

NMROCHEM.OX

NAME Jan31-2011-56  
EXPNO 1  
PROCNO 1  
Date\_ 20110201  
Time 2.20  
INSTRUM av400  
PROBHD 5 mm QNP 1H/13  
PULPROG zg60  
TD 65536  
SOLVENT CDC13  
NS 16  
DS 2  
SWH 8278.146 Hz  
FIDRES 0.126314 Hz  
AQ 3.9584243 sec  
RG 90.5  
DW 60.400 usec  
DE 7.50 usec  
TE 300.0 K  
D1 1.00000000 sec

----- CHANNEL f1 -----  
NUC1 1H  
P1 9.00 usec  
PL1 0.00 dB  
SFO1 400.2024714 MHz  
SI 32768  
SF 400.2000028 MHz  
WDW EM  
SSB 0  
LB 0.30 Hz  
GB 0  
PC 1.00

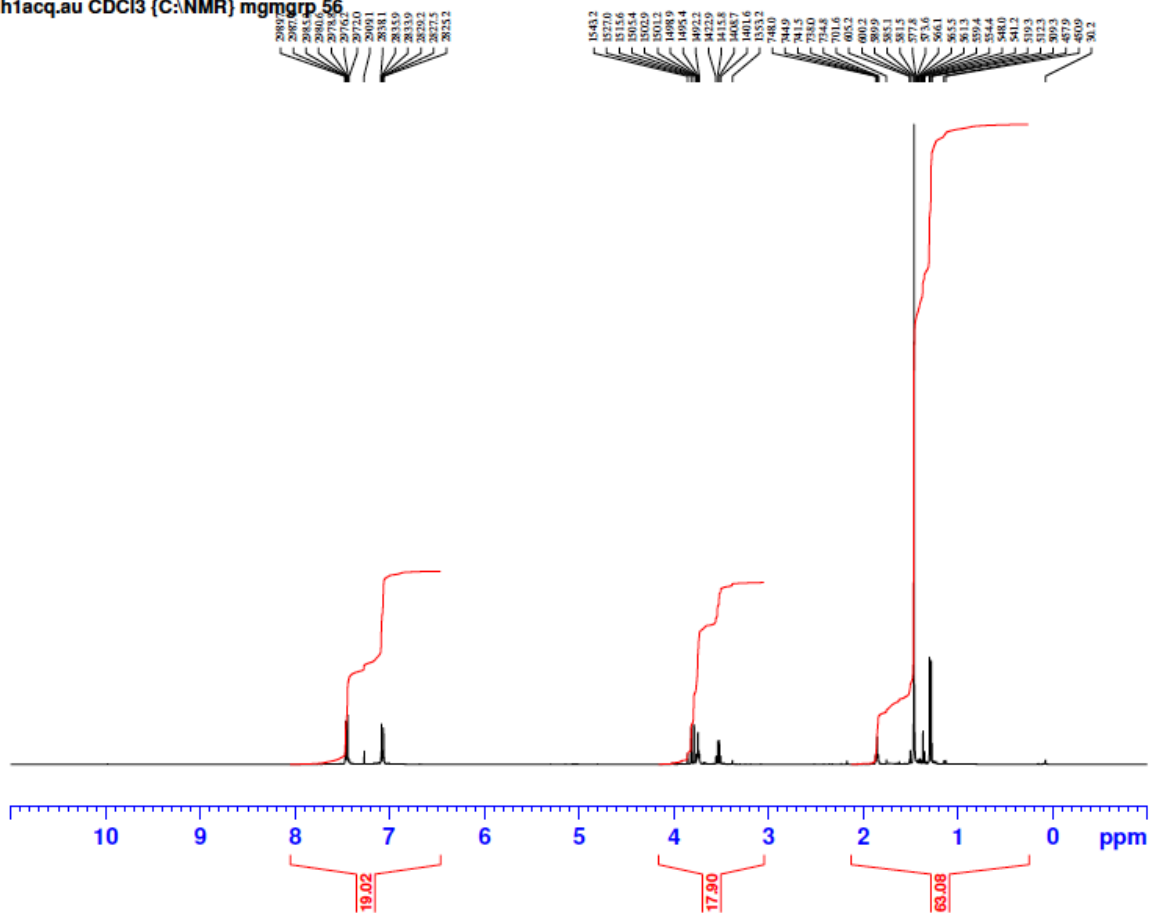



13d

Instrument DQX400  
Chemist BH  
Group MGM  
BH4158  
h1acq.au CDC13 (F:NMR2011) mgmgrp 36

NMROCHEM.OX

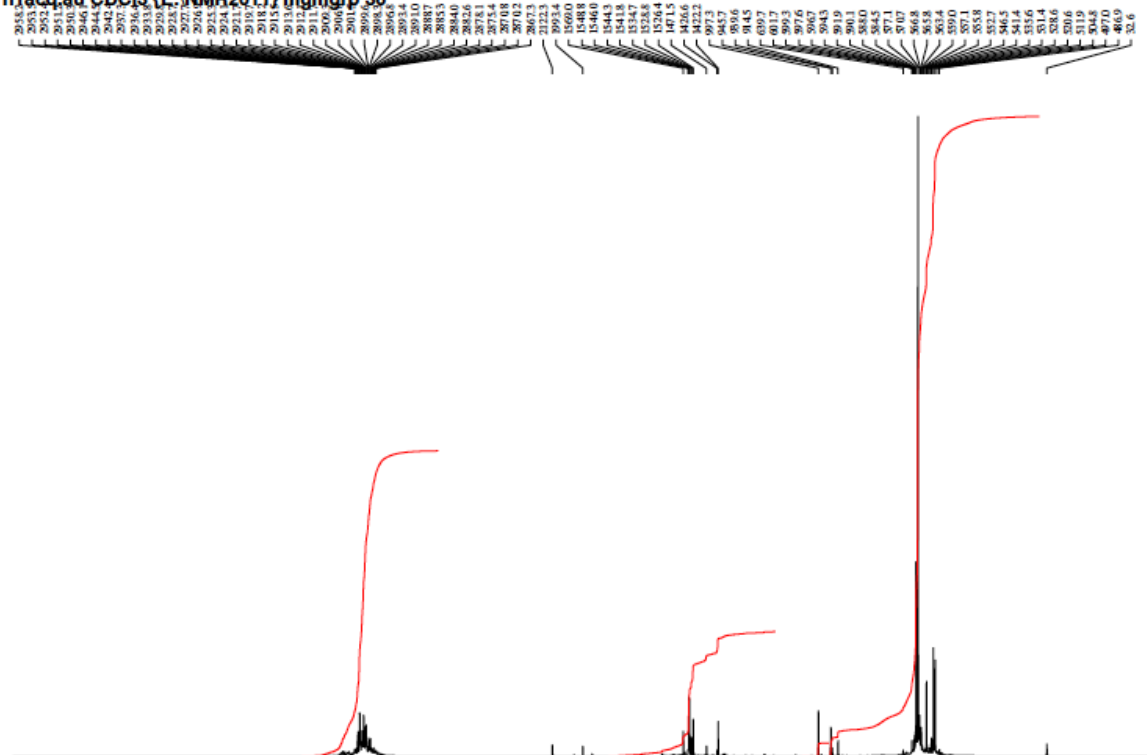

NAME Feb09-2011-36  
EXPNO 1  
PROCNO 1  
Date\_ 20110210  
Time 10.23  
INSTRUM av400  
PROBHD 5 mm QNP 1H/13  
PULPROG zg60  
TD 65536  
SOLVENT CDC13  
NS 16  
DS 2  
SWH 8278.146 Hz  
FIDRES 0.126314 Hz  
AQ 3.9584243 sec  
RG 90.5  
DW 60.400 usec  
DE 7.50 usec  
TE 300.0 K  
D1 1.00000000 sec  
----- CHANNEL f1 -----  
NUC1 1H  
P1 9.00 usec  
PL1 0.00 dB  
SF01 400.2024714 MHz  
SI 32768  
SF 400.2000028 MHz  
WDW EM  
SSB 0  
LB 0.30 Hz  
GB 0  
PC 1.00

10 9 8 7 6 5 4 3 2 1 0 ppm  
28.18 11.51 1.22 59.08

13d

Instrument DQX400  
Chemist BH  
Group MGM  
BH4158  
c13acq.au CDC13 (E:\NMR2011) mgmgrp 36

NMR@CHEM.OX

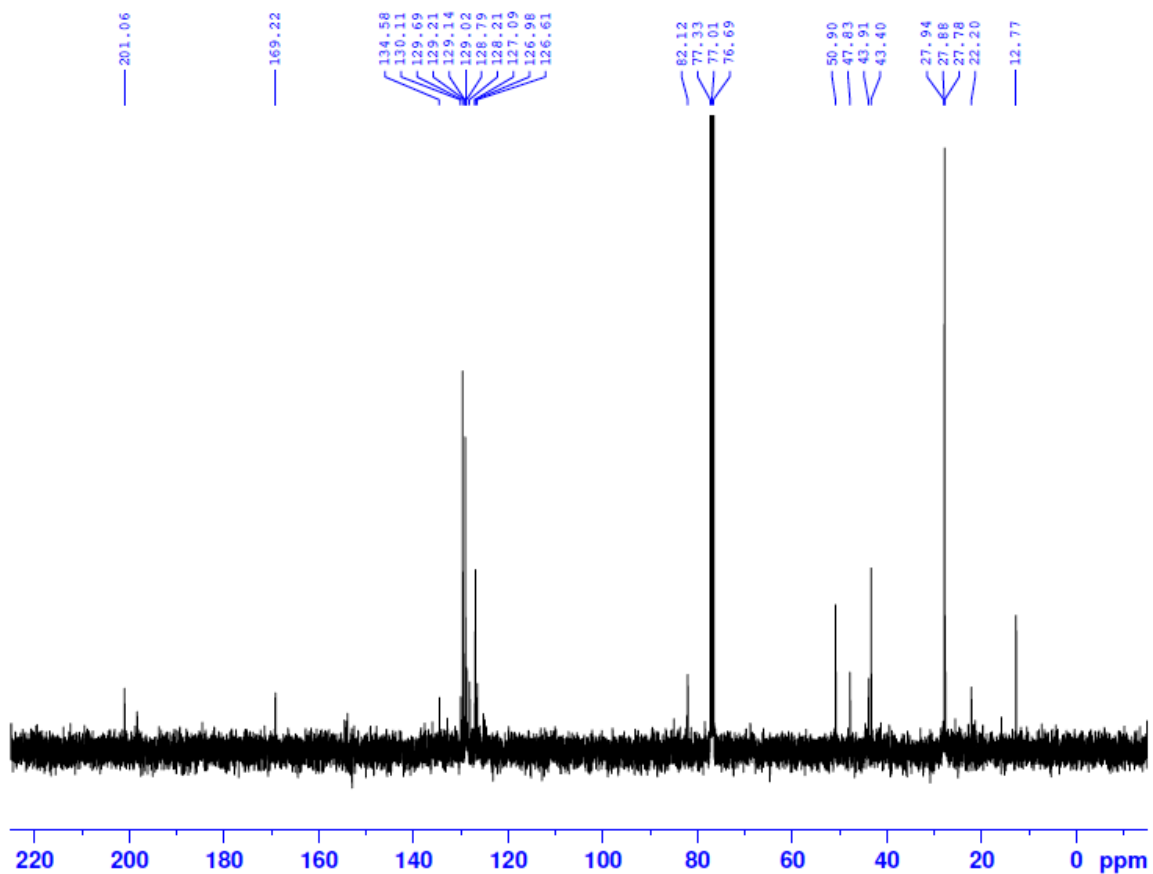

```
NAME Feb09-2011-36
EXPNO 2
PROCNO 1
Date_ 20110210
Time 10.31
INSTRUM av400
PROBHD 5 mm QNP 1H/13
PULPROG zgpg30
TD 32768
SOLVENT CDC13
NS 256
DS 4
SWH 26178.010 Hz
FIDRES 0.798889 Hz
AQ 0.6259188 sec
RG 32768
DW 19.100 usec
DE 7.50 usec
TE 300.0 K
D1 1.00000000 sec
D11 0.03000000 sec
TD0 1

----- CHANNEL f1 -----
NUC1 13C
P1 9.50 usec
PL1 0.00 dB
SFO1 100.6403931 MHz

----- CHANNEL f2 -----
CPDPRG2 waltz16
NUC2 1H
PCPD2 80.00 usec
PL2 0.00 dB
PL12 19.00 dB
PL13 25.00 dB
SFO2 400.2016008 MHz
SI 32768
SF 100.6303718 MHz
WDW EM
SSB 0
LB 1.00 Hz
GB 0
PC 1.40
```

14a

Instrument DQX400  
 Chemist BH  
 Group MGM  
 BH3160  
 h1acq.au CDC13 {C:NMR} mgmgrp 18

NMROCHEM.OX

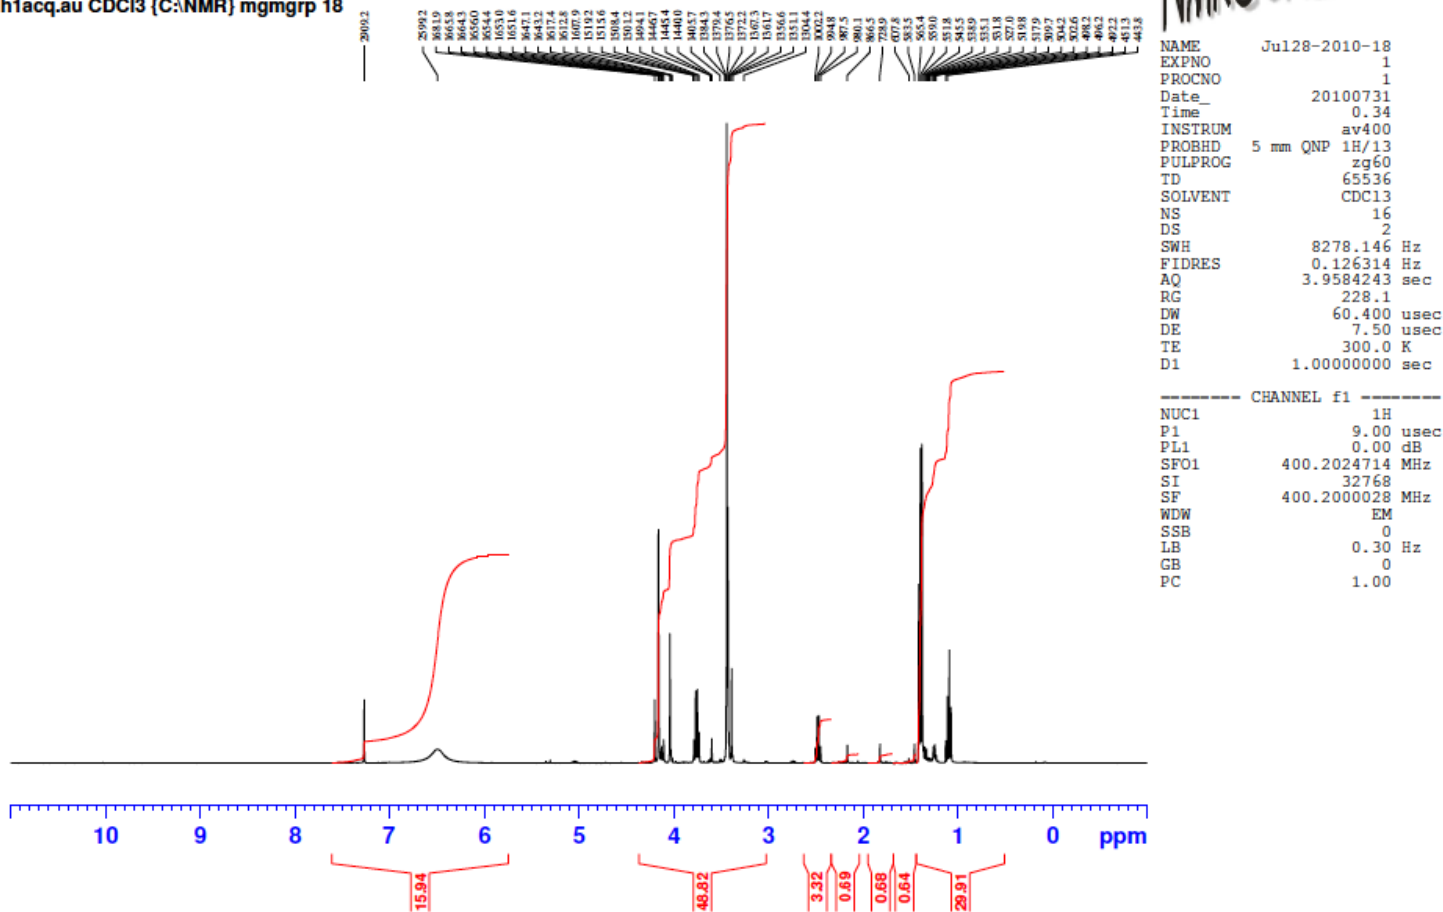

14a

Instrument DQX400  
Chemist BH  
Group MGM  
BH3160  
c13acq.au CDC13 (C:NMR) mgmgrp 18

NMR@CHEM.OX

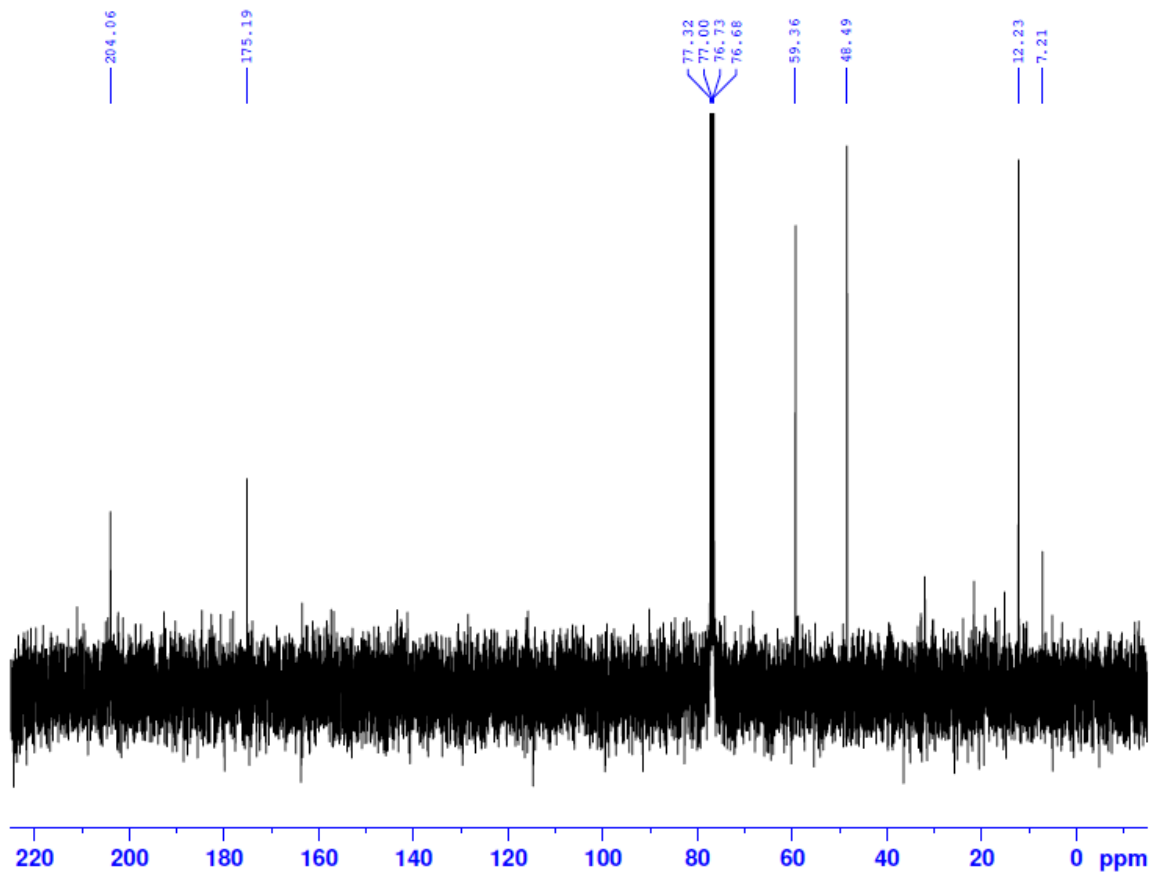

NAME Jul28-2010-18  
EXPNO 2  
PROCNO 1  
Date\_ 20100731  
Time 0.41  
INSTRUM av400  
PROBHD 5 mm QNP 1H/13  
PULPROG zgpg30  
TD 32768  
SOLVENT CDC13  
NS 256  
DS 4  
SWH 26178.010 Hz  
FIDRES 0.798889 Hz  
AQ 0.6259188 sec  
RG 32768  
DW 19.100 usec  
DE 7.50 usec  
TE 300.0 K  
D1 1.00000000 sec  
D11 0.03000000 sec  
TD0 1

----- CHANNEL f1 -----  
NUC1 13C  
P1 9.50 usec  
PL1 0.00 dB  
SFO1 100.6403931 MHz

----- CHANNEL f2 -----  
CPDPRG2 waltz16  
NUC2 1H  
PCPD2 80.00 usec  
PL2 0.00 dB  
PL12 19.00 dB  
PL13 25.00 dB  
SFO2 400.2016008 MHz  
SI 32768  
SF 100.6303718 MHz  
WDW EM  
SSB 0  
LB 1.00 Hz  
GB 0  
PC 1.40

14b

Instrument DQX400  
 Chemist BH  
 Group MGM  
 BH4144

h1acq.au CDC13 (C-NMR) mgmgrp 50

NMRCHEM.OX

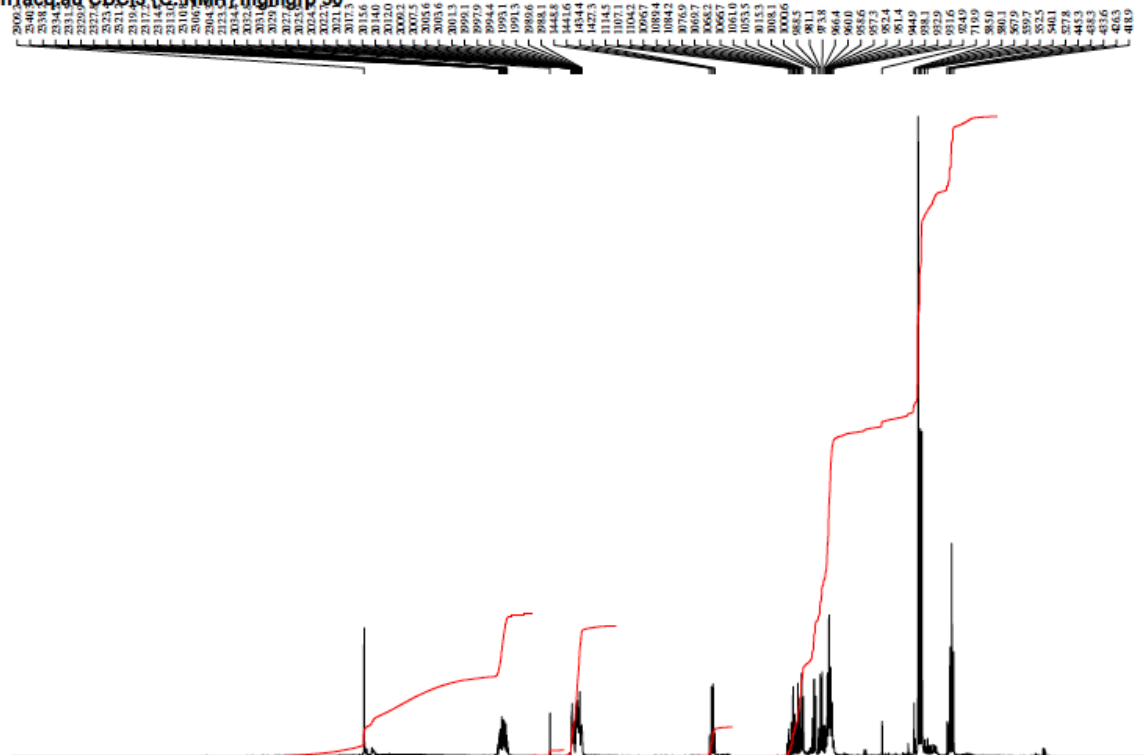

NAME Feb02-2011-50  
 EXPNO 1  
 PROCNO 1  
 Date\_ 20110202  
 Time 22.47  
 INSTRUM av400  
 PROBHD 5 mm QNP 1H/13  
 PULPROG zg60  
 TD 65536  
 SOLVENT CDC13  
 NS 16  
 DS 2  
 SWH 8278.146 Hz  
 FIDRES 0.126314 Hz  
 AQ 3.9584243 sec  
 RG 228.1  
 DW 60.400 usec  
 DE 7.50 usec  
 TE 300.0 K  
 D1 1.00000000 sec

----- CHANNEL f1 -----  
 NUC1 1H  
 P1 9.00 usec  
 PL1 0.00 dB  
 SFO1 400.2024714 MHz  
 SI 32768  
 SF 400.2000028 MHz  
 WDW EM  
 SSB 0  
 LB 0.30 Hz  
 GB 0  
 PC 1.00

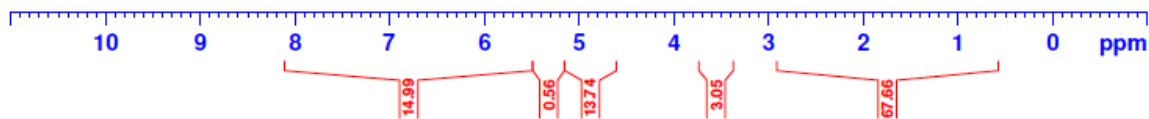

14b

Instrument DQX400  
Chemist BH  
Group MGM  
BH4144  
c13acq.au CDC13 (C:NMR) mgmgrp 50

NMR@CHEM.OX

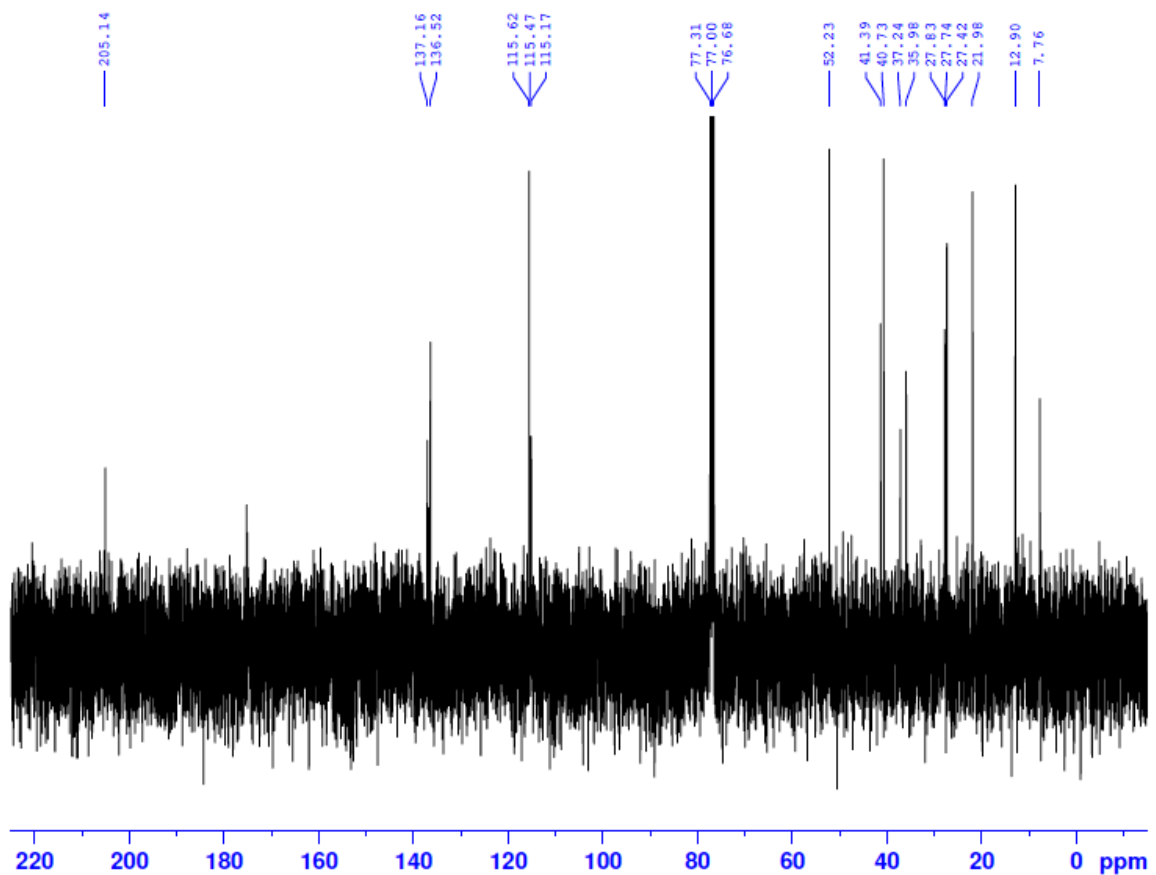

```
NAME      Feb02-2011-50
EXPNO     2
PROCNO    1
Date_     20110202
Time      22.55
INSTRUM   av400
PROBHD    5 mm QNP 1H/13
PULPROG   zgpg30
TD        32768
SOLVENT   CDC13
NS        256
DS        4
SWH       26178.010 Hz
FIDRES    0.798889 Hz
AQ        0.6259188 sec
RG        32768
DW        19.100 usec
DE        7.50 usec
TE        300.0 K
D1        1.00000000 sec
D11       0.03000000 sec
TD0       1

----- CHANNEL f1 -----
NUC1      13C
P1        9.50 usec
PL1       0.00 dB
SFO1     100.6403931 MHz

----- CHANNEL f2 -----
CPDPRG2   waltz16
NUC2      1H
PCPD2     80.00 usec
PL2       0.00 dB
PL12     19.00 dB
PL13     25.00 dB
SFO2     400.2016008 MHz
SI        32768
SF       100.6303718 MHz
WDW       EM
SSB       0
LB        1.00 Hz
GB        0
PC        1.40
```

14c

Instrument DQX400  
Chemist BH  
Group MGM  
BH4156

hjacq.au CDC13 (F: NMR2011) mgmgrp 19

NMROCHEM.OX

2095  
2091  
2089  
2085  
2083  
2080  
2079  
2075  
2073  
2070  
2065  
2060  
2055  
2050  
2045  
2040  
2035  
2030  
2025  
2020  
2015  
2010  
2005  
2000  
1995  
1990  
1985  
1980  
1975  
1970  
1965  
1960  
1955  
1950  
1945  
1940  
1935  
1930  
1925  
1920  
1915  
1910  
1905  
1900  
1895  
1890  
1885  
1880  
1875  
1870  
1865  
1860  
1855  
1850  
1845  
1840  
1835  
1830  
1825  
1820  
1815  
1810  
1805  
1800  
1795  
1790  
1785  
1780  
1775  
1770  
1765  
1760  
1755  
1750  
1745  
1740  
1735  
1730  
1725  
1720  
1715  
1710  
1705  
1700  
1695  
1690  
1685  
1680  
1675  
1670  
1665  
1660  
1655  
1650  
1645  
1640  
1635  
1630  
1625  
1620  
1615  
1610  
1605  
1600  
1595  
1590  
1585  
1580  
1575  
1570  
1565  
1560  
1555  
1550  
1545  
1540  
1535  
1530  
1525  
1520  
1515  
1510  
1505  
1500  
1495  
1490  
1485  
1480  
1475  
1470  
1465  
1460  
1455  
1450  
1445  
1440  
1435  
1430  
1425  
1420  
1415  
1410  
1405  
1400  
1395  
1390  
1385  
1380  
1375  
1370  
1365  
1360  
1355  
1350  
1345  
1340  
1335  
1330  
1325  
1320  
1315  
1310  
1305  
1300  
1295  
1290  
1285  
1280  
1275  
1270  
1265  
1260  
1255  
1250  
1245  
1240  
1235  
1230  
1225  
1220  
1215  
1210  
1205  
1200  
1195  
1190  
1185  
1180  
1175  
1170  
1165  
1160  
1155  
1150  
1145  
1140  
1135  
1130  
1125  
1120  
1115  
1110  
1105  
1100  
1095  
1090  
1085  
1080  
1075  
1070  
1065  
1060  
1055  
1050  
1045  
1040  
1035  
1030  
1025  
1020  
1015  
1010  
1005  
1000  
995  
990  
985  
980  
975  
970  
965  
960  
955  
950  
945  
940  
935  
930  
925  
920  
915  
910  
905  
900  
895  
890  
885  
880  
875  
870  
865  
860  
855  
850  
845  
840  
835  
830  
825  
820  
815  
810  
805  
800  
795  
790  
785  
780  
775  
770  
765  
760  
755  
750  
745  
740  
735  
730  
725  
720  
715  
710  
705  
700  
695  
690  
685  
680  
675  
670  
665  
660  
655  
650  
645  
640  
635  
630  
625  
620  
615  
610  
605  
600  
595  
590  
585  
580  
575  
570  
565  
560  
555  
550  
545  
540  
535  
530  
525  
520  
515  
510  
505  
500  
495  
490  
485  
480  
475  
470  
465  
460  
455  
450  
445  
440  
435  
430  
425  
420  
415  
410  
405  
400  
395  
390  
385  
380  
375  
370  
365  
360  
355  
350  
345  
340  
335  
330  
325  
320  
315  
310  
305  
300  
295  
290  
285  
280  
275  
270  
265  
260  
255  
250  
245  
240  
235  
230  
225  
220  
215  
210  
205  
200  
195  
190  
185  
180  
175  
170  
165  
160  
155  
150  
145  
140  
135  
130  
125  
120  
115  
110  
105  
100  
95  
90  
85  
80  
75  
70  
65  
60  
55  
50  
45  
40  
35  
30  
25  
20  
15  
10  
5  
0

NAME Feb09-2011-19  
EXPNO 1  
PROCNO 1  
Date\_ 20110210  
Time 3.34  
INSTRUM av400  
PROBHD 5 mm QNP 1H/13  
PULPROG zg60  
TD 65536  
SOLVENT CDC13  
NS 16  
DS 2  
SWH 8278.146 Hz  
FIDRES 0.126314 Hz  
AQ 3.9584243 sec  
RG 128  
DW 60.400 usec  
DE 7.50 usec  
TE 300.0 K  
D1 1.00000000 sec

----- CHANNEL f1 -----  
NUC1 1H  
P1 9.00 usec  
PL1 0.00 dB  
SFO1 400.2024714 MHz  
SI 32768  
SF 400.2000028 MHz  
WDW EM  
SSB 0  
LB 0.30 Hz  
GB 0  
PC 1.00

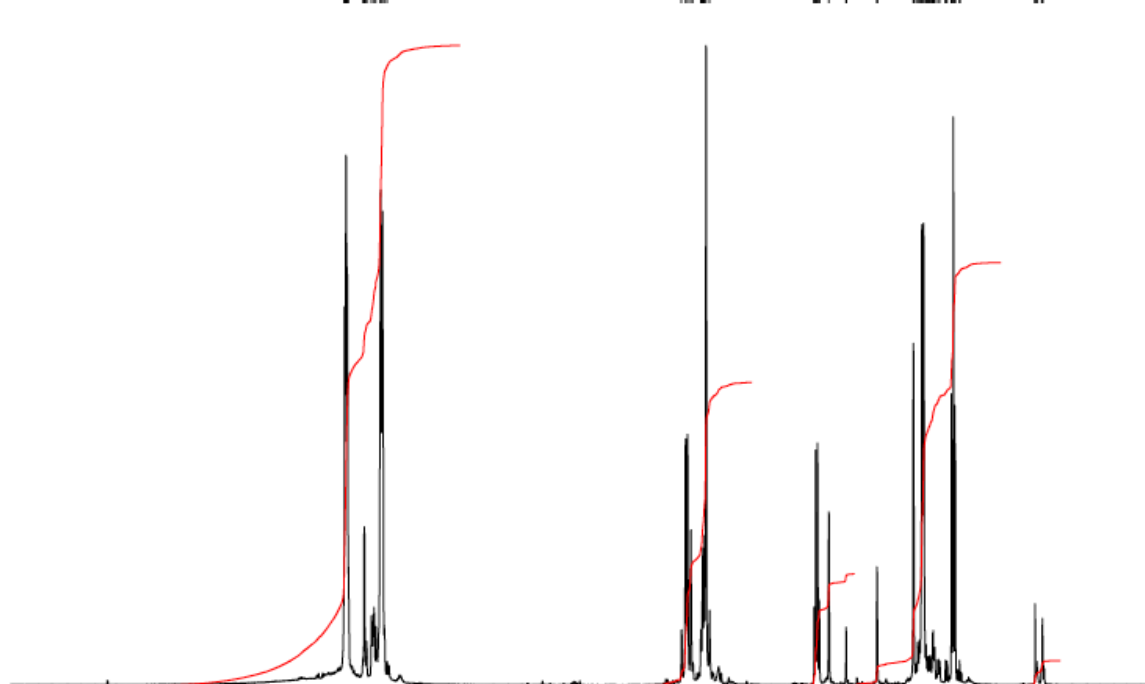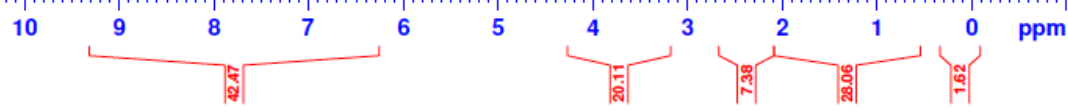

14c

Instrument DQX400  
Chemist BH  
Group MGM  
BH4156  
c13acq.au CDC13 (E:\NMR2011) mgmgrp 19

NMR@CHEM.OX

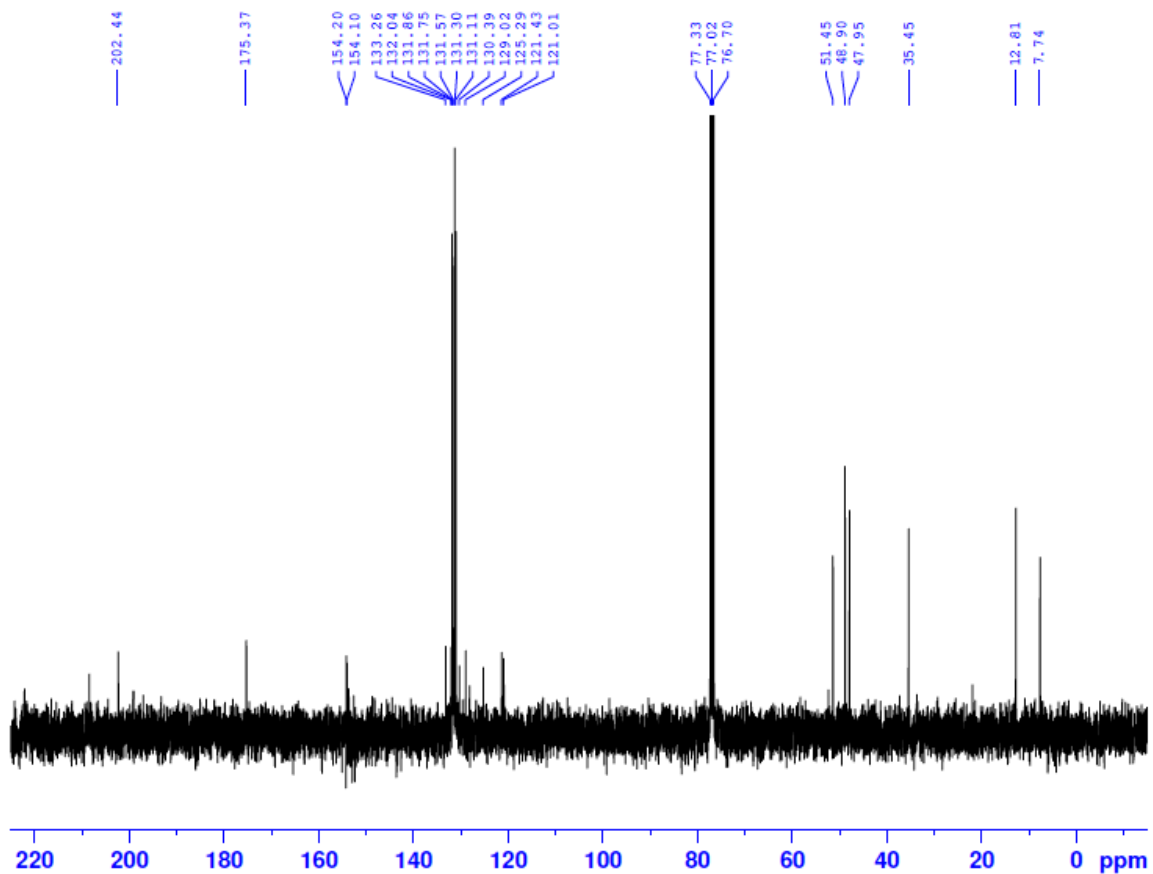

NAME Feb09-2011-19  
EXPNO 2  
PROCNO 1  
Date\_ 20110210  
Time 3.42  
INSTRUM av400  
PROBHD 5 mm QNP 1H/13  
PULPROG zgpg30  
TD 32768  
SOLVENT CDC13  
NS 256  
DS 4  
SWH 26178.010 Hz  
FIDRES 0.798889 Hz  
AQ 0.6259188 sec  
RG 32768  
DW 19.100 usec  
DE 7.50 usec  
TE 300.0 K  
D1 1.00000000 sec  
D11 0.03000000 sec  
TD0 1

----- CHANNEL f1 -----  
NUC1 13C  
P1 9.50 usec  
PL1 0.00 dB  
SFO1 100.6403931 MHz

----- CHANNEL f2 -----  
CPDPRG2 waltz16  
NUC2 1H  
PCPD2 80.00 usec  
PL2 0.00 dB  
PL12 19.00 dB  
PL13 25.00 dB  
SFO2 400.2016008 MHz  
SI 32768  
SF 100.6303718 MHz  
WDW EM  
SSB 0  
LB 1.00 Hz  
GB 0  
PC 1.40



14d

Instrument DQX400  
Chemist BH  
Group MGM  
BH4180

hjacq.au CDC13 (F1-NMR2011) mgmgrp 5

NMRCHEM.OX

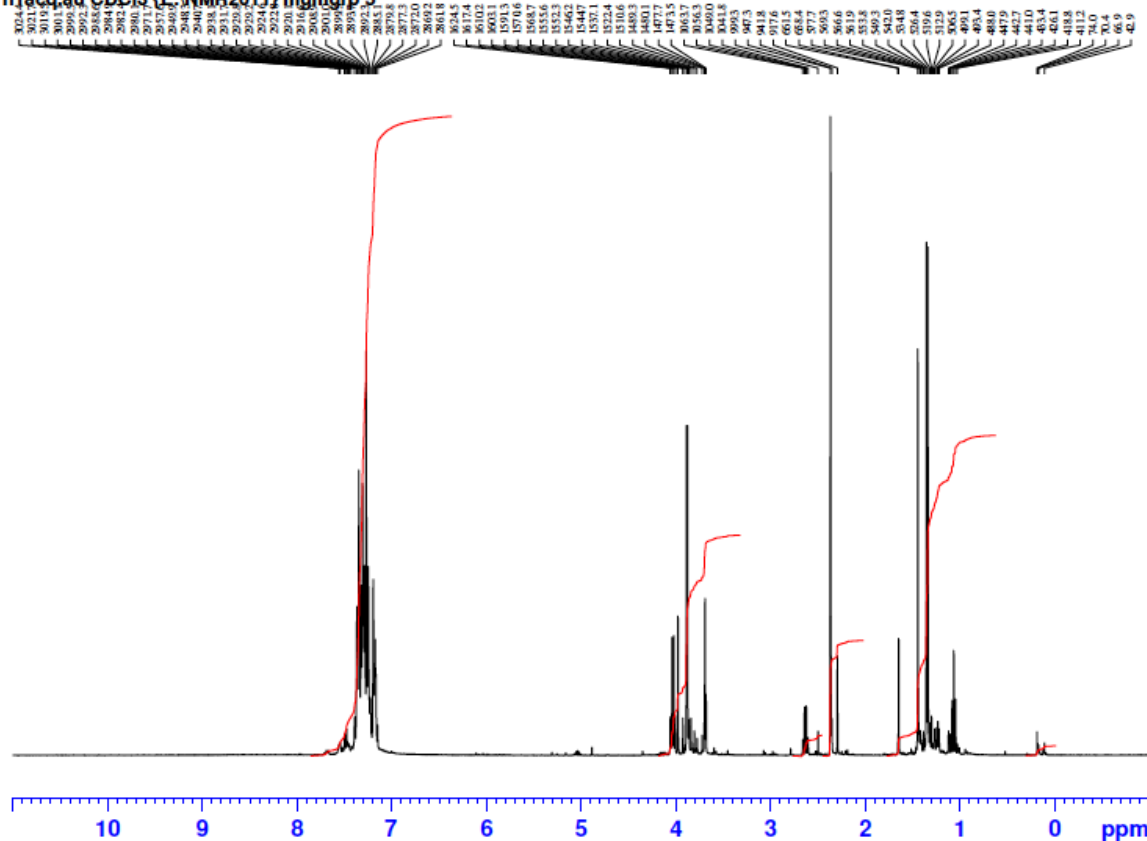

NAME Mar08-2011-5  
EXPNO 1  
PROCNO 1  
Date\_ 20110308  
Time 10.16  
INSTRUM av400  
PROBHD 5 mm QNP 1H/13  
PULPROG zg60  
TD 65536  
SOLVENT CDC13  
NS 16  
DS 2  
SWH 8278.146 Hz  
FIDRES 0.126314 Hz  
AQ 3.9584243 sec  
RG 228.1  
DW 60.400 usec  
DE 7.50 usec  
TE 300.0 K  
D1 1.00000000 sec

----- CHANNEL f1 -----  
NUC1 1H  
P1 9.00 usec  
PL1 0.00 dB  
SFO1 400.2024714 MHz  
SI 32768  
SF 400.2000028 MHz  
WDW EM  
SSB 0  
LB 0.30 Hz  
GB 0  
PC 1.00

48.22  
16.64  
1.54  
8.70  
24.16  
0.73

14d

Instrument DQX400  
Chemist BH  
Group MGM  
BH4180  
c13acq.au CDC13 (E:\NMR2011) mgmgrp 5

NMR@CHEM.OX

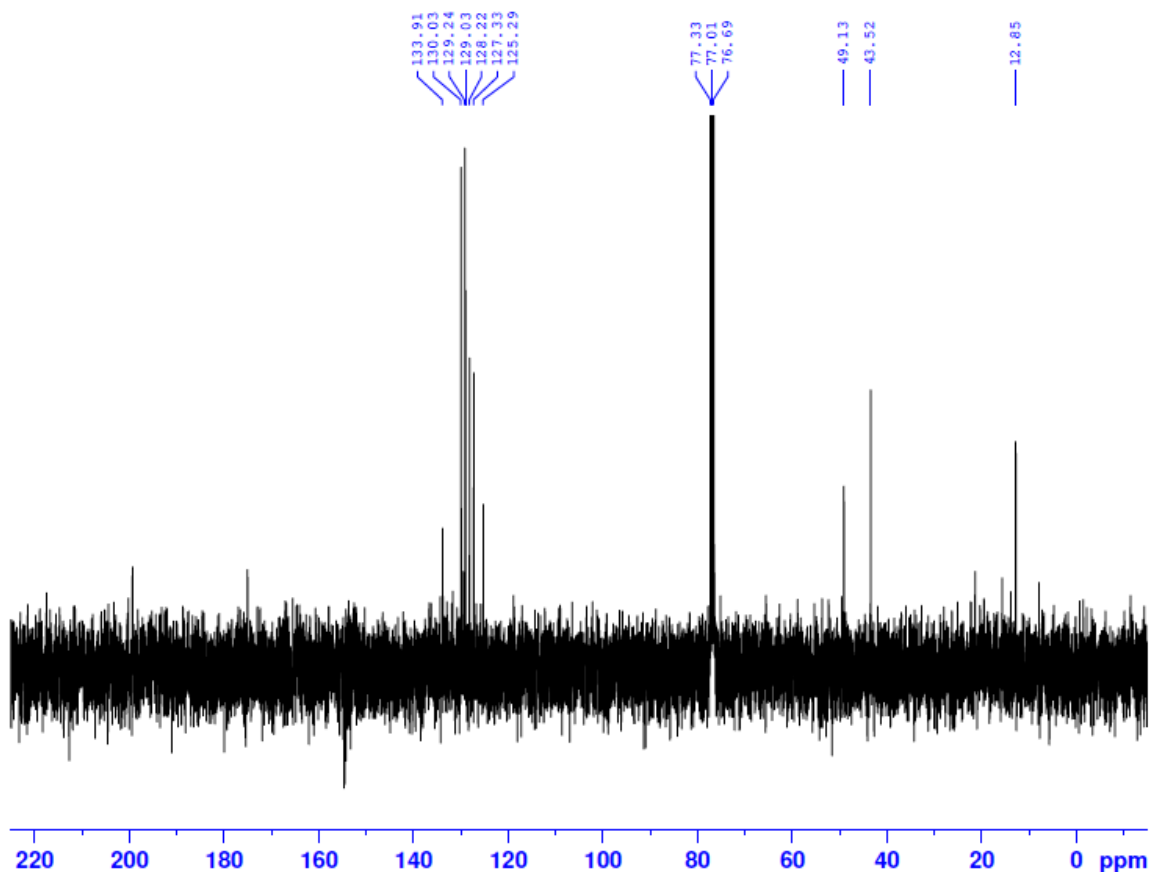

```
NAME      Mar08-2011-5
EXPNO     2
PROCNO    1
Date_     20110308
Time      10.24
INSTRUM   av400
PROBHD    5 mm QNP 1H/13
PULPROG   zgpg30
TD         32768
SOLVENT   CDC13
NS         256
DS         4
SWH       26178.010 Hz
FIDRES    0.798889 Hz
AQ         0.6259188 sec
RG         32768
DW         19.100 usec
DE         7.50 usec
TE         300.0 K
D1         1.00000000 sec
D11        0.03000000 sec
TD0        1

----- CHANNEL f1 -----
NUC1       13C
P1         9.50 usec
PL1        0.00 dB
SFO1       100.6403931 MHz

----- CHANNEL f2 -----
CPDPRG2   waltz16
NUC2       1H
PCPD2     80.00 usec
PL2        0.00 dB
PL12       19.00 dB
PL13       25.00 dB
SFO2       400.2016008 MHz
SI         32768
SF         100.6303718 MHz
WDW        EM
SSB        0
LB         1.00 Hz
GB         0
PC         1.40
```

15b'

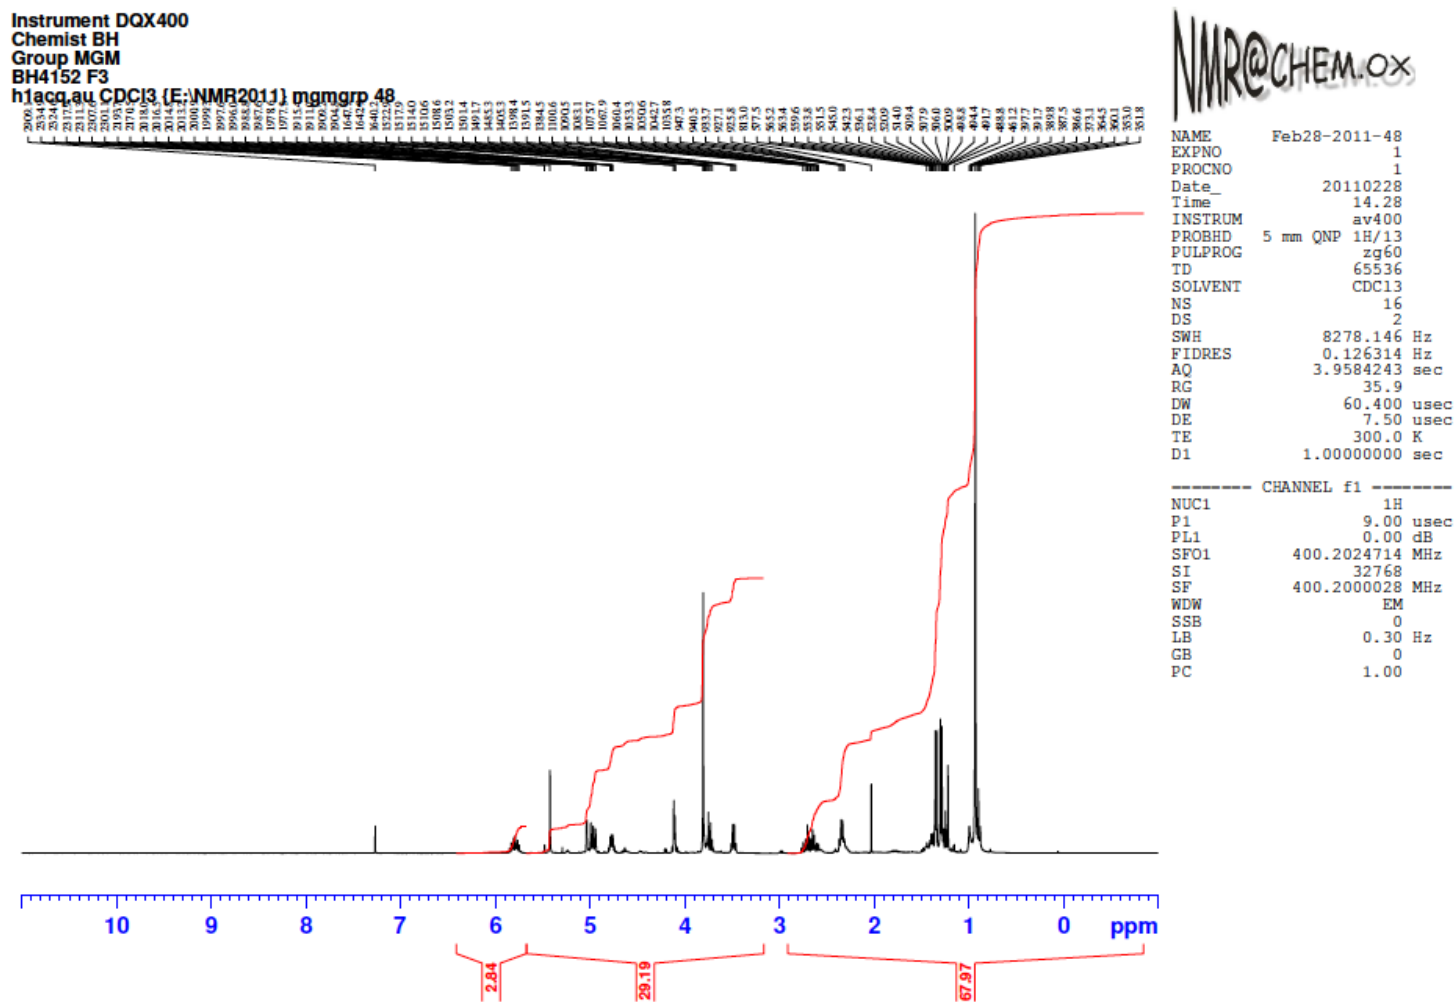

15b'

Instrument DQX400  
 Chemist BH  
 Group MGM  
 BH4152 F3  
 c13acq.au CDC13 (E:\NMR2011) mgmgrp 48

NMR@CHEM.OX

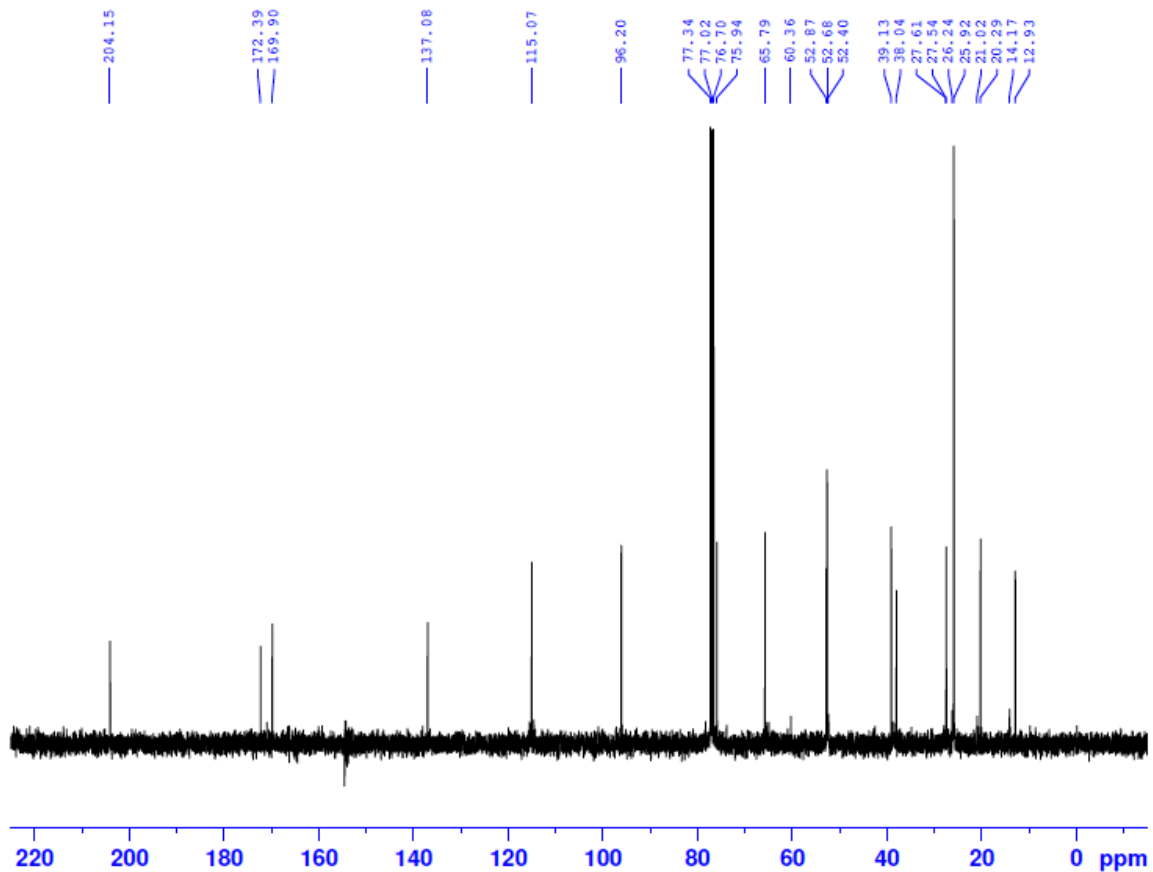

```

NAME      Feb28-2011-48
EXPNO     2
PROCNO    1
Date_     20110228
Time      14.36
INSTRUM   av400
PROBHD    5 mm QNP 1H/13
PULPROG   zgpg30
TD         32768
SOLVENT   CDC13
NS         256
DS         4
SWH        26178.010 Hz
FIDRES     0.798889 Hz
AQ         0.6259188 sec
RG         32768
DW         19.100 usec
DE         7.50 usec
TE         300.0 K
D1         1.00000000 sec
D11        0.03000000 sec
TD0        1
  
```

```

----- CHANNEL f1 -----
NUC1      13C
P1        9.50 usec
PL1       0.00 dB
SFO1     100.6403931 MHz
  
```

```

----- CHANNEL f2 -----
CPDPRG2   waltz16
NUC2      1H
PCPD2     80.00 usec
PL2       0.00 dB
PL12     19.00 dB
PL13     25.00 dB
SFO2     400.2016008 MHz
SI        32768
SF       100.6303718 MHz
WDW       EM
SSB       0
LB        1.00 Hz
GB        0
PC        1.40
  
```

15b

Instrument AVC500  
Group MGM  
3432 Beth Heavside 31/3/11

NMRO@CHEM.OX

NAME bh34323103  
EXPNO 1  
PROCNO 1  
Date\_ 20110403  
Time\_ 21.27  
INSTRUM avc500  
PROBHD 5 mm CPDUL 13C  
PULPROG zg30  
TD 65536  
SOLVENT CDCl3  
NS 16  
DS 2  
SWH 10330.578 Hz  
FIDRES 0.157632 Hz  
AQ 3.1719923 sec  
RG 4  
DW 48.400 usec  
DE 6.00 usec  
TE 298.0 K  
D1 1.00000000 sec  
TD0 1

----- CHANNEL f1 -----  
NUC1 1H  
P1 9.60 usec  
PL1 -6.00 dB  
PL1W 15.19999981 W  
SFO1 500.3030896 MHz  
SI 32768  
SF 500.3000240 MHz  
WDW EM  
SSB 0  
LB 0.30 Hz  
GB 0  
PC 1.00

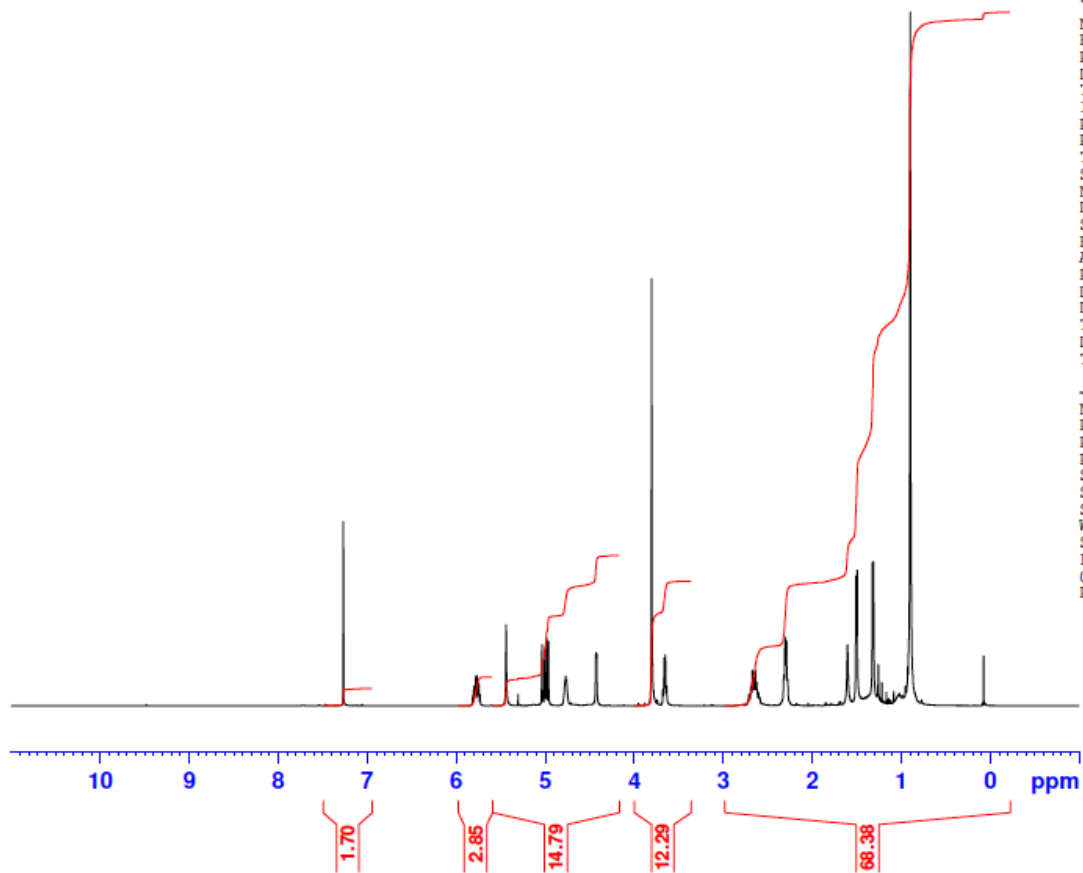

15b

Instrument AVC500  
Group MGM  
3432 Beth Heaviside 31/3/11

NMR@CHEM.OX

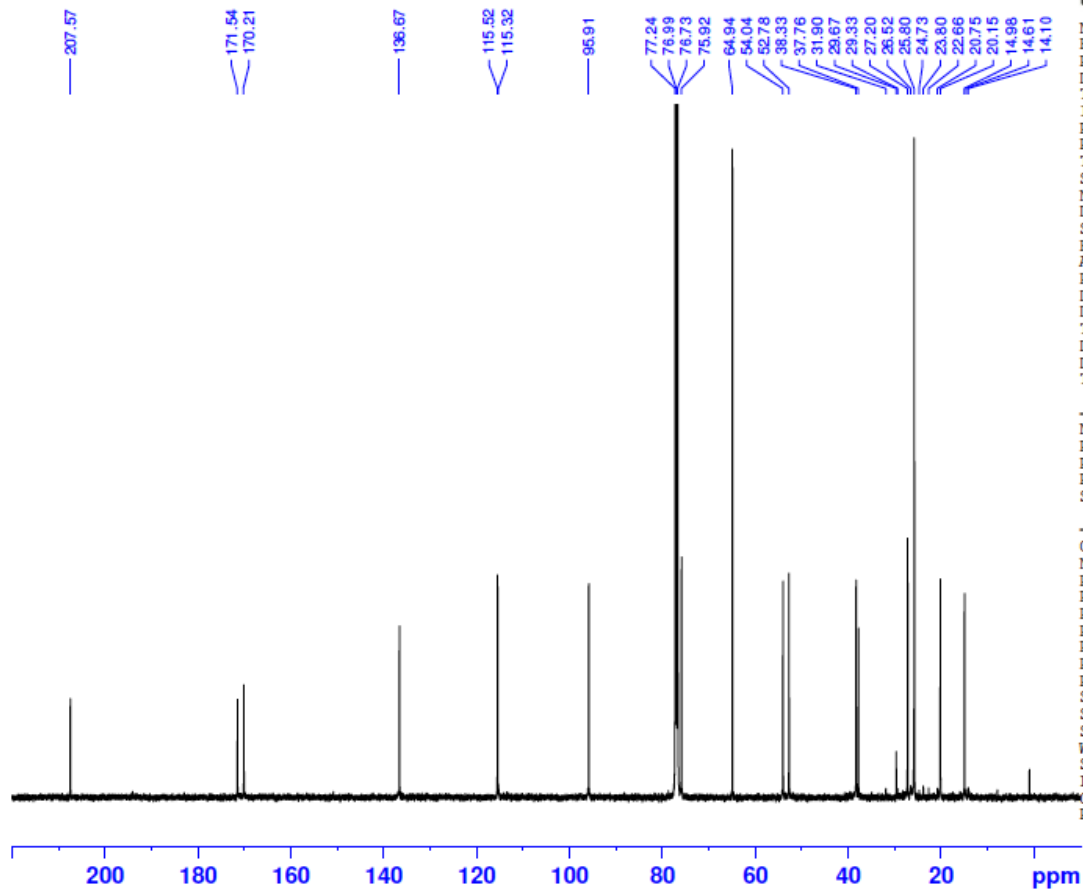

```
NAME          bh34323103
EXPNO         3
PROCNO        1
Date_         20110403
Time_         23.21
INSTRUM       avc500
PROBHD        5 mm CPDUL 13C
PULPROG       zgpg30
TD            65536
SOLVENT       CDC13
NS            1024
DS            2
SWH           31250.000 Hz
FIDRES        0.476837 Hz
AQ            1.0486259 sec
RG            1820
DW            16.000 usec
DE            20.00 usec
TE            298.0 K
D1            2.00000000 sec
D11           0.03000000 sec
TD0           1

----- CHANNEL f1 -----
NUC1          13C
P1            9.50 usec
PL1           -4.40 dB
PL1W          28.15752029 W
SFO1          125.8131151 MHz

----- CHANNEL f2 -----
CPDPRG2       waltz16
NUC2          1H
PCPD2         80.00 usec
PL2           -6.00 dB
PL12          12.42 dB
PL13          18.42 dB
PL2W          15.19999981 W
PL12W         0.21869738 W
PL13W         0.05493430 W
SFO2          500.3020012 MHz
SI            32768
SF            125.8005438 MHz
WDW           EM
SSB           0
LB            1.00 Hz
GB            0
PC            1.40
```

15c'

Instrument DQX400  
Chemist BH  
Group MGM  
BH4160 F3  
h1acq.au CDC13 {E:\NMR2011\mgmgrp 54

NMROCHEM.OX

288.5  
288.1  
287.7  
287.3  
266.5  
200.0  
284.4  
283.7  
282.7  
282.4  
214.4  
214.2  
214.0  
213.8  
213.6  
213.4  
213.2  
213.0  
212.8  
212.6  
212.4  
212.2  
212.0  
211.8  
211.6  
211.4  
211.2  
211.0  
210.8  
210.6  
210.4  
210.2  
210.0  
209.8  
209.6  
209.4  
209.2  
209.0  
208.8  
208.6  
208.4  
208.2  
208.0  
207.8  
207.6  
207.4  
207.2  
207.0  
206.8  
206.6  
206.4  
206.2  
206.0  
205.8  
205.6  
205.4  
205.2  
205.0  
204.8  
204.6  
204.4  
204.2  
204.0  
203.8  
203.6  
203.4  
203.2  
203.0  
202.8  
202.6  
202.4  
202.2  
202.0  
201.8  
201.6  
201.4  
201.2  
201.0  
200.8  
200.6  
200.4  
200.2  
200.0  
199.8  
199.6  
199.4  
199.2  
199.0  
198.8  
198.6  
198.4  
198.2  
198.0  
197.8  
197.6  
197.4  
197.2  
197.0  
196.8  
196.6  
196.4  
196.2  
196.0  
195.8  
195.6  
195.4  
195.2  
195.0  
194.8  
194.6  
194.4  
194.2  
194.0  
193.8  
193.6  
193.4  
193.2  
193.0  
192.8  
192.6  
192.4  
192.2  
192.0  
191.8  
191.6  
191.4  
191.2  
191.0  
190.8  
190.6  
190.4  
190.2  
190.0  
189.8  
189.6  
189.4  
189.2  
189.0  
188.8  
188.6  
188.4  
188.2  
188.0  
187.8  
187.6  
187.4  
187.2  
187.0  
186.8  
186.6  
186.4  
186.2  
186.0  
185.8  
185.6  
185.4  
185.2  
185.0  
184.8  
184.6  
184.4  
184.2  
184.0  
183.8  
183.6  
183.4  
183.2  
183.0  
182.8  
182.6  
182.4  
182.2  
182.0  
181.8  
181.6  
181.4  
181.2  
181.0  
180.8  
180.6  
180.4  
180.2  
180.0  
179.8  
179.6  
179.4  
179.2  
179.0  
178.8  
178.6  
178.4  
178.2  
178.0  
177.8  
177.6  
177.4  
177.2  
177.0  
176.8  
176.6  
176.4  
176.2  
176.0  
175.8  
175.6  
175.4  
175.2  
175.0  
174.8  
174.6  
174.4  
174.2  
174.0  
173.8  
173.6  
173.4  
173.2  
173.0  
172.8  
172.6  
172.4  
172.2  
172.0  
171.8  
171.6  
171.4  
171.2  
171.0  
170.8  
170.6  
170.4  
170.2  
170.0  
169.8  
169.6  
169.4  
169.2  
169.0  
168.8  
168.6  
168.4  
168.2  
168.0  
167.8  
167.6  
167.4  
167.2  
167.0  
166.8  
166.6  
166.4  
166.2  
166.0  
165.8  
165.6  
165.4  
165.2  
165.0  
164.8  
164.6  
164.4  
164.2  
164.0  
163.8  
163.6  
163.4  
163.2  
163.0  
162.8  
162.6  
162.4  
162.2  
162.0  
161.8  
161.6  
161.4  
161.2  
161.0  
160.8  
160.6  
160.4  
160.2  
160.0  
159.8  
159.6  
159.4  
159.2  
159.0  
158.8  
158.6  
158.4  
158.2  
158.0  
157.8  
157.6  
157.4  
157.2  
157.0  
156.8  
156.6  
156.4  
156.2  
156.0  
155.8  
155.6  
155.4  
155.2  
155.0  
154.8  
154.6  
154.4  
154.2  
154.0  
153.8  
153.6  
153.4  
153.2  
153.0  
152.8  
152.6  
152.4  
152.2  
152.0  
151.8  
151.6  
151.4  
151.2  
151.0  
150.8  
150.6  
150.4  
150.2  
150.0  
149.8  
149.6  
149.4  
149.2  
149.0  
148.8  
148.6  
148.4  
148.2  
148.0  
147.8  
147.6  
147.4  
147.2  
147.0  
146.8  
146.6  
146.4  
146.2  
146.0  
145.8  
145.6  
145.4  
145.2  
145.0  
144.8  
144.6  
144.4  
144.2  
144.0  
143.8  
143.6  
143.4  
143.2  
143.0  
142.8  
142.6  
142.4  
142.2  
142.0  
141.8  
141.6  
141.4  
141.2  
141.0  
140.8  
140.6  
140.4  
140.2  
140.0

|         |                |
|---------|----------------|
| NAME    | Feb17-2011-54  |
| EXPNO   | 1              |
| PROCNO  | 1              |
| Date_   | 20110218       |
| Time    | 7.59           |
| INSTRUM | av400          |
| PROBHD  | 5 mm QNP 1H/13 |
| PULPROG | zg60           |
| TD      | 65536          |
| SOLVENT | CDC13          |
| NS      | 16             |
| DS      | 2              |
| SWH     | 8278.146 Hz    |
| FIDRES  | 0.126314 Hz    |
| AQ      | 3.9584243 sec  |
| RG      | 35.9           |
| DW      | 60.400 usec    |
| DE      | 7.50 usec      |
| TE      | 300.0 K        |
| D1      | 1.00000000 sec |

----- CHANNEL f1 -----

|      |                 |
|------|-----------------|
| NUC1 | 1H              |
| P1   | 9.00 usec       |
| PL1  | 0.00 dB         |
| SFO1 | 400.2024714 MHz |
| SI   | 32768           |
| SF   | 400.2000028 MHz |
| WDW  | EM              |
| SSB  | 0               |
| LB   | 0.30 Hz         |
| GB   | 0               |
| PC   | 1.00            |

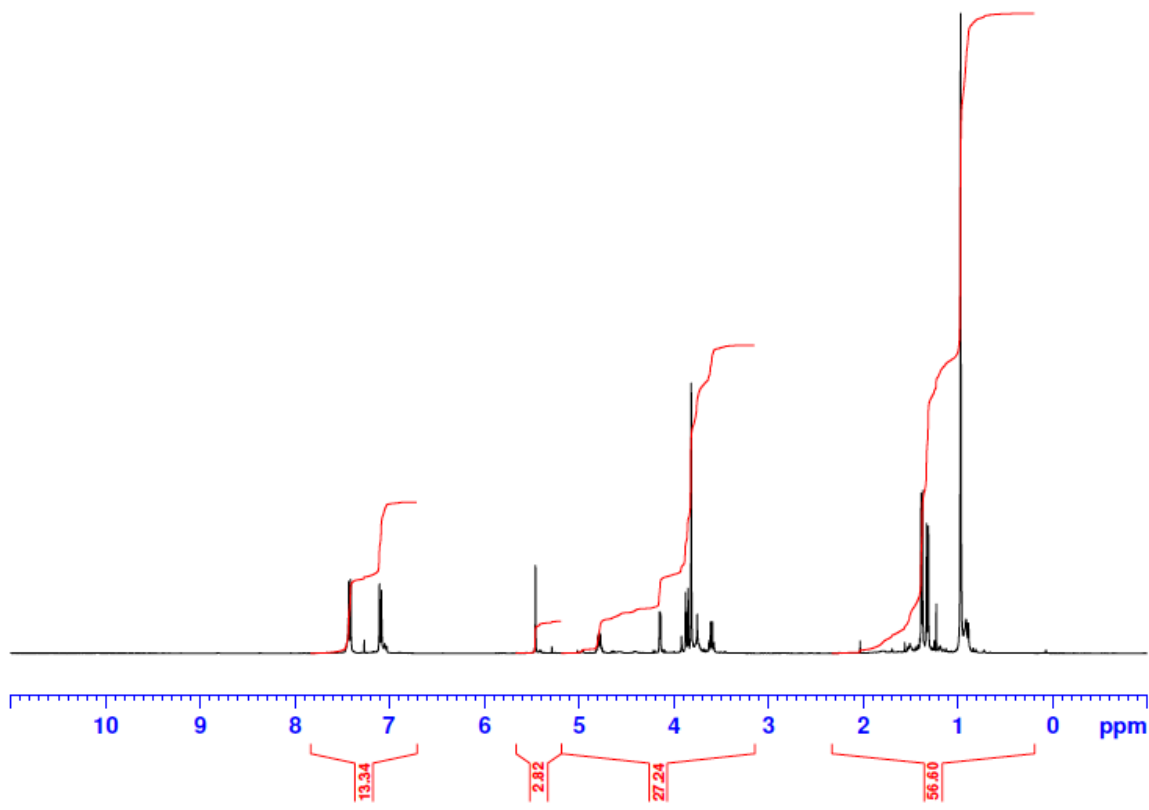

15c'

Instrument DQX400  
Chemist BH  
Group MGM  
BH4160 F3  
c13acq.au CDC13 (E:\NMR2011) mgmgrp 54

NMR@CHEM.OX

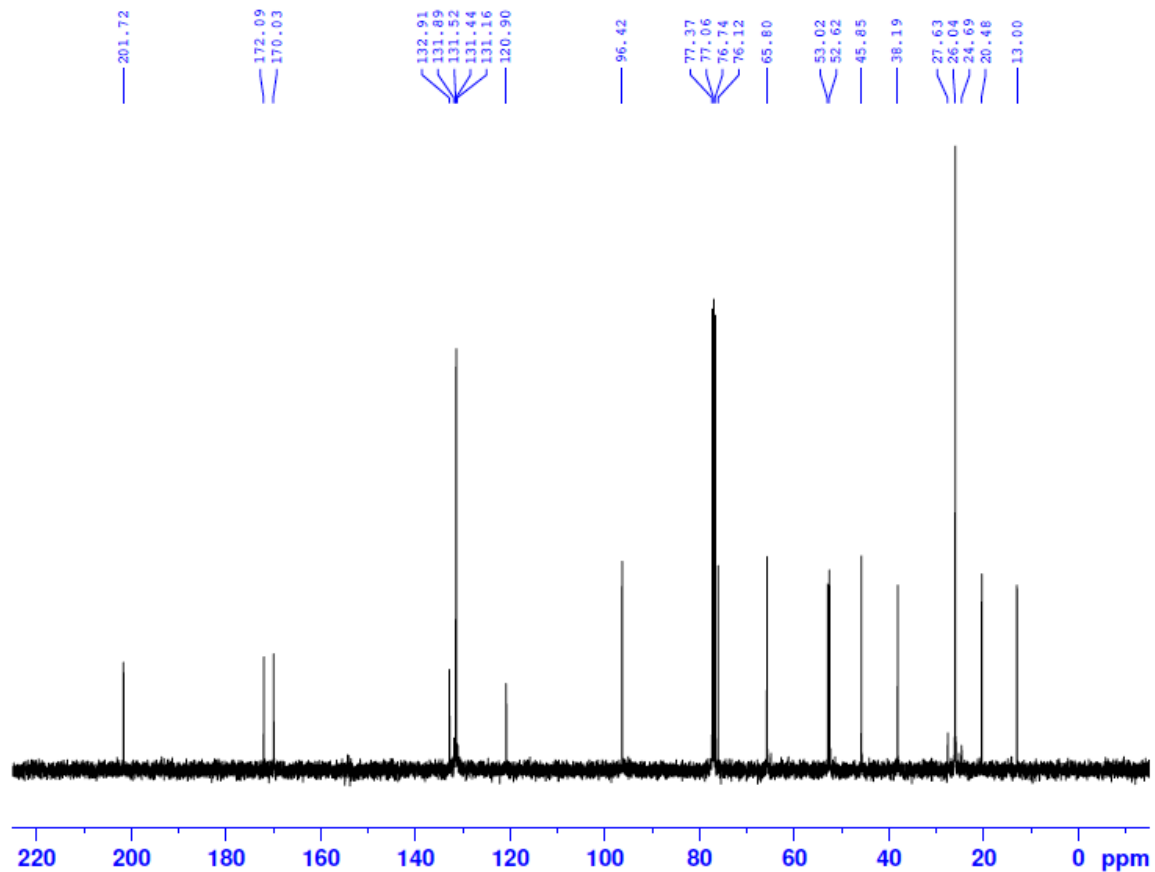

```
NAME      Feb17-2011-54
EXPNO     2
PROCNO    1
Date_     20110218
Time      8.07
INSTRUM   av400
PROBHD    5 mm QNP 1H/13
PULPROG   zgpg30
TD         32768
SOLVENT   CDC13
NS         256
DS         4
SWH        26178.010 Hz
FIDRES     0.798889 Hz
AQ         0.6259188 sec
RG         32768
DW         19.100 usec
DE         7.50 usec
TE         300.0 K
D1         1.00000000 sec
D11        0.03000000 sec
TD0        1

----- CHANNEL f1 -----
NUC1       13C
P1         9.50 usec
PL1        0.00 dB
SFO1       100.6403931 MHz

----- CHANNEL f2 -----
CPDPRG2   waltz16
NUC2       1H
PCPD2     80.00 usec
PL2        0.00 dB
PL12       19.00 dB
PL13       25.00 dB
SFO2       400.2016008 MHz
SI         32768
SF         100.6303718 MHz
WDW        EM
SSB        0
LB         1.00 Hz
GB         0
PC         1.40
```



15c

Instrument DQX400  
Chemist BH  
Group MGM  
BH4160 F2  
hjacq.au CDC13 (F1-NMR2011) mgmgrp 55

NMROCHEM.OX

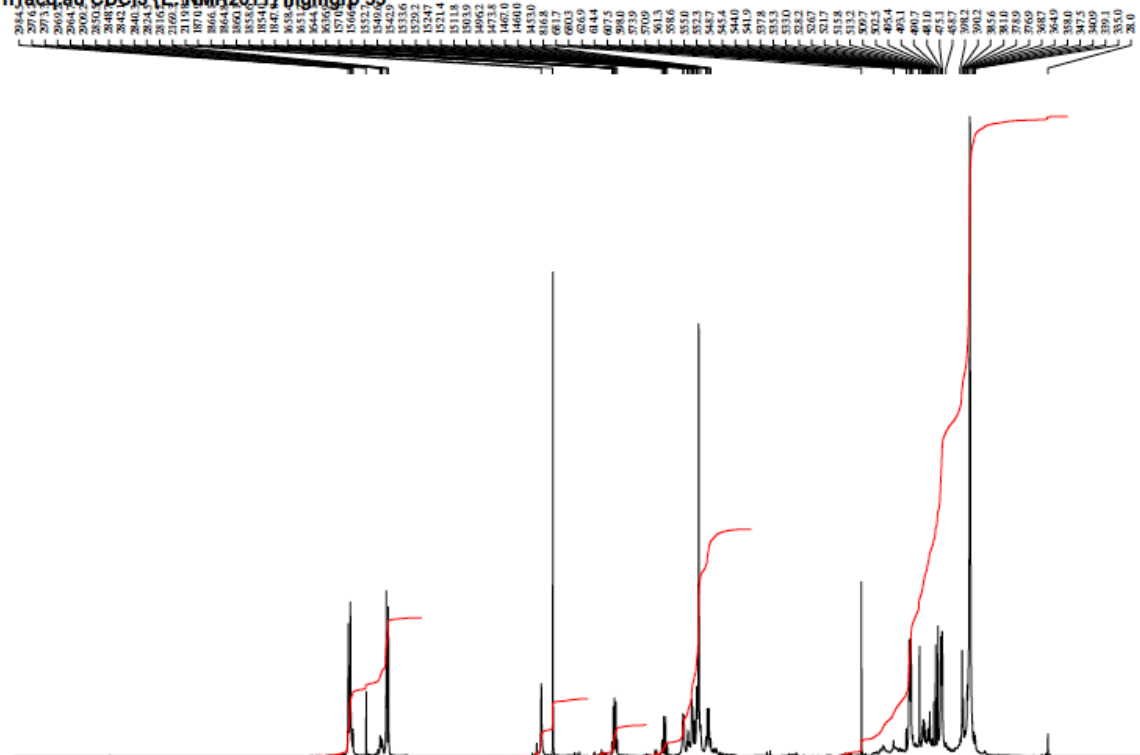

NAME Feb17-2011-54  
EXPNO 6  
PROCNO 1  
Date\_ 20110218  
Time 8.27  
INSTRUM av400  
PROBHD 5 mm QNP 1H/13  
PULPROG zg60  
TD 65536  
SOLVENT CDC13  
NS 16  
DS 2  
SWH 8278.146 Hz  
FIDRES 0.126314 Hz  
AQ 3.9584243 sec  
RG 90.5  
DW 60.400 usec  
DE 7.50 usec  
TE 300.0 K  
D1 1.00000000 sec

----- CHANNEL f1 -----  
NUC1 1H  
P1 9.00 usec  
PL1 0.00 dB  
SFO1 400.2024714 MHz  
SI 32768  
SF 400.2000028 MHz  
WDW EM  
SSB 0  
LB 0.30 Hz  
GB 0  
PC 1.00

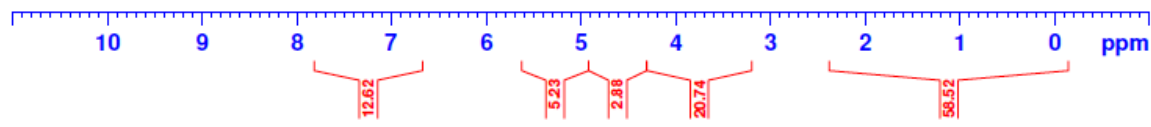

15c

Instrument DQX400  
Chemist BH  
Group MGM  
BH4160 F2  
c13acq.au CDC13 (E:\NMR2011) mgmgrp 55

NMR@CHEM.OX

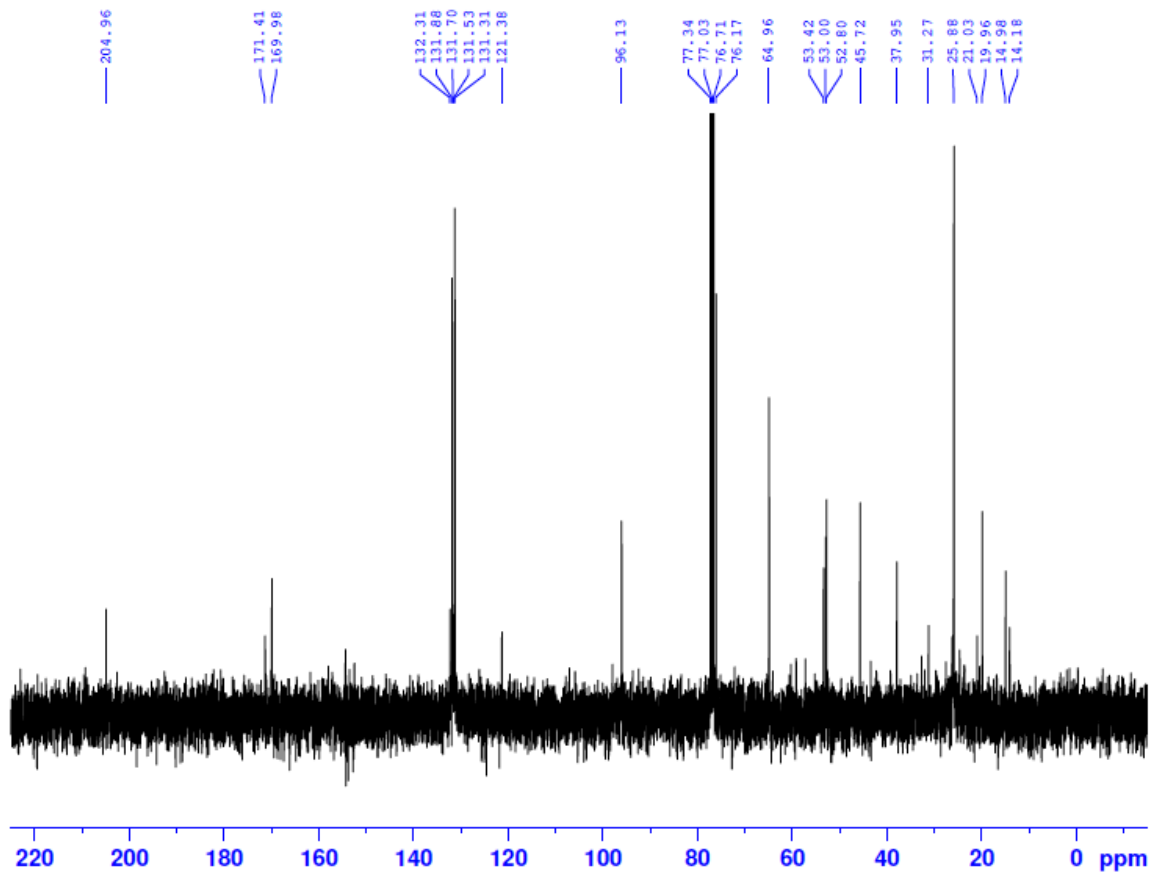

NAME Feb17-2011-54  
EXPNO 7  
PROCNO 1  
Date\_ 20110218  
Time 8.35  
INSTRUM av400  
PROBHD 5 mm QNP 1H/13  
PULPROG zgpg30  
TD 32768  
SOLVENT CDC13  
NS 256  
DS 4  
SWH 26178.010 Hz  
FIDRES 0.798889 Hz  
AQ 0.6259188 sec  
RG 32768  
DW 19.100 usec  
DE 7.50 usec  
TE 300.0 K  
D1 1.0000000 sec  
D11 0.0300000 sec  
TD0 1

----- CHANNEL f1 -----  
NUC1 13C  
P1 9.50 usec  
PL1 0.00 dB  
SFO1 100.6403931 MHz

----- CHANNEL f2 -----  
CPDPRG2 waltz16  
NUC2 1H  
PCPD2 80.00 usec  
PL2 0.00 dB  
PL12 19.00 dB  
PL13 25.00 dB  
SFO2 400.2016008 MHz  
SI 32768  
SF 100.6303718 MHz  
WDW EM  
SSB 0  
LB 1.00 Hz  
GB 0  
PC 1.40

15d'

Instrument DQX400  
Chemist BH  
Group MGM  
BH4182 F6  
h1acq.au CDC13 {E:\NMR2011\mgmgrp 34

NMROCHEM.OX

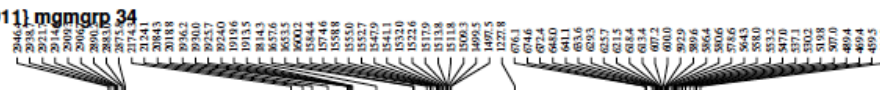

NAME Mar10-2011-33  
EXPNO 6  
PROCNO 1  
Date\_ 20110311  
Time 17.23  
INSTRUM av400  
PROBHD 5 mm QNP 1H/13  
PULPROG zg60  
TD 65536  
SOLVENT CDC13  
NS 16  
DS 2  
SWH 8278.146 Hz  
FIDRES 0.126314 Hz  
AQ 3.9584243 sec  
RG 256  
DW 60.400 usec  
DE 7.50 usec  
TE 300.0 K  
D1 1.00000000 sec

----- CHANNEL f1 -----  
NUC1 1H  
P1 9.00 usec  
PL1 0.00 dB  
SFO1 400.2024714 MHz  
SI 32768  
SF 400.2000028 MHz  
WDW EM  
SSB 0  
LB 0.30 Hz  
GB 0  
PC 1.00

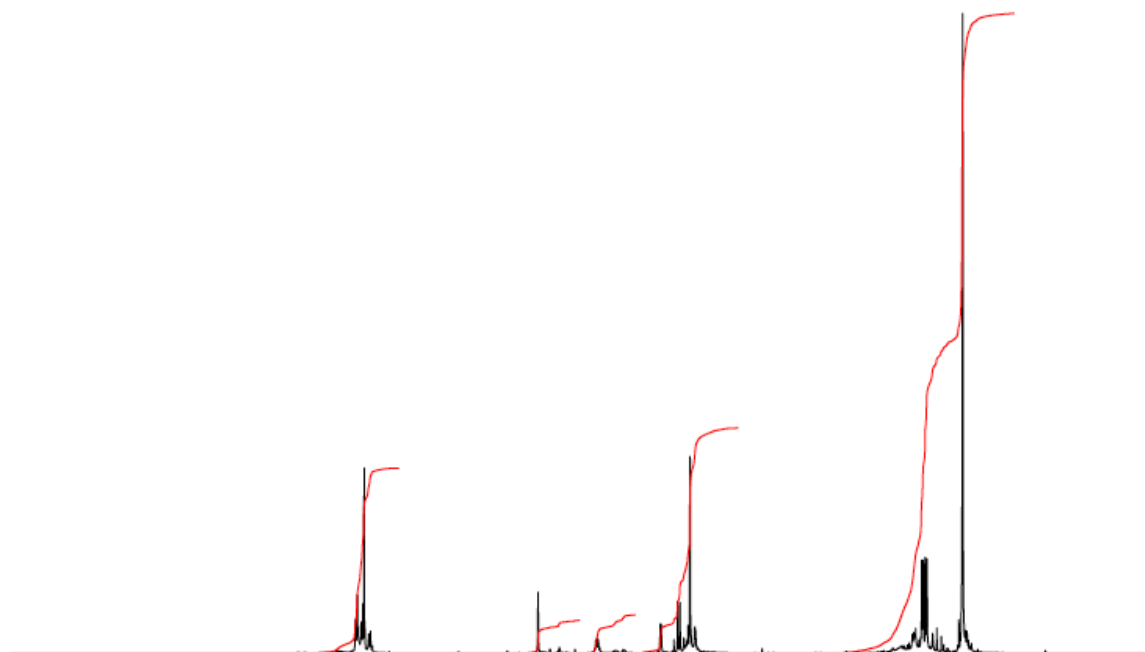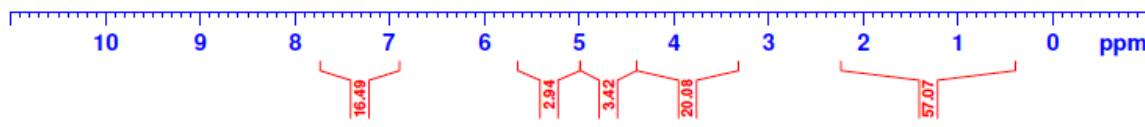

15d'

Instrument DQX400  
Chemist BH  
Group MGM  
BH4182 F6  
c13acq.au CDC13 (E:\NMR2011) mgmgrp 34

NMR@CHEM.OX

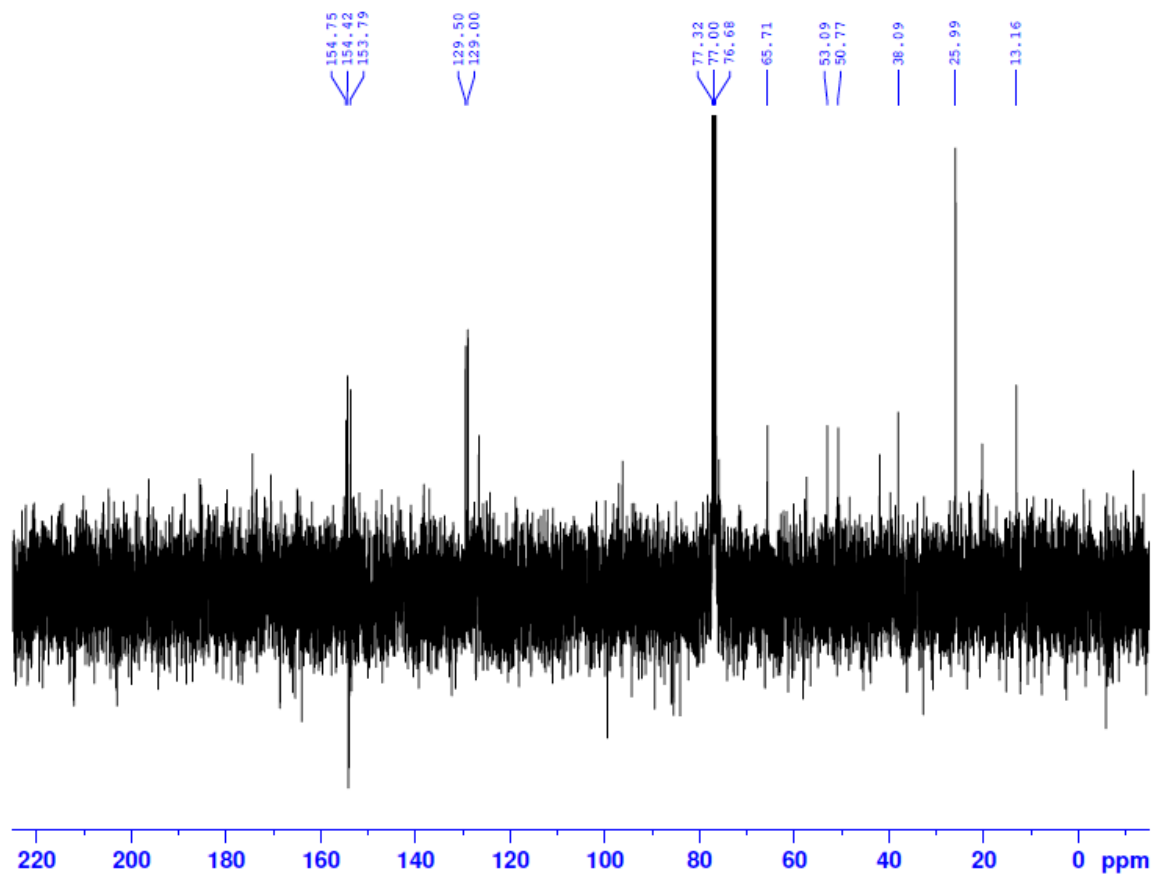

```
NAME Mar10-2011-33
EXPNO 7
PROCNO 1
Date_ 20110311
Time 17.31
INSTRUM av400
PROBHD 5 mm QNP 1H/13
PULPROG zgpg30
TD 32768
SOLVENT CDC13
NS 256
DS 4
SWH 26178.010 Hz
FIDRES 0.798889 Hz
AQ 0.6259188 sec
RG 32768
DW 19.100 usec
DE 7.50 usec
TE 300.0 K
D1 1.00000000 sec
D11 0.03000000 sec
TD0 1

----- CHANNEL f1 -----
NUC1 13C
P1 9.50 usec
PL1 0.00 dB
SFO1 100.6403931 MHz

----- CHANNEL f2 -----
CPDPRG2 waltz16
NUC2 1H
PCPD2 80.00 usec
PL2 0.00 dB
PL12 19.00 dB
PL13 25.00 dB
SFO2 400.2016008 MHz
SI 32768
SF 100.6303718 MHz
WDW EM
SSB 0
LB 1.00 Hz
GB 0
PC 1.40
```

15d

Instrument DQX400  
Chemist BH  
Group MGM  
BH4182 F5  
hjacq.au CDC13 (E: NMR2011) mgmgrp 33

NMRCHEM.OX

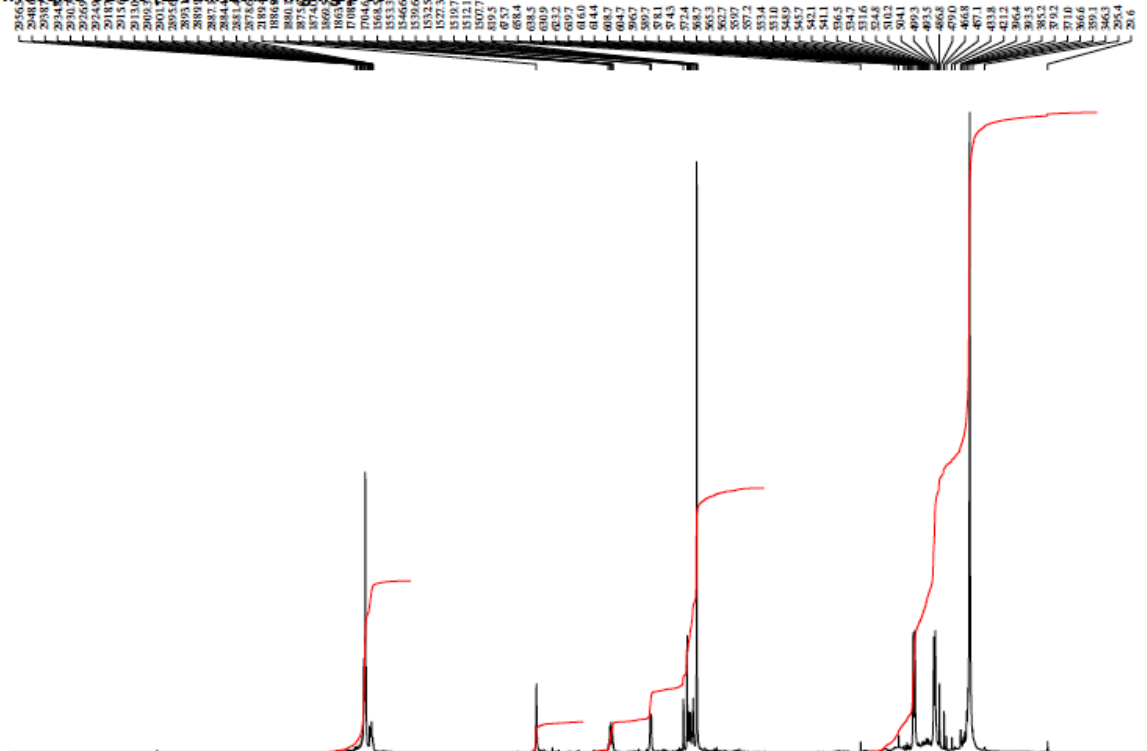

|                        |                 |
|------------------------|-----------------|
| NAME                   | Mar10-2011-33   |
| EXPNO                  | 1               |
| PROCNO                 | 1               |
| Date_                  | 20110311        |
| Time                   | 16.54           |
| INSTRUM                | av400           |
| PROBHD                 | 5 mm QNP 1H/13  |
| PULPROG                | zg60            |
| TD                     | 65536           |
| SOLVENT                | CDC13           |
| NS                     | 16              |
| DS                     | 2               |
| SWH                    | 8278.146 Hz     |
| FIDRES                 | 0.126314 Hz     |
| AQ                     | 3.9584243 sec   |
| RG                     | 90.5            |
| DW                     | 60.400 usec     |
| DE                     | 7.50 usec       |
| TE                     | 300.0 K         |
| D1                     | 1.00000000 sec  |
| ----- CHANNEL f1 ----- |                 |
| NUC1                   | 1H              |
| P1                     | 9.00 usec       |
| PL1                    | 0.00 dB         |
| SFO1                   | 400.2024714 MHz |
| SI                     | 32768           |
| SF                     | 400.2000028 MHz |
| WDW                    | EM              |
| SSB                    | 0               |
| LB                     | 0.30 Hz         |
| GB                     | 0               |
| PC                     | 1.00            |

10 9 8 7 6 5 4 3 2 1 0 ppm

15.50 2.73 20.88 57.89

15d

Instrument DQX400  
Chemist BH  
Group MGM  
BH4182 F5  
c13acq.au CDC13 (E:\NMR2011) mgmgrp 33

NMR@CHEM.OX

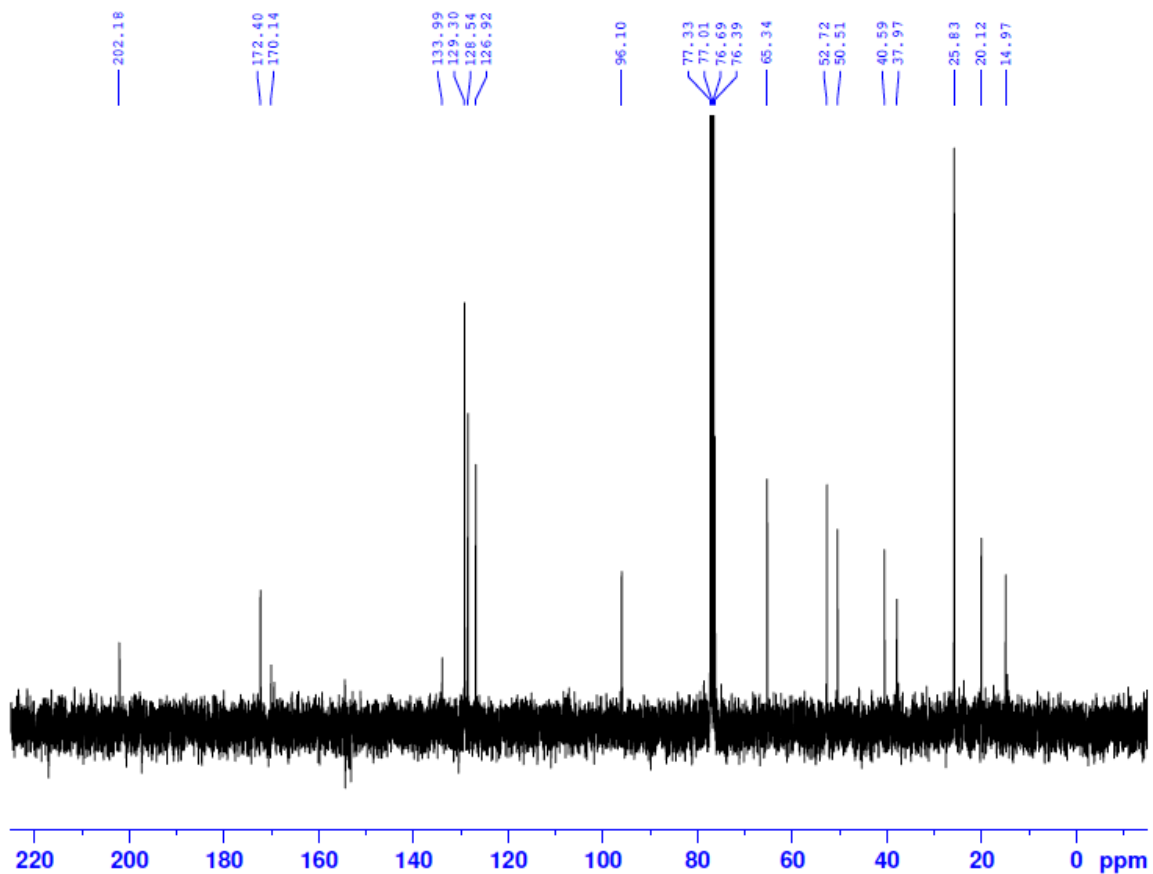

```
NAME Mar10-2011-33
EXPNO 2
PROCNO 1
Date_ 20110311
Time 17.02
INSTRUM av400
PROBHD 5 mm QNP 1H/13
PULPROG zgpg30
TD 32768
SOLVENT CDC13
NS 256
DS 4
SWH 26178.010 Hz
FIDRES 0.798889 Hz
AQ 0.6259188 sec
RG 32768
DW 19.100 usec
DE 7.50 usec
TE 300.0 K
D1 1.00000000 sec
D11 0.03000000 sec
TD0 1

----- CHANNEL f1 -----
NUC1 13C
P1 9.50 usec
PL1 0.00 dB
SFO1 100.6403931 MHz

----- CHANNEL f2 -----
CPDPRG2 waltz16
NUC2 1H
PCPD2 80.00 usec
PL2 0.00 dB
PL12 19.00 dB
PL13 25.00 dB
SFO2 400.2016008 MHz
SI 32768
SF 100.6303718 MHz
WDW EM
SSB 0
LB 1.00 Hz
GB 0
PC 1.40
```

Instrument DQX400  
 Chemist BH  
 Group MGM  
 BH3200 F1+2  
 h1acq au CDC13 (C-NMB) mgmgrp 52

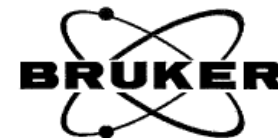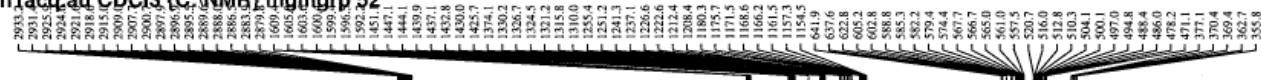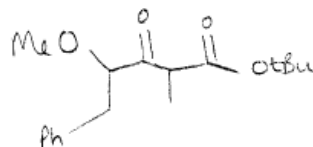

NAME Sep07-2010-52  
 EXPNO 1  
 PROCNO 1  
 Date\_ 20100907  
 Time 10.40  
 INSTRUM av400  
 PROBHD 5 mm QNP 1H/13  
 PULPROG zg60  
 TD 65536  
 SOLVENT CDC13  
 NS 16  
 DS 2  
 SWH 8278.146 H  
 FIDRES 0.126314 H  
 AQ 3.9584243 s  
 RG 128  
 DW 60.400 u  
 DE 7.50 u  
 TE 300.0 K  
 D1 1.00000000 s

----- CHANNEL f1 -----  
 NUC1 1H  
 P1 9.00 u  
 PL1 0.00 dB  
 SFO1 400.2024714 MHz  
 SI 32768  
 SF 400.2000028 MHz  
 WDW EM  
 SSB 0  
 LB 0.30 Hz  
 GB 0  
 PC 1.00

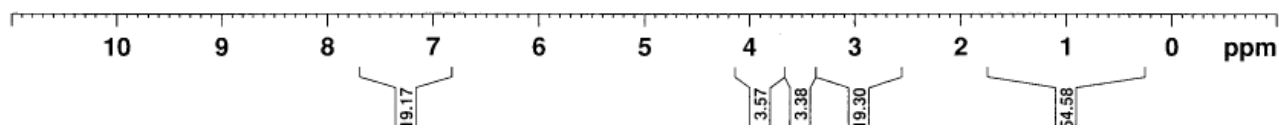

Instrument DQX400  
 Chemist BH  
 Group MGM  
 BH3200 F1+2  
 c13acq.au CDC13 {C:NMR} mgmgrp 52

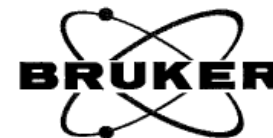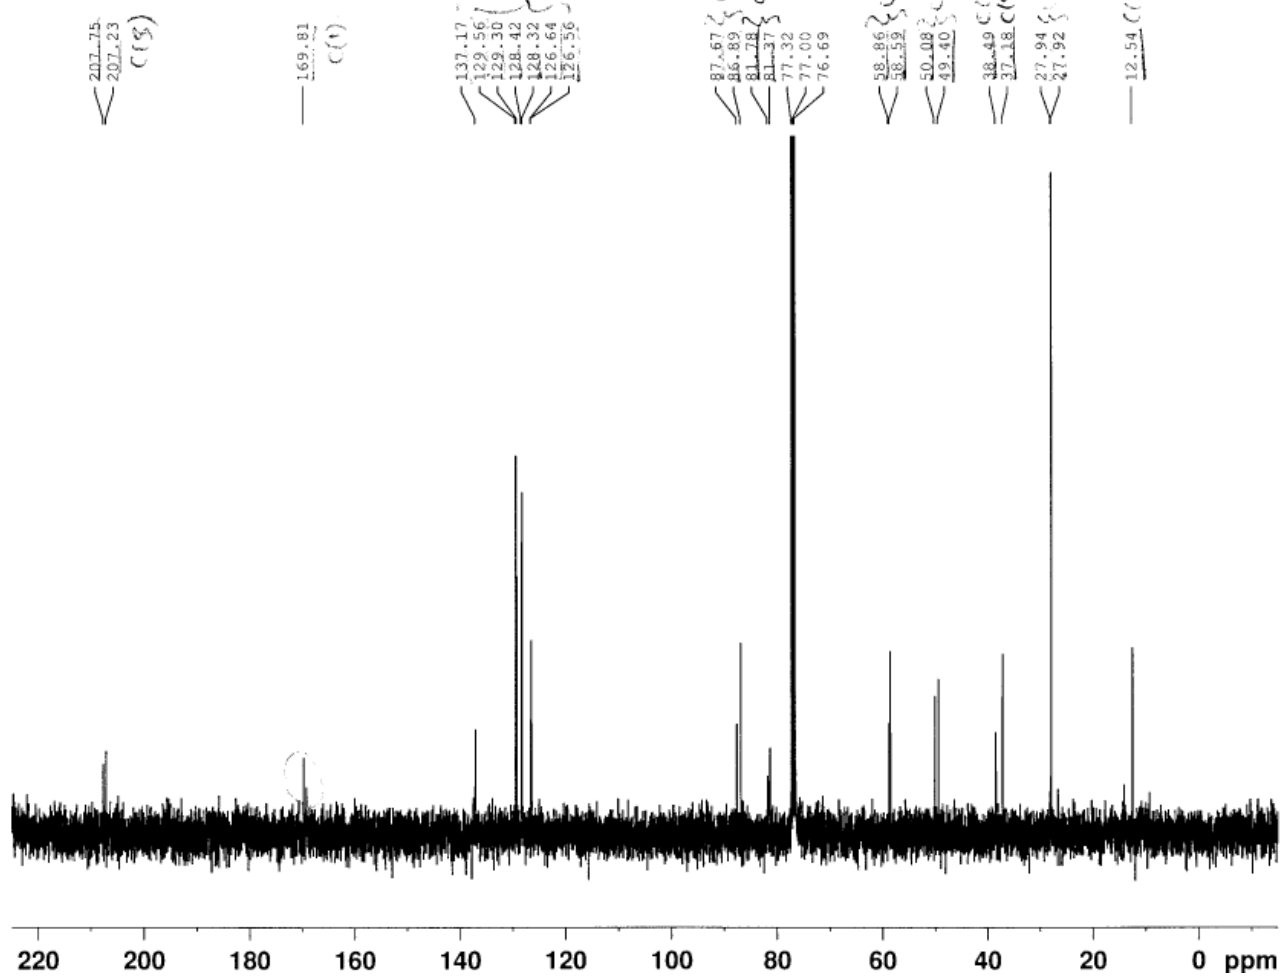

```

NAME      Sep07-2010-52
EXPNO     2
PROCNO    1
Date_     20100907
Time      10.48
INSTRUM   av400
PROBHD    5 mm QNP 1H/13
PULPROG   zgpg30
TD         32768
SOLVENT   CDC13
NS         256
DS         4
SWH        26178.010 F
FIDRES     0.798889 F
AQ         0.6259188 s
RG         32768
DW         19.100 u
DE         7.50 u
TE         300.0 K
D1         1.0000000 s
D11        0.0300000 s
TD0        1
  
```

```

===== CHANNEL f1 =====
NUC1      13C
P1        9.50 u
PL1       0.00 c
SFO1     100.6403931 M
  
```

```

===== CHANNEL f2 =====
CPDPRG2   waltz16
NUC2      1H
PCPD2     80.00 u
PL2       0.00 c
PL12      19.00 c
PL13      25.00 c
SFO2     400.2016008 M
SI        32768
SF        100.6303718 M
WDW       EM
SSB       0
LB        1.00 F
GB        0
PC        1.40
  
```



Instrument DQX400  
 Chemist BH  
 Group MGM  
 BH3206

h1acq au CDCl3 (C:NMB) mgmgrp 44

NMRCHEM.OX

3540 3530 3520 3510 3500 3490 3480 3470 3460 3450 3440 3430 3420 3410 3400 3390 3380 3370 3360 3350 3340 3330 3320 3310 3300 3290 3280 3270 3260 3250 3240 3230 3220 3210 3200 3190 3180 3170 3160 3150 3140 3130 3120 3110 3100 3090 3080 3070 3060 3050 3040 3030 3020 3010 3000 2990 2980 2970 2960 2950 2940 2930 2920 2910 2900 2890 2880 2870 2860 2850 2840 2830 2820 2810 2800 2790 2780 2770 2760 2750 2740 2730 2720 2710 2700 2690 2680 2670 2660 2650 2640 2630 2620 2610 2600 2590 2580 2570 2560 2550 2540 2530 2520 2510 2500 2490 2480 2470 2460 2450 2440 2430 2420 2410 2400 2390 2380 2370 2360 2350 2340 2330 2320 2310 2300 2290 2280 2270 2260 2250 2240 2230 2220 2210 2200 2190 2180 2170 2160 2150 2140 2130 2120 2110 2100 2090 2080 2070 2060 2050 2040 2030 2020 2010 2000 1990 1980 1970 1960 1950 1940 1930 1920 1910 1900 1890 1880 1870 1860 1850 1840 1830 1820 1810 1800 1790 1780 1770 1760 1750 1740 1730 1720 1710 1700 1690 1680 1670 1660 1650 1640 1630 1620 1610 1600 1590 1580 1570 1560 1550 1540 1530 1520 1510 1500 1490 1480 1470 1460 1450 1440 1430 1420 1410 1400 1390 1380 1370 1360 1350 1340 1330 1320 1310 1300 1290 1280 1270 1260 1250 1240 1230 1220 1210 1200 1190 1180 1170 1160 1150 1140 1130 1120 1110 1100 1090 1080 1070 1060 1050 1040 1030 1020 1010 1000 990 980 970 960 950 940 930 920 910 900 890 880 870 860 850 840 830 820 810 800 790 780 770 760 750 740 730 720 710 700 690 680 670 660 650 640 630 620 610 600 590 580 570 560 550 540 530 520 510 500 490 480 470 460 450 440 430 420 410 400 390 380 370 360 350 340 330 320 310 300 290 280 270 260 250 240 230 220 210 200 190 180 170 160 150 140 130 120 110 100 90 80 70 60 50 40 30 20 10 0

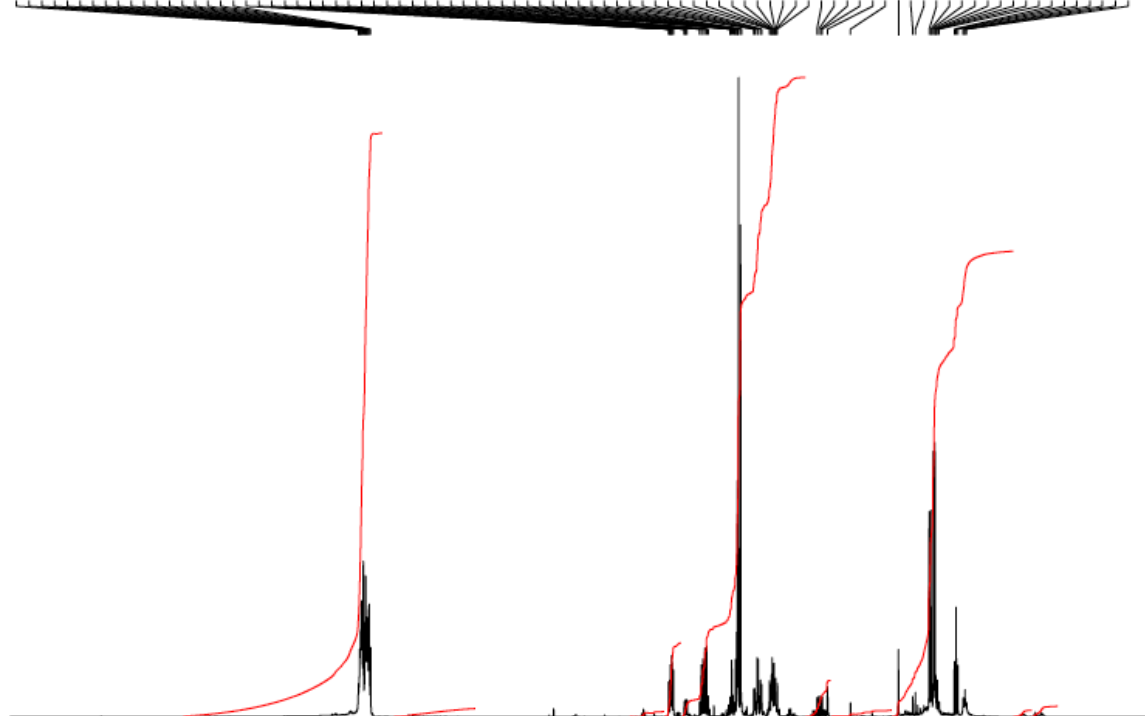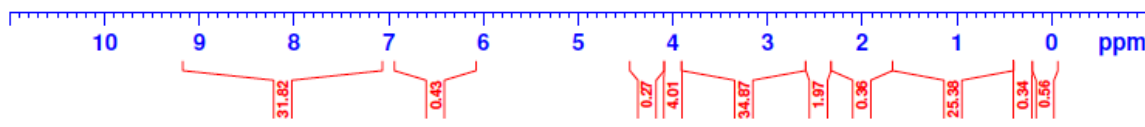

```

NAME          Sep13-2010-44
EXPNO         1
PROCNO        1
Date_         20100913
Time          17.02
INSTRUM       av400
PROBHD        5 mm QNP 1H/13
PULPROG       zg60
TD            65536
SOLVENT       CDCl3
NS            16
DS            2
SWH           8278.146 Hz
FIDRES        0.126314 Hz
AQ            3.9584243 sec
RG            128
DW            60.400 usec
DE            7.50 usec
TE            300.0 K
D1            1.00000000 sec

----- CHANNEL f1 -----
NUC1          1H
P1            9.00 usec
PL1           0.00 dB
SFO1          400.2024714 MHz
SI            32768
SF            400.2000028 MHz
WDW           EM
SSB           0
LB            0.30 Hz
GB            0
PC            1.00
  
```

Instrument DQX400  
 Chemist BH  
 Group MGM  
 BH3206  
 c13acq.au CDC13 {C:\NMR} mgmgrp 44

NMR@CHEM.OX

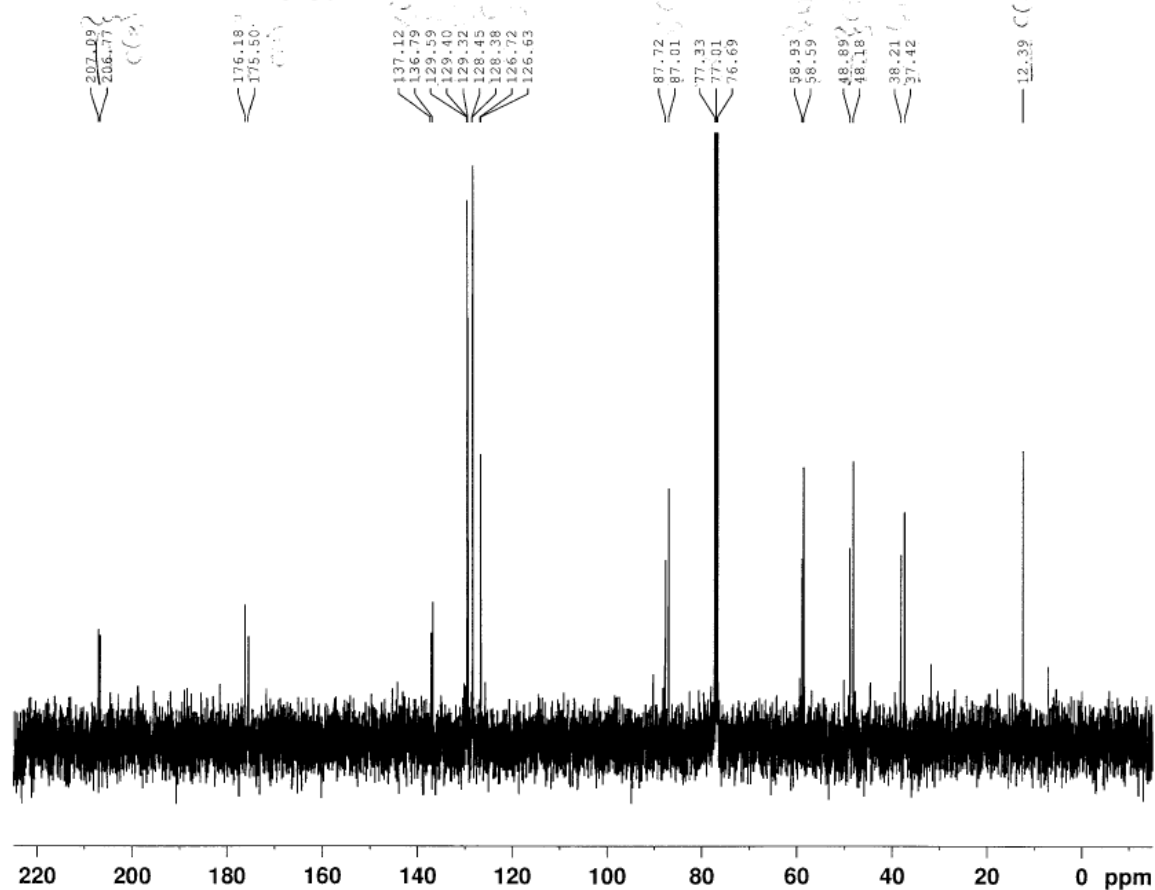

```

NAME      Sep13-2010-44
EXPNO     3
PROCNO    1
Date_     20100913
Time      17.14
INSTRUM   av400
PROBHD    5 mm QNP 1H/13
PULPROG   zgpg30
TD         32768
SOLVENT   CDC13
NS         256
DS         4
SWH        26178.010 |
FIDRES     0.798889 |
AQ         0.6259188 |
RG         32768
DW         19.100 |
DE         7.50 |
TE         300.0 |
D1         1.00000000 |
D11        0.03000000 |
TD0        1
  
```

```

===== CHANNEL f1 =====
NUC1       13C
P1         9.50 |
PL1        0.00 |
SFO1       100.6403931 |
  
```

```

===== CHANNEL f2 =====
CPDPRG2    waltz16
NUC2       1H
PCPD2      80.00 |
PL2        0.00 |
PL12       19.00 |
PL13       25.00 |
SFO2       400.2016008 |
SI         32768
SF         100.6303718 |
WDW        EM
SSB        0
LB         1.00 |
GB         0
PC         1.40
  
```

Instrument DQX400  
 Chemist BH  
 Group MGM  
 BH422

h1acq au CDC13 (C-NMR) mgmgrp 49

NMR@CHEM.OX

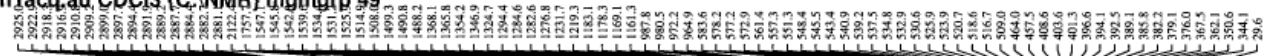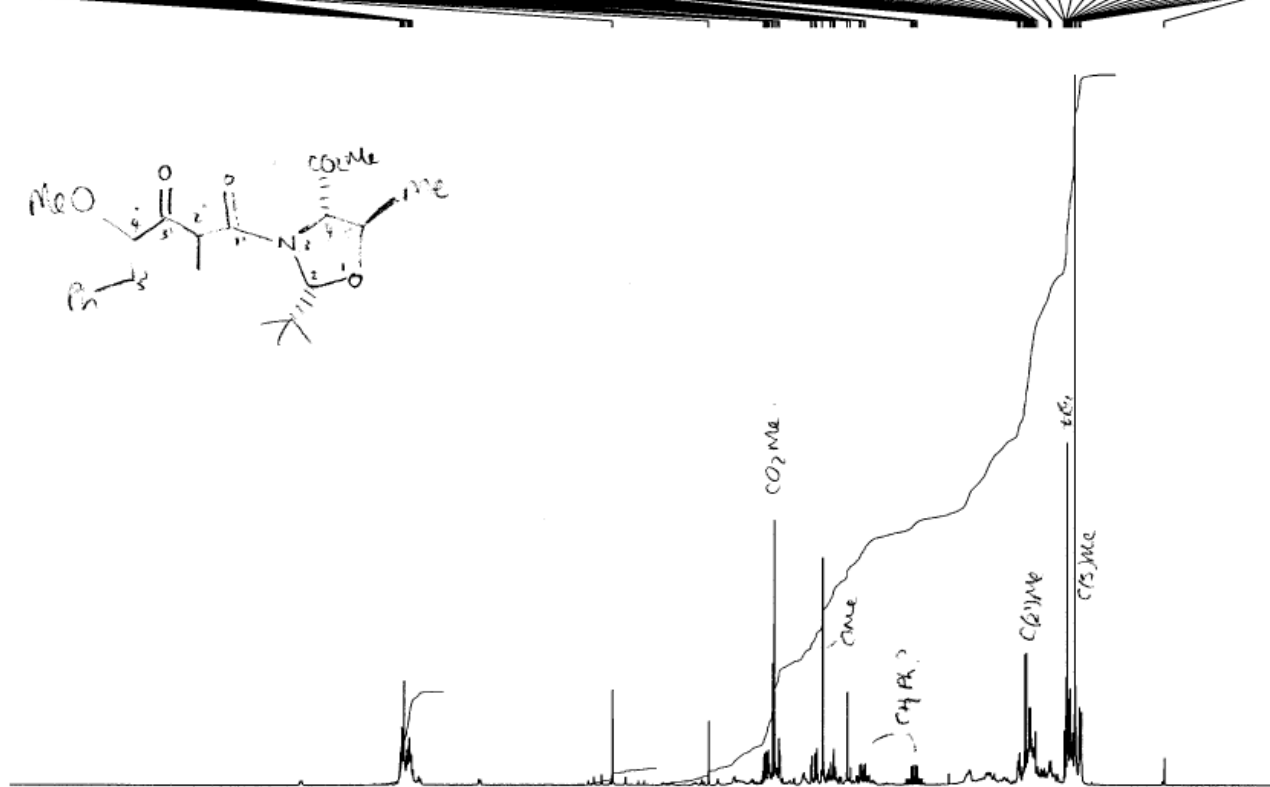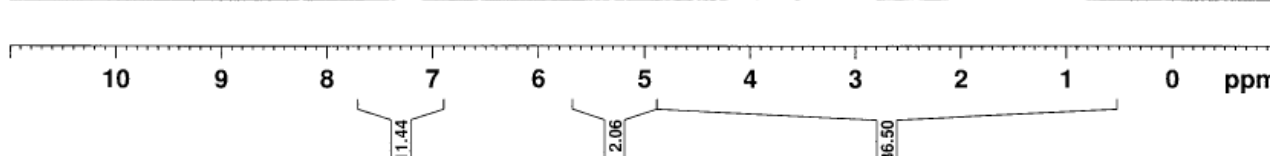

NAME Sep14-2010-49  
 EXPNO 1  
 PROCNO 1  
 Date\_ 20100914  
 Time 20.39  
 INSTRUM av400  
 PROBHD 5 mm QNP 1H/13  
 PULPROG zg60  
 TD 65536  
 SOLVENT CDC13  
 NS 16  
 DS 2  
 SWH 8278.146 H  
 FIDRES 0.126314 H  
 AQ 3.9584243 s  
 RG 128  
 DW 60.400 u  
 DE 7.50 u  
 TE 300.0 K  
 D1 1.00000000 s

----- CHANNEL f1 -----  
 NUC1 13C  
 P1 9.00 u  
 PL1 0.00 d  
 SF01 400.2024714 M  
 SI 32768  
 SF 400.2000028 M  
 WDW EM  
 SSB 0  
 LB 0.30 H  
 GB 0  
 PC 1.00

Instrument DQX400  
 Chemist BH  
 Group MGM  
 BH422  
 c13acq.au CDCl3 {C:\NMR} mgmgrp 49

NMR@CHEM.OX

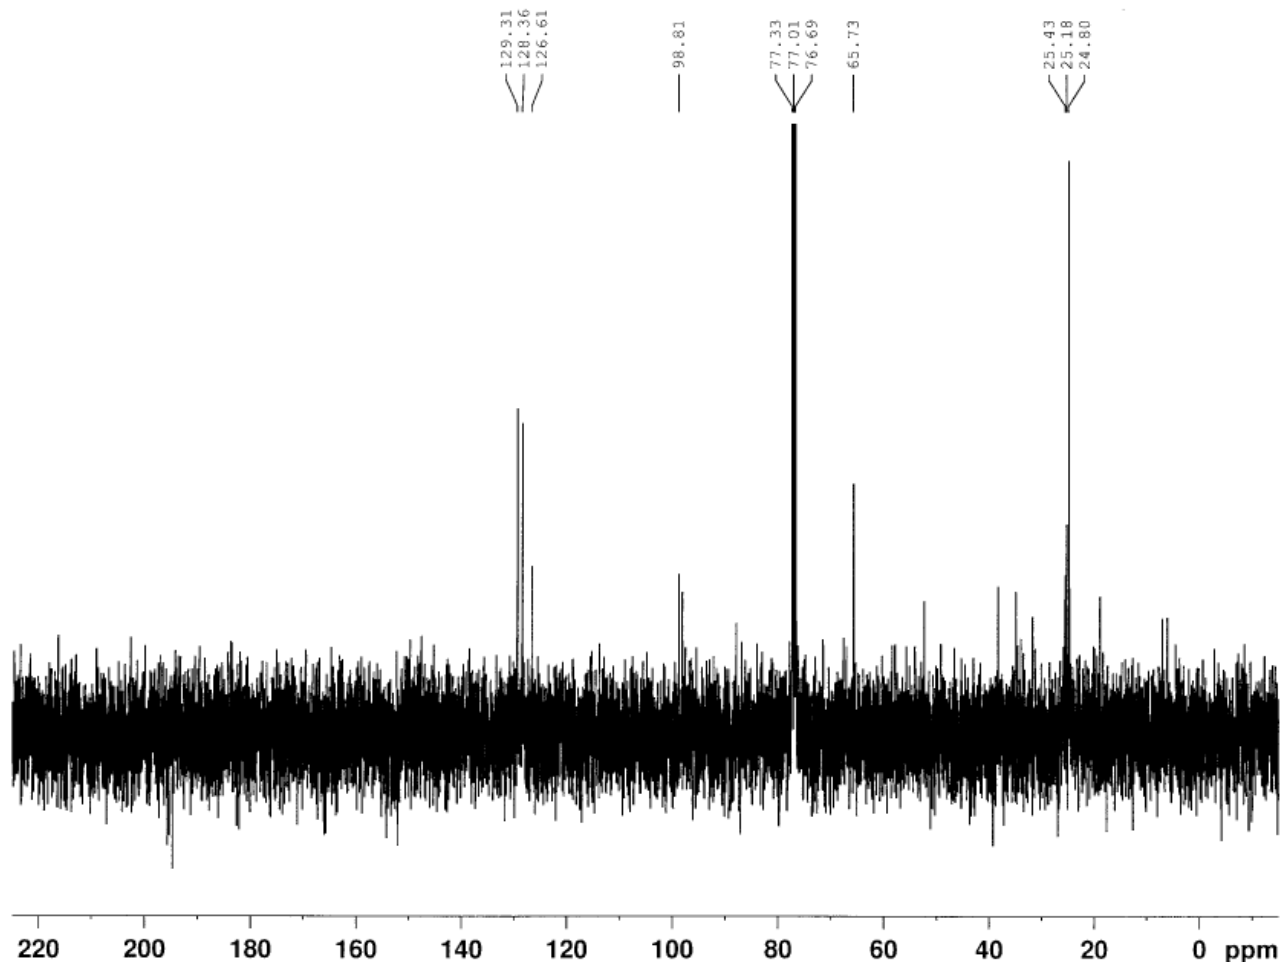

```

NAME      Sep14-2010-49
EXPNO     2
PROCNO    1
Date_     20100914
Time      20.47
INSTRUM   av400
PROBHD    5 mm QNP 1H/13
PULPROG   zgpg30
TD         32768
SOLVENT   CDCl3
NS         256
DS         4
SWH       26178.010 Hz
FIDRES    0.798889 Hz
AQ         0.6259188 s
RG         32768
DW         19.100 us
DE         7.50 us
TE         300.0 K
D1         1.00000000 s
D11        0.03000000 s
TD0        1
  
```

```

===== CHANNEL f1 =====
NUC1      13C
P1        9.50 us
PL1       0.00 dB
SFO1     100.6403931 MHz
  
```

```

===== CHANNEL f2 =====
CPDPRG2   waltz16
NUC2      1H
PCPD2     80.00 us
PL2       0.00 dB
PL12      19.00 dB
PL13      25.00 dB
SFO2     400.2016008 MHz
SI        32768
SF        100.6303718 MHz
WDW       EM
SSB       0
LB        1.00 Hz
GB        0
PC        1.40
  
```

19a

Instrument DQX400  
Chemist BH  
Group MGM  
BH5100

h1acq au CDCl3 (F1: NMR2011) mgmgrp 59

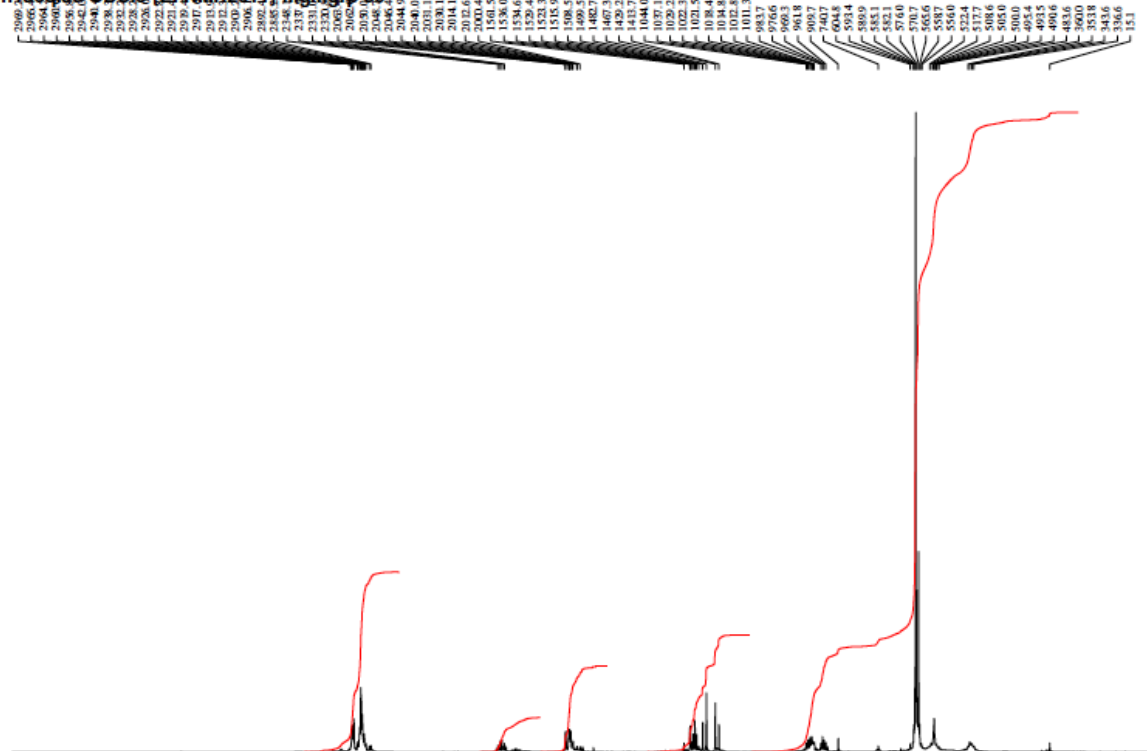

NMRCHEM.OX

NAME Aug05-2011-59  
EXPNO 1  
PROCNO 1  
Date\_ 20110805  
Time 14.02  
INSTRUM av400  
PROBHD 5 mm QNP 1H/13  
PULPROG zg60  
TD 65536  
SOLVENT CDCl3  
NS 16  
DS 2  
SWH 8278.146 Hz  
FIDRES 0.126314 Hz  
AQ 3.9584243 sec  
RG 35.9  
DW 60.400 usec  
DE 7.50 usec  
TE 300.0 K  
D1 1.00000000 sec

----- CHANNEL f1 -----  
NUC1 1H  
P1 9.00 usec  
PL1 0.00 dB  
SFO1 400.2024714 MHz  
SI 32768  
SF 400.2000028 MHz  
WDW EM  
SSB 0  
LB 0.30 Hz  
GB 0  
PC 1.00

19a

Instrument DQX400  
Chemist BH  
Group MGM  
BH5100  
c13acq.au CDC13 (E:\NMR2011) mgmgrp 59

NMR@CHEM.OX

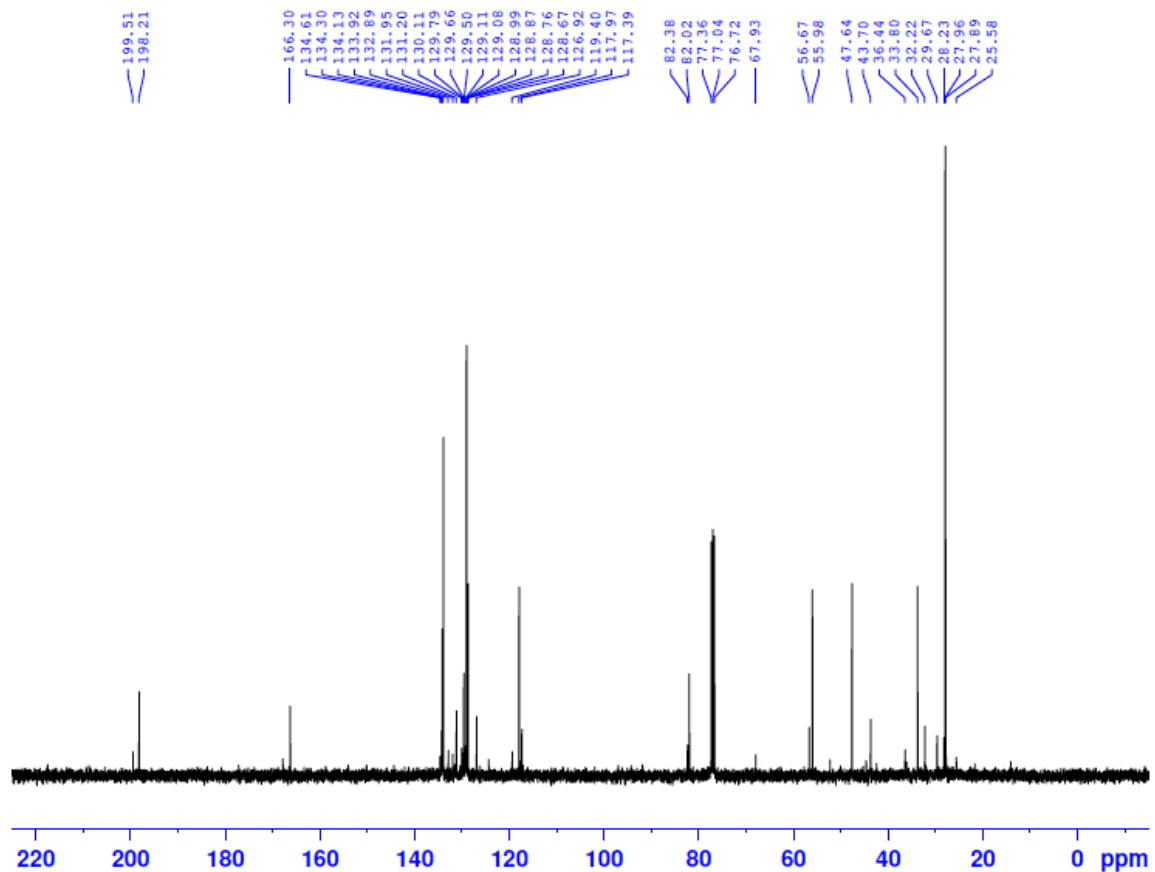

```
NAME Aug05-2011-59
EXPNO 2
PROCNO 1
Date_ 20110805
Time 14.10
INSTRUM av400
PROBHD 5 mm QNP 1H/13
PULPROG zgpg30
TD 32768
SOLVENT CDC13
NS 256
DS 4
SWH 26178.010 Hz
FIDRES 0.798889 Hz
AQ 0.6259188 sec
RG 32768
DW 19.100 usec
DE 7.50 usec
TE 300.0 K
D1 1.00000000 sec
D11 0.03000000 sec
TD0 1

----- CHANNEL f1 -----
NUC1 13C
P1 9.50 usec
PL1 0.00 dB
SFO1 100.6403931 MHz

----- CHANNEL f2 -----
CPDPRG2 waltz16
NUC2 1H
PCPD2 80.00 usec
PL2 0.00 dB
PL12 19.00 dB
PL13 25.00 dB
SFO2 400.2016008 MHz
SI 32768
SF 100.6303718 MHz
WDW EM
SSB 0
LB 1.00 Hz
GB 0
PC 1.40
```

Instrument DQX400  
Chemist BH  
Group MGM  
BH590 F3  
h1acq.au CDC13 (E: NMR2011) mgmgrp 37

NMROCHEM.OX

2953.0 2949.8 2948.4 2946.4 2944.9 2941.5 2938.8 2938.5 2935.1 2927.2 2927.0 2925.2 2922.7 2918.0 2915.0 2913.8 2910.7 2907.0 2903.3 2900.8 2898.9 2896.9 2893.9 2890.1 2888.7 2887.0 2885.9 2883.7 2865.5 2865.4 2863.8 2861.8 2859.3 1653.7 1646.1 1638.6 1636.6 1634.5 1632.4 1609.6 1609.6 1608.0 1605.5 1470.5 1461.3 1446.1 1435.8 1425.8 1416.3 1403.9 1395.8 1392.8 1382.4 1377.9 1286.0 1264.5 1244.9 1240.3 1185.9 1185.7 1181.6 1177.4 1175.7 869.7 597.9 594.9 594.8 573.8 564.2 557.7 551.6 548.2 543.4 526.6 526.6 501.5 490.9 480.5 377.8 371.1 364.4

NAME Aug02-2011-37  
EXPNO 1  
PROCNO 1  
Date\_ 20110803  
Time 3.16  
INSTRUM av400  
PROBHD 5 mm QNP 1H/13  
PULPROG zg60  
TD 65536  
SOLVENT CDCl3  
NS 16  
DS 2  
SWH 8278.146 Hz  
FIDRES 0.126314 Hz  
AQ 3.9584243 sec  
RG 35.9  
DW 60.400 usec  
DE 7.50 usec  
TE 300.0 K  
D1 1.00000000 sec

----- CHANNEL f1 -----  
NUC1 1H  
P1 9.00 usec  
PL1 0.00 dB  
SFO1 400.2024714 MHz  
SI 32768  
SF 400.2000028 MHz  
WDW EM  
SSB 0  
LB 0.30 Hz  
GB 0  
PC 1.00

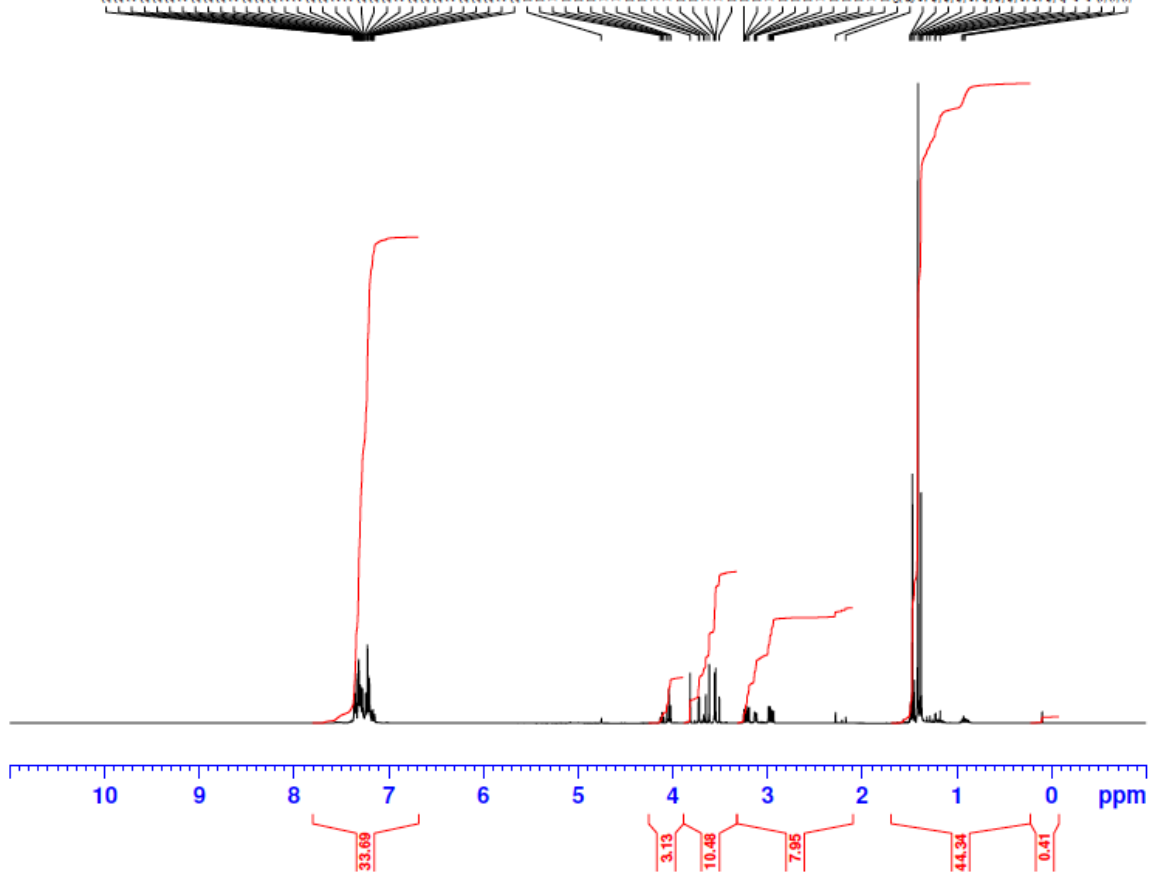

19b

Instrument DQX400  
 Chemist BH  
 Group MGM  
 BH590 F3  
 c13acq.au CDCl3 [E:\NMR2011] mgmgrp 37

NMR@CHEM.OX

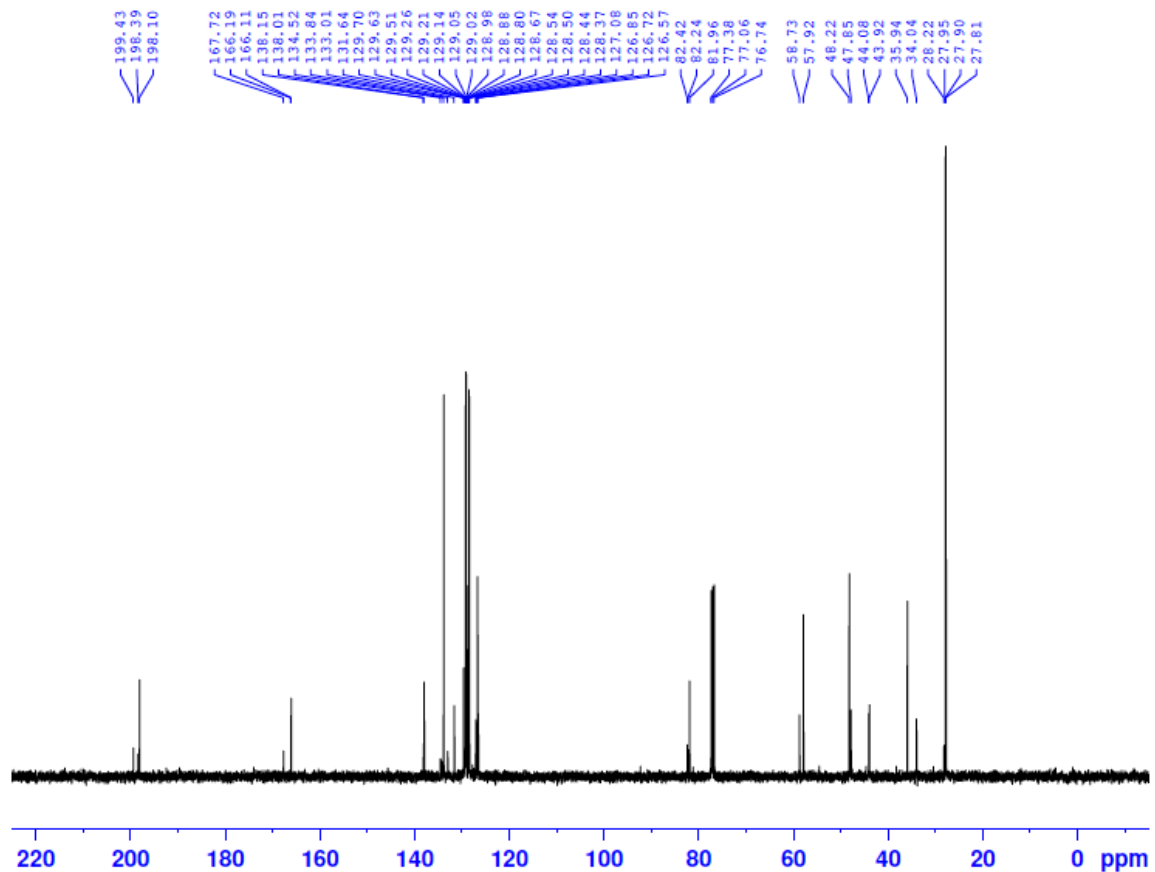

```

NAME      Aug02-2011-37
EXPNO     2
PROCNO    1
Date_     20110803
Time      3.24
INSTRUM   av400
PROBHD    5 mm QNP 1H/13
PULPROG   zgpg30
TD        32768
SOLVENT   CDCl3
NS        256
DS        4
SWH       26178.010 Hz
FIDRES    0.798889 Hz
AQ        0.6259188 sec
RG        32768
DW        19.100 usec
DE        7.50 usec
TE        300.0 K
D1        1.00000000 sec
D11       0.03000000 sec
TD0       1

----- CHANNEL f1 -----
NUC1      13C
P1        9.50 usec
PL1       0.00 dB
SFO1     100.6403931 MHz

----- CHANNEL f2 -----
CPDPRG2   waltz16
NUC2      1H
PCPD2     80.00 usec
PL2       0.00 dB
PL12      19.00 dB
PL13      25.00 dB
SFO2     400.2016008 MHz
SI        32768
SF       100.6303718 MHz
WDW       EM
SSB       0
LB        1.00 Hz
GB        0
PC        1.40
  
```



20a

Instrument DQX400  
Chemist BH  
Group MGM  
BH5108

h1acc au CDCl3 (F: NMR2011) mgmgrp 38

NMR@CHEM.OX

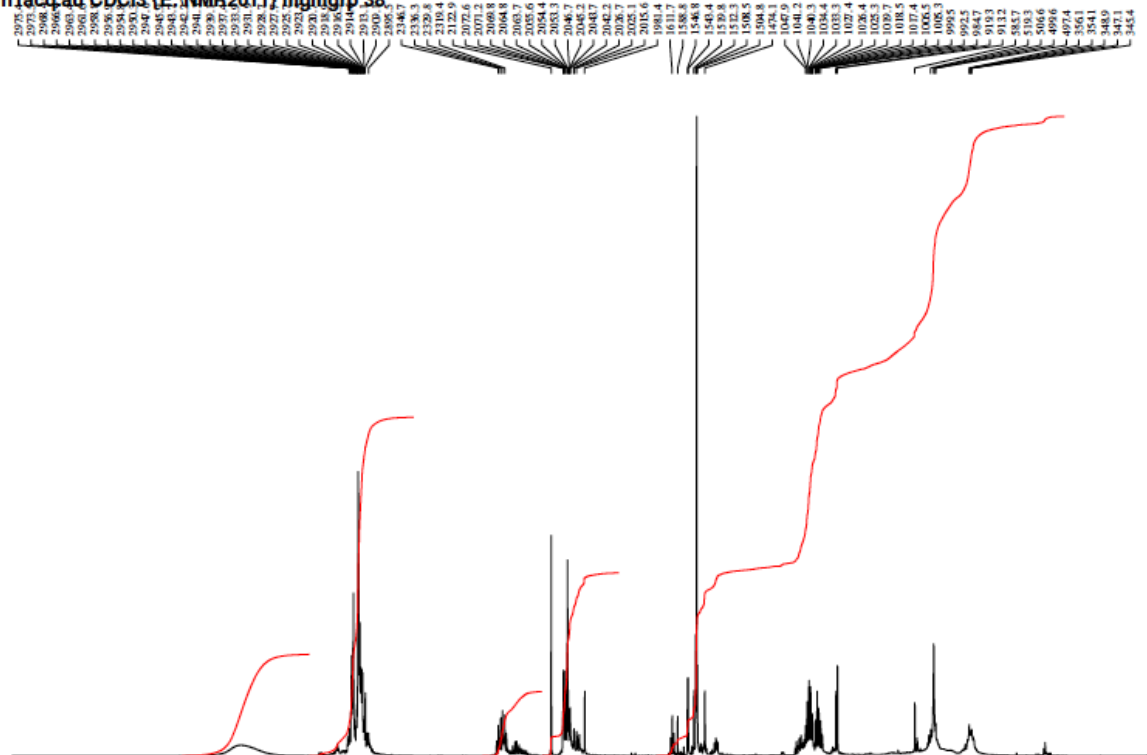

NAME Aug08-2011-38  
EXPNO 1  
PROCNO 1  
Date\_ 20110808  
Time 23.24  
INSTRUM av400  
PROBHD 5 mm QNP 1H/13  
PULPROG zg60  
TD 65536  
SOLVENT CDCl3  
NS 16  
DS 2  
SWH 8278.146 Hz  
FIDRES 0.126314 Hz  
AQ 3.9584243 sec  
RG 128  
DW 60.400 usec  
DE 7.50 usec  
TE 300.0 K  
D1 1.00000000 sec

----- CHANNEL f1 -----  
NUC1 1H  
P1 9.00 usec  
PL1 0.00 dB  
SFO1 400.2024714 MHz  
SI 32768  
SF 400.2000028 MHz  
WDW EM  
SSB 0  
LB 0.30 Hz  
GB 0  
PC 1.00

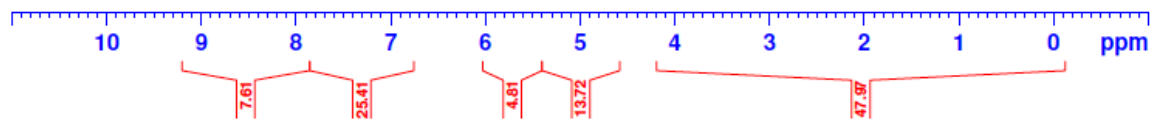

20a

Instrument DQX400  
Chemist BH  
Group MGM  
BH5108  
c13acq.au CDC13 (E:\NMR2011) mgmgrp 38

NMR@CHEM.OX

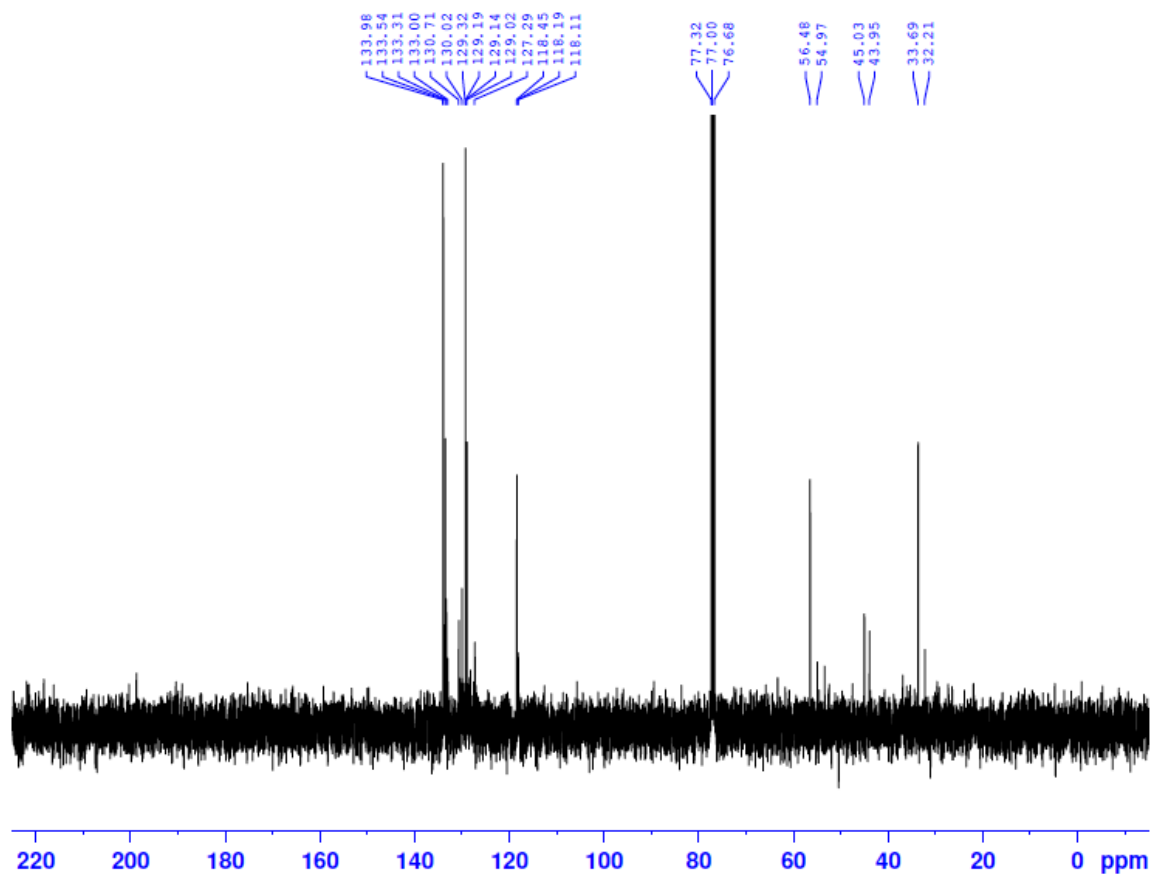

```
NAME      Aug08-2011-38
EXPNO     2
PROCNO    1
Date_     20110808
Time      23.32
INSTRUM   av400
PROBHD    5 mm QNP 1H/13
PULPROG   zgpg30
TD         32768
SOLVENT   CDC13
NS         256
DS         4
SWH       26178.010 Hz
FIDRES    0.798889 Hz
AQ         0.6259188 sec
RG         32768
DW         19.100 usec
DE         7.50 usec
TE         300.0 K
D1         1.00000000 sec
D11        0.03000000 sec
TD0        1

----- CHANNEL f1 -----
NUC1       13C
P1         9.50 usec
PL1        0.00 dB
SFO1       100.6403931 MHz

----- CHANNEL f2 -----
CPDPRG2   waltz16
NUC2       1H
PCPD2     80.00 usec
PL2        0.00 dB
PL12       19.00 dB
PL13       25.00 dB
SFO2       400.2016008 MHz
SI         32768
SF         100.6303718 MHz
WDW        EM
SSB        0
LB         1.00 Hz
GB         0
PC         1.40
```

20b

Instrument DQX400  
Chemist BH  
Group MGM  
bH594

h1acq au CDC13 (E: NMR2011) mgmgr 8

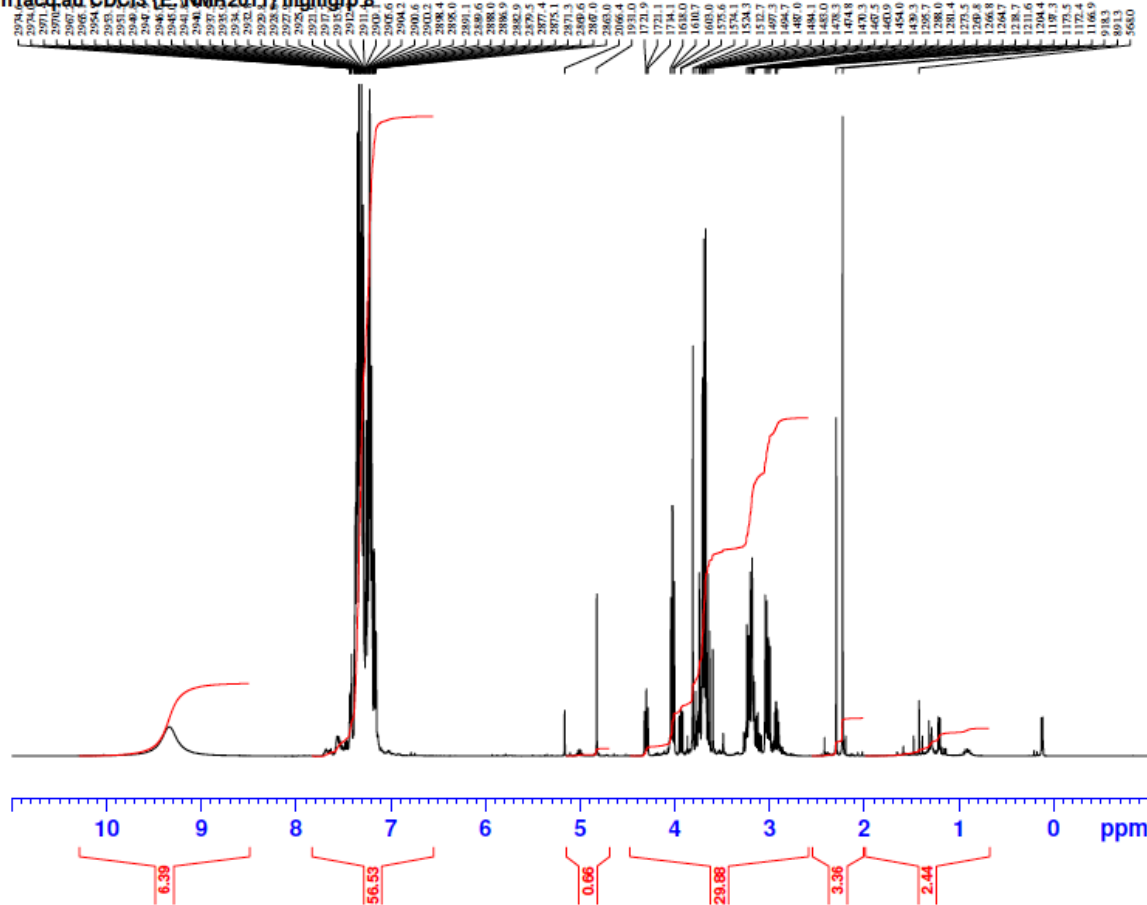

NMR@CHEM.OX

```
NAME Aug04-2011-8
EXPNO 1
PROCNO 1
Date_ 20110804
Time 16.20
INSTRUM av400
PROBHD 5 mm QNP 1H/13
PULPROG zg60
TD 65536
SOLVENT CDC13
NS 16
DS 2
SWH 8278.146 Hz
FIDRES 0.126314 Hz
AQ 3.9584243 sec
RG 40.3
DW 60.400 usec
DE 7.50 usec
TE 300.0 K
D1 1.00000000 sec

----- CHANNEL f1 -----
NUC1 1H
P1 9.00 usec
PL1 0.00 dB
SFO1 400.2024714 MHz
SI 32768
SF 400.2000028 MHz
WDW EM
SSB 0
LB 0.30 Hz
GB 0
PC 1.00
```

20b

Instrument DQX400  
Chemist BH  
Group MGM  
bH594  
c13acq.au CDC13 (E:\NMR2011) mgmgrp 8

NMR@CHEM.OX

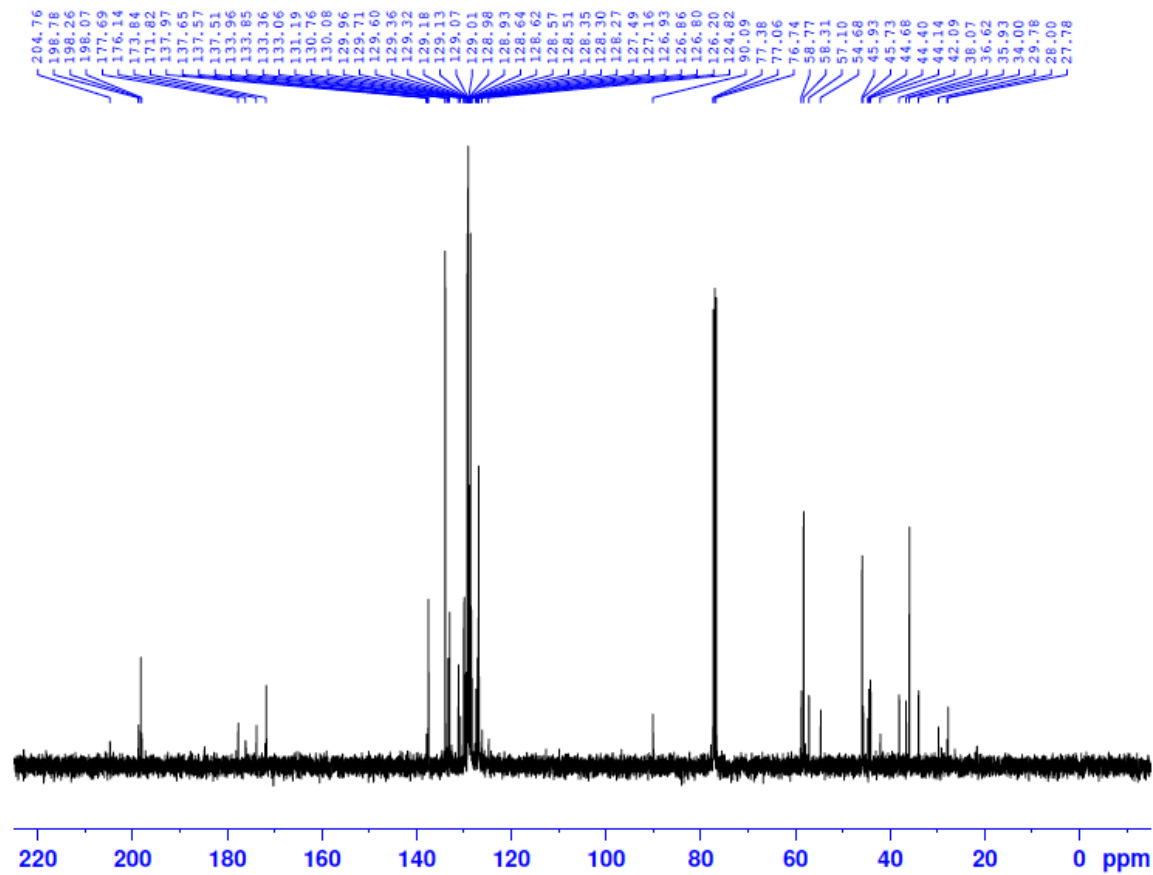

NAME Aug04-2011-8  
EXPNO 2  
PROCNO 1  
Date\_ 20110804  
Time 16.28  
INSTRUM av400  
PROBHD 5 mm QNP 1H/13  
PULPROG zgpg30  
TD 32768  
SOLVENT CDC13  
NS 256  
DS 4  
SWH 26178.010 Hz  
FIDRES 0.798889 Hz  
AQ 0.6259188 sec  
RG 32768  
DW 19.100 usec  
DE 7.50 usec  
TE 300.0 K  
D1 1.00000000 sec  
D11 0.03000000 sec  
TD0 1

----- CHANNEL f1 -----  
NUC1 13C  
P1 9.50 usec  
PL1 0.00 dB  
SFO1 100.6403931 MHz  
  
----- CHANNEL f2 -----  
CPDPRG2 waltz16  
NUC2 1H  
PCPD2 80.00 usec  
PL2 0.00 dB  
PL12 19.00 dB  
PL13 25.00 dB  
SFO2 400.2016008 MHz  
SI 32768  
SF 100.6303718 MHz  
WDW EM  
SSB 0  
LB 1.00 Hz  
GB 0  
PC 1.40

21a

Instrument DQX400  
Chemist BH  
Group MGM  
BH5114 F3

h1acq au CDCl3 (E: NMR2011) mgmgrp 23

NMRCHEM.OX

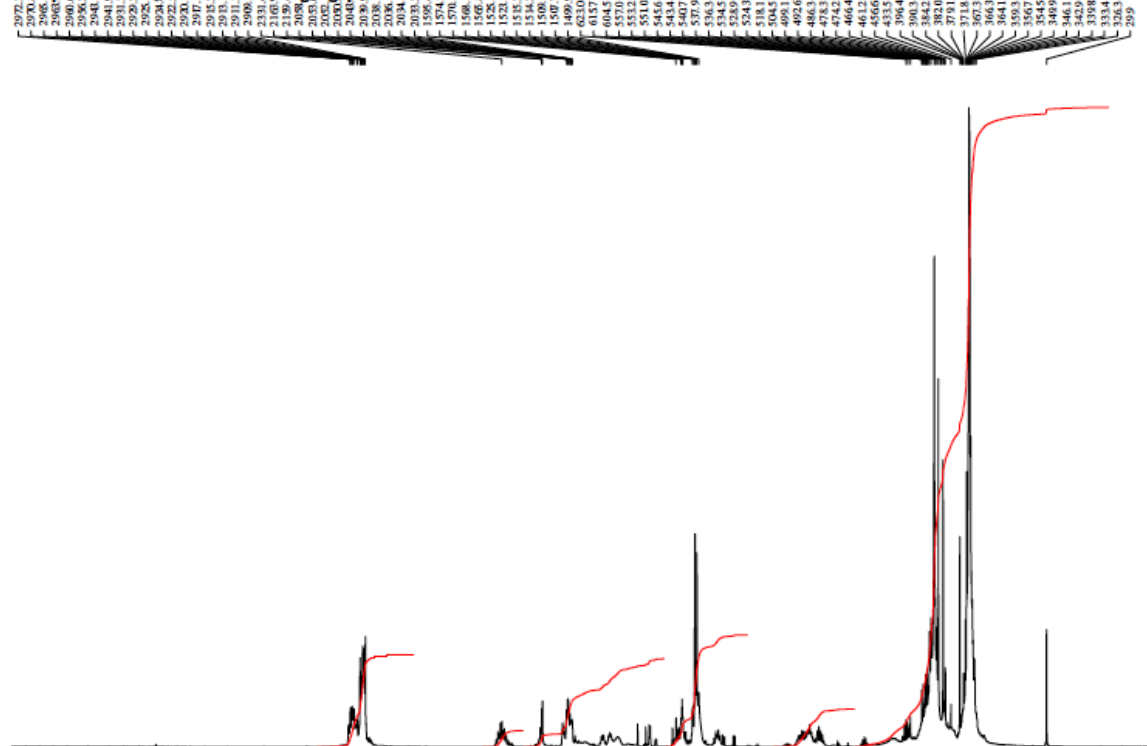

```
NAME Sep16-2011-23
EXPNO 1
PROCNO 1
Date_ 20110917
Time 9.17
INSTRUM av400
PROBHD 5 mm QNP 1H/13
PULPROG zg60
TD 65536
SOLVENT CDCl3
NS 16
DS 2
SWH 8278.146 Hz
FIDRES 0.126314 Hz
AQ 3.9584243 sec
RG 40.3
DW 60.400 usec
DE 7.50 usec
TE 300.0 K
D1 1.00000000 sec

----- CHANNEL f1 -----
NUC1 1H
P1 9.00 usec
PL1 0.00 dB
SFO1 400.2024714 MHz
SI 32768
SF 400.2000028 MHz
WDW EM
SSB 0
LB 0.30 Hz
GB 0
PC 1.00
```

21a

Instrument DQX400  
Chemist BH  
Group MGM  
BH5114 F3  
c13acq.au CDC13 (E:\NMR2011) mgmgrp 23

NMR@CHEM.OX

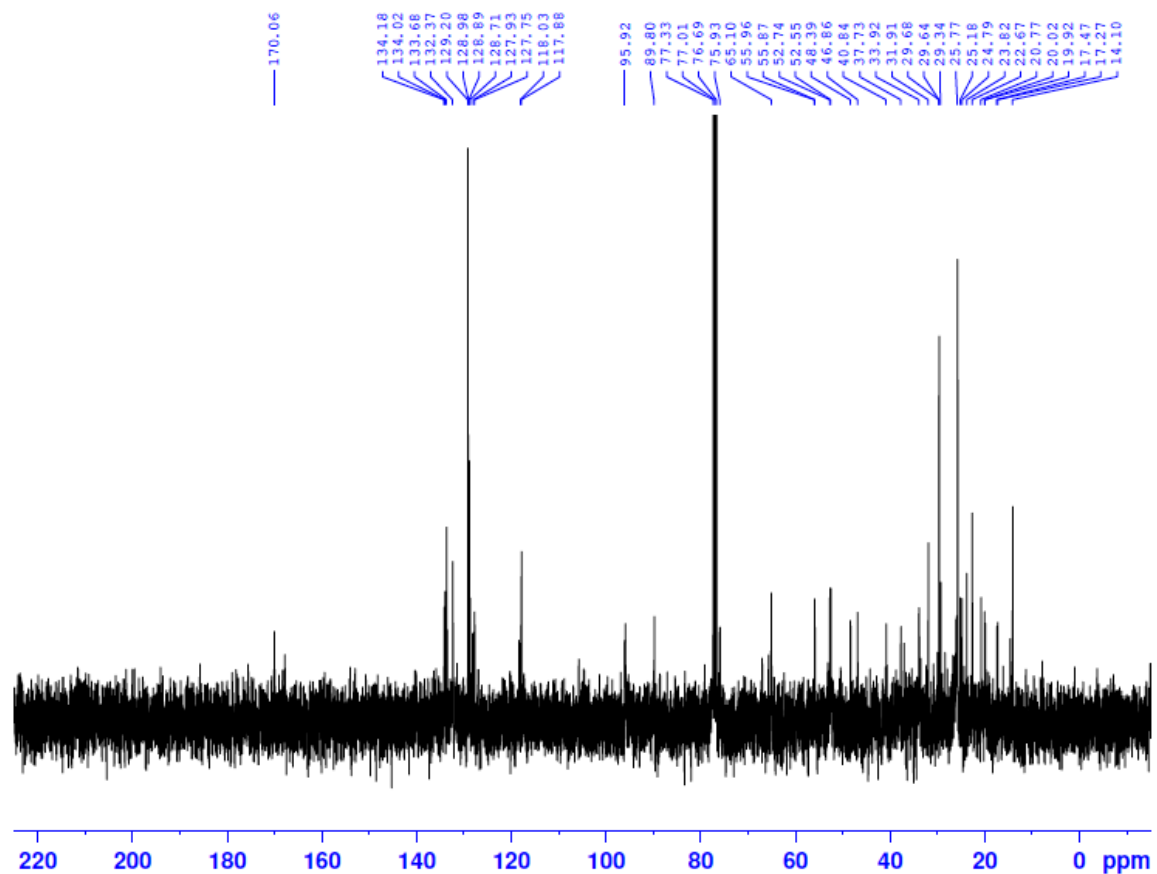

```
NAME Sep16-2011-23
EXPNO 2
PROCNO 1
Date_ 20110917
Time 9.25
INSTRUM av400
PROBHD 5 mm QNP 1H/13
PULPROG zgpg30
TD 32768
SOLVENT CDC13
NS 256
DS 4
SWH 26178.010 Hz
FIDRES 0.798889 Hz
AQ 0.6259188 sec
RG 32768
DW 19.100 usec
DE 7.50 usec
TE 300.0 K
D1 1.00000000 sec
D11 0.03000000 sec
TD0 1

----- CHANNEL f1 -----
NUC1 13C
P1 9.50 usec
PL1 0.00 dB
SFO1 100.6403931 MHz

----- CHANNEL f2 -----
CPDPRG2 waltz16
NUC2 1H
PCPD2 80.00 usec
PL2 0.00 dB
PL12 19.00 dB
PL13 25.00 dB
SFO2 400.2016008 MHz
SI 32768
SF 100.6303718 MHz
WDW EM
SSB 0
LB 1.00 Hz
GB 0
PC 1.40
```

21b

Instrument AVC500  
Group MGM  
BETH HEAVISIDE 6011 20/9/11

NMRO@CHEM.OX

NAME bh60112009  
EXPNO 1  
PROCNO 1  
Date\_ 20110921  
Time 0.58  
INSTRUM avc500  
PROBHD 5 mm CPDUL 13C  
PULPROG zg30  
TD 65536  
SOLVENT CDCl3  
NS 16  
DS 2  
SWH 10330.578 Hz  
FIDRES 0.157632 Hz  
AQ 3.1719923 sec  
RG 4  
DW 48.400 usec  
DE 6.00 usec  
TE 298.0 K  
D1 1.00000000 sec  
TD0 1

----- CHANNEL f1 -----  
NUC1 1H  
P1 9.60 usec  
PL1 -6.00 dB  
PL1W 15.19999981 W  
SFO1 500.3030896 MHz  
SI 32768  
SF 500.3000240 MHz  
WDW EM  
SSB 0  
LB 0.30 Hz  
GB 0  
PC 1.00

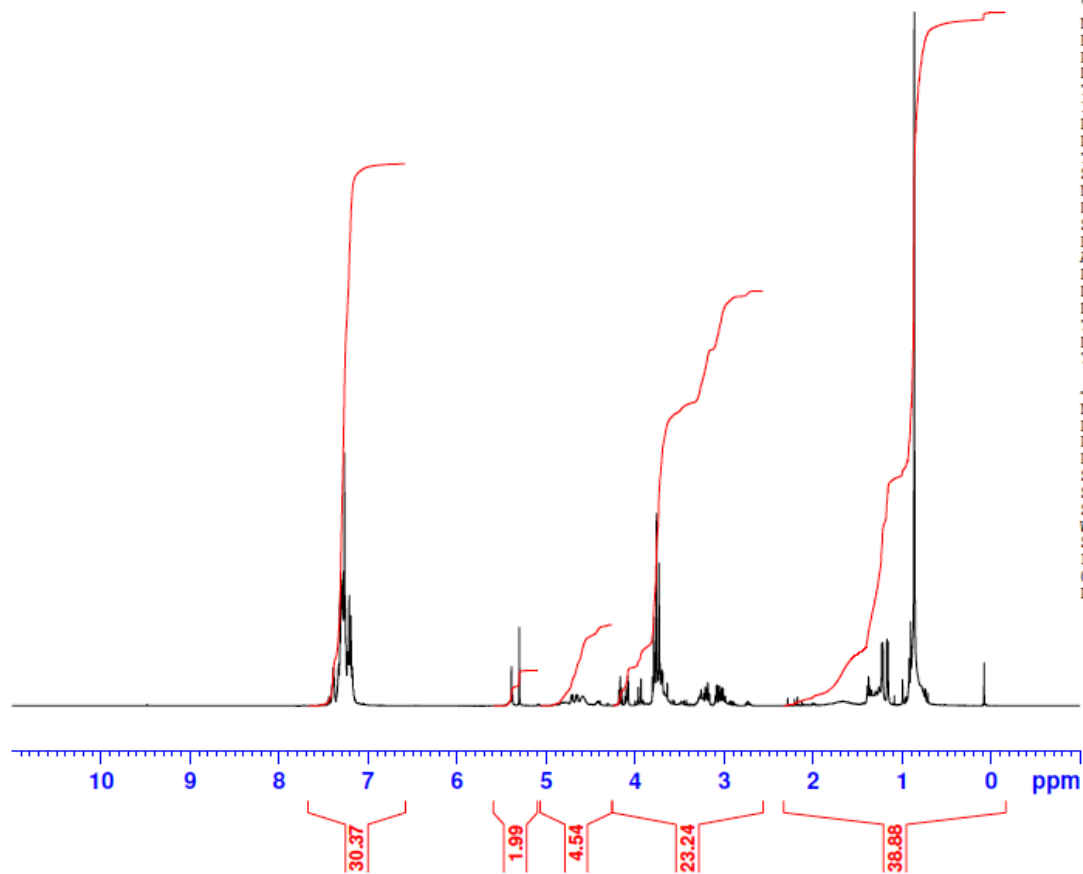

21b

Instrument AVC500  
Group MGM  
BETH HEAVISIDE 6011 20/9/11

NMR@CHEM.OX

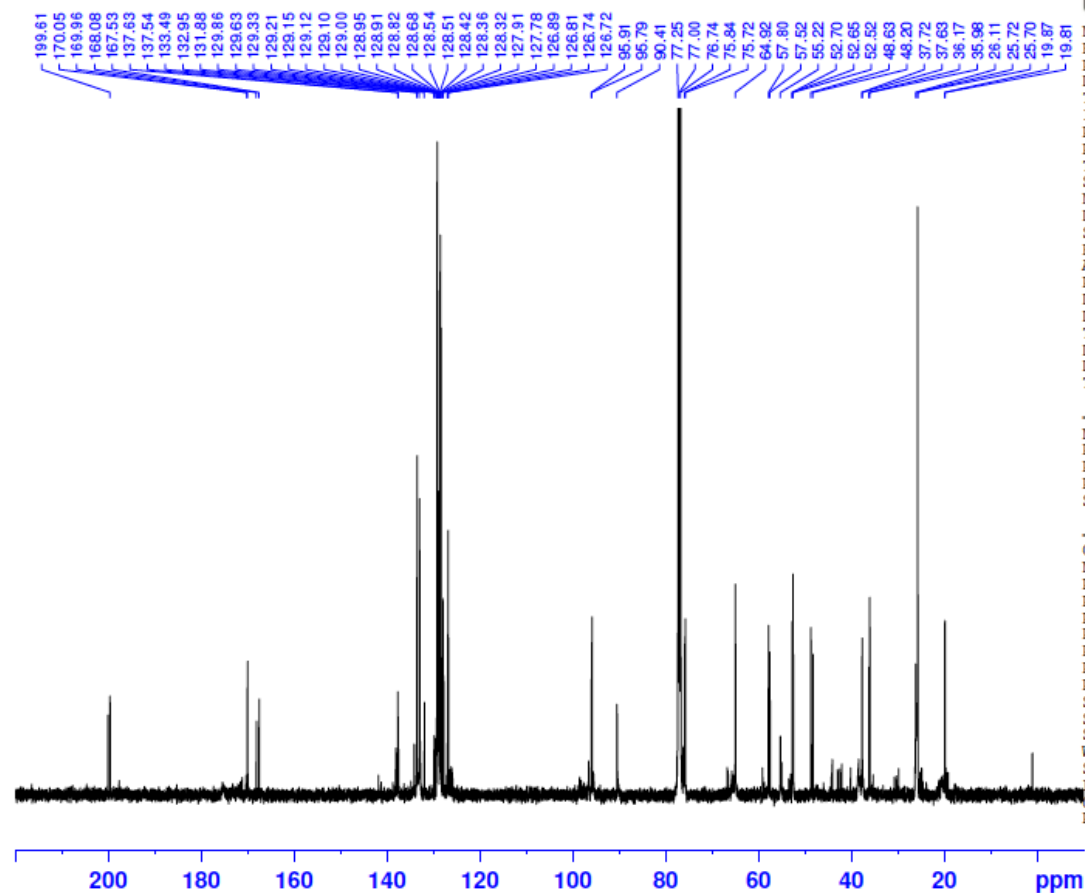

```
NAME          bh60112009
EXPNO          4
PROCNO         1
Date_          20110921
Time           2.09
INSTRUM        avc500
PROBHD         5 mm CPDUL 13C
PULPROG        zgpg30
TD             65536
SOLVENT        CDCl3
NS             1024
DS             2
SWH            31250.000 Hz
FIDRES         0.476837 Hz
AQ             1.0486259 sec
RG             1030
DW             16.000 usec
DE             20.00 usec
TE             298.0 K
D1             2.00000000 sec
D11            0.03000000 sec
TDO           1

----- CHANNEL f1 -----
NUC1           13C
P1             10.00 usec
PL1            -4.40 dB
PL1W           28.15752029 W
SFO1           125.8131151 MHz

----- CHANNEL f2 -----
CPDPRG2        waltz16
NUC2           1H
PCPD2          80.00 usec
PL2            -6.00 dB
PL12           12.42 dB
PL13           18.42 dB
PL2W           15.19999981 W
PL12W          0.21869738 W
PL13W          0.05493430 W
SFO2           500.3020012 MHz
SI             32768
SF             125.8005438 MHz
WDW            EM
SSB            0
LB             1.00 Hz
GB             0
PC             1.40
```



22a

Instrument DQX400  
Chemist BH  
Group MGM  
BH3192 F2+3  
h1acq.au CDCl3 {C:NMR} mgmgrp 28

NMRCHEM.OX

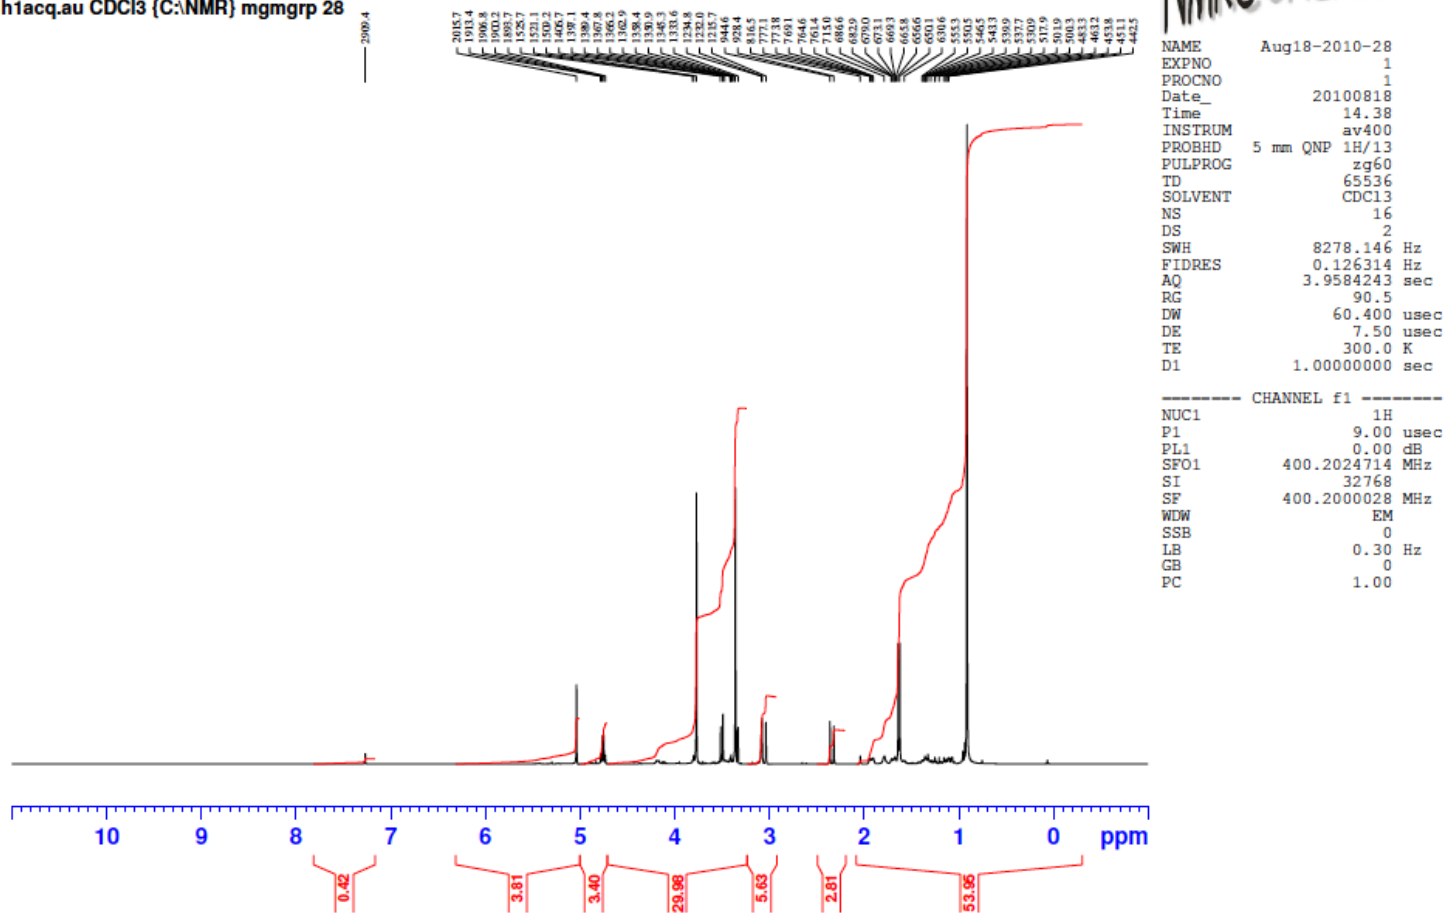

22a

Instrument DQX400  
Chemist BH  
Group MGM  
BH3192 F2+3  
c13acq.au CDCl3 (C:NMR) mgmgrp 28

NMR@CHEM.OX

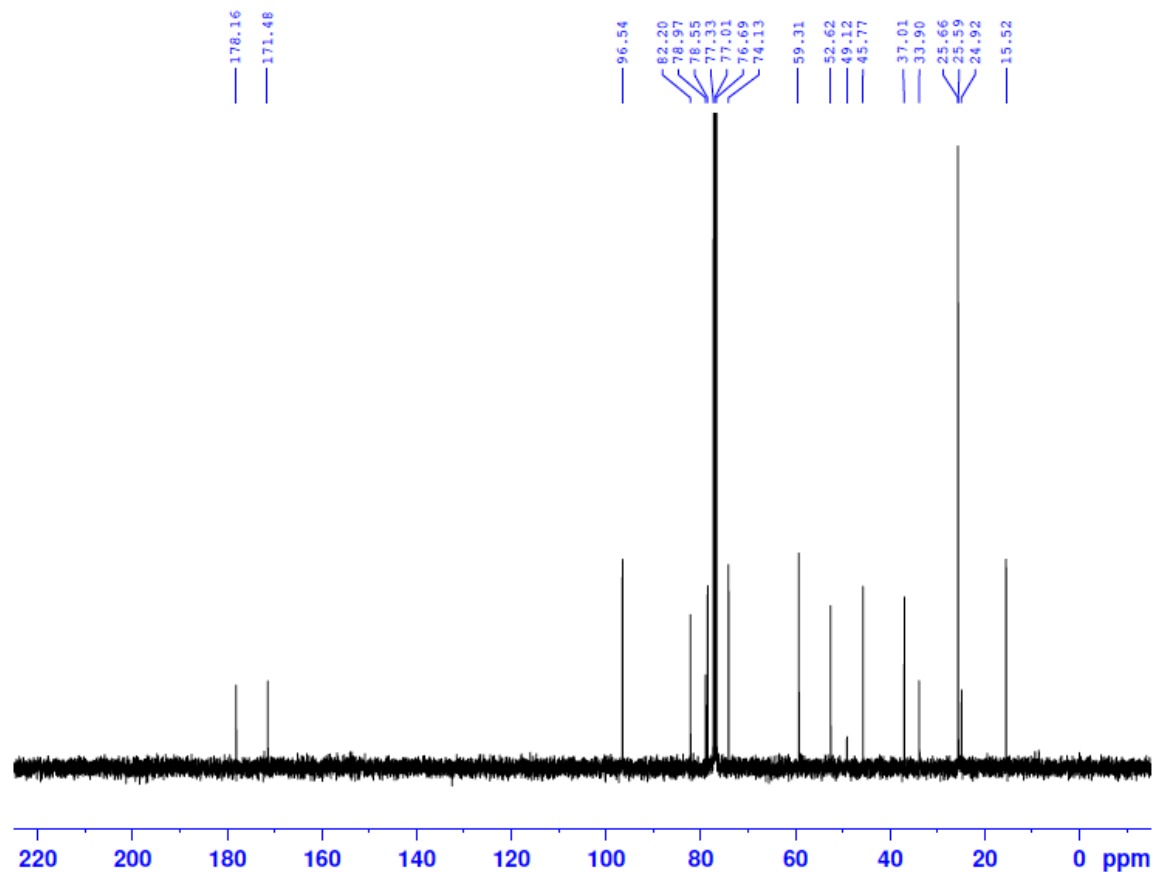

NAME Aug18-2010-28  
EXPNO 2  
PROCNO 1  
Date\_ 20100818  
Time 14.46  
INSTRUM av400  
PROBHD 5 mm QNP 1H/13  
PULPROG zgpg30  
TD 32768  
SOLVENT CDCl3  
NS 256  
DS 4  
SWH 26178.010 Hz  
FIDRES 0.798889 Hz  
AQ 0.6259188 sec  
RG 32768  
DW 19.100 usec  
DE 7.50 usec  
TE 300.0 K  
D1 1.00000000 sec  
D11 0.03000000 sec  
TD0 1

----- CHANNEL f1 -----  
NUC1 13C  
P1 9.50 usec  
PL1 0.00 dB  
SFO1 100.6403931 MHz  
  
----- CHANNEL f2 -----  
CPDPRG2 waltz16  
NUC2 1H  
PCPD2 80.00 usec  
PL2 0.00 dB  
PL12 19.00 dB  
PL13 25.00 dB  
SFO2 400.2016008 MHz  
SI 32768  
SF 100.6303718 MHz  
WDW EM  
SSB 0  
LB 1.00 Hz  
GB 0  
PC 1.40

22b

Instrument DQX400  
Chemist BH  
Group MGM  
BH4108 F2  
h1acc.au CDCl3 (C;NMR) mgmgrp 40

NMR@CHEM.OX

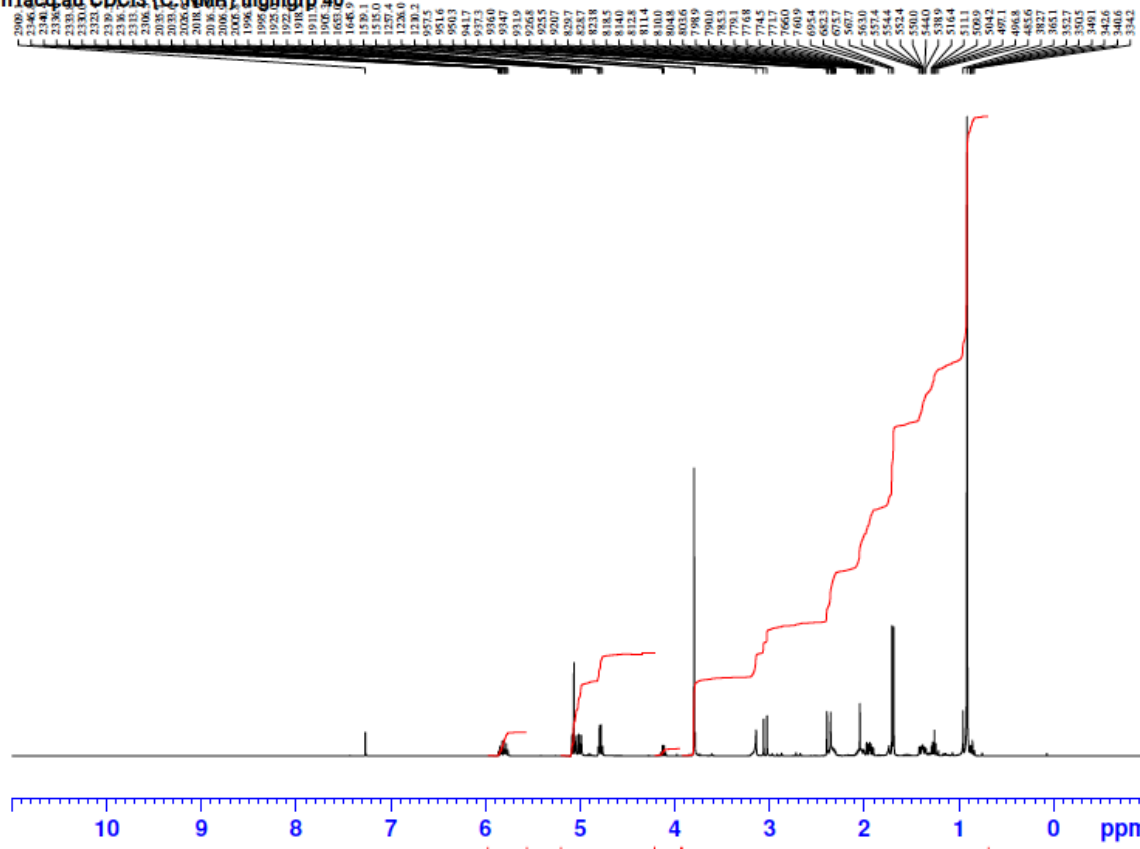

```
NAME      Jan07-2011-40
EXPNO     1
PROCNO    1
Date_     20110108
Time      3.50
INSTRUM   av400
PROBHD    5 mm QNP 1H/13
PULPROG   zg60
TD        65536
SOLVENT   CDCl3
NS        16
DS        2
SWH       8278.146 Hz
FIDRES    0.126314 Hz
AQ        3.9584243 sec
RG        90.5
DW        60.400 usec
DE        7.50 usec
TE        300.0 K
D1        1.00000000 sec

----- CHANNEL f1 -----
NUC1      1H
P1        9.00 usec
PL1       0.00 dB
SFO1     400.2024714 MHz
SI        32768
SF        400.2000028 MHz
WDW       EM
SSB       0
LB        0.30 Hz
GB        0
PC        1.00
```

22b

Instrument DQX400  
Chemist BH  
Group MGM  
BH4108 F2  
c13acq.au CDCl3 (C:NMR) mgmgrp 40

NMR@CHEM.OX

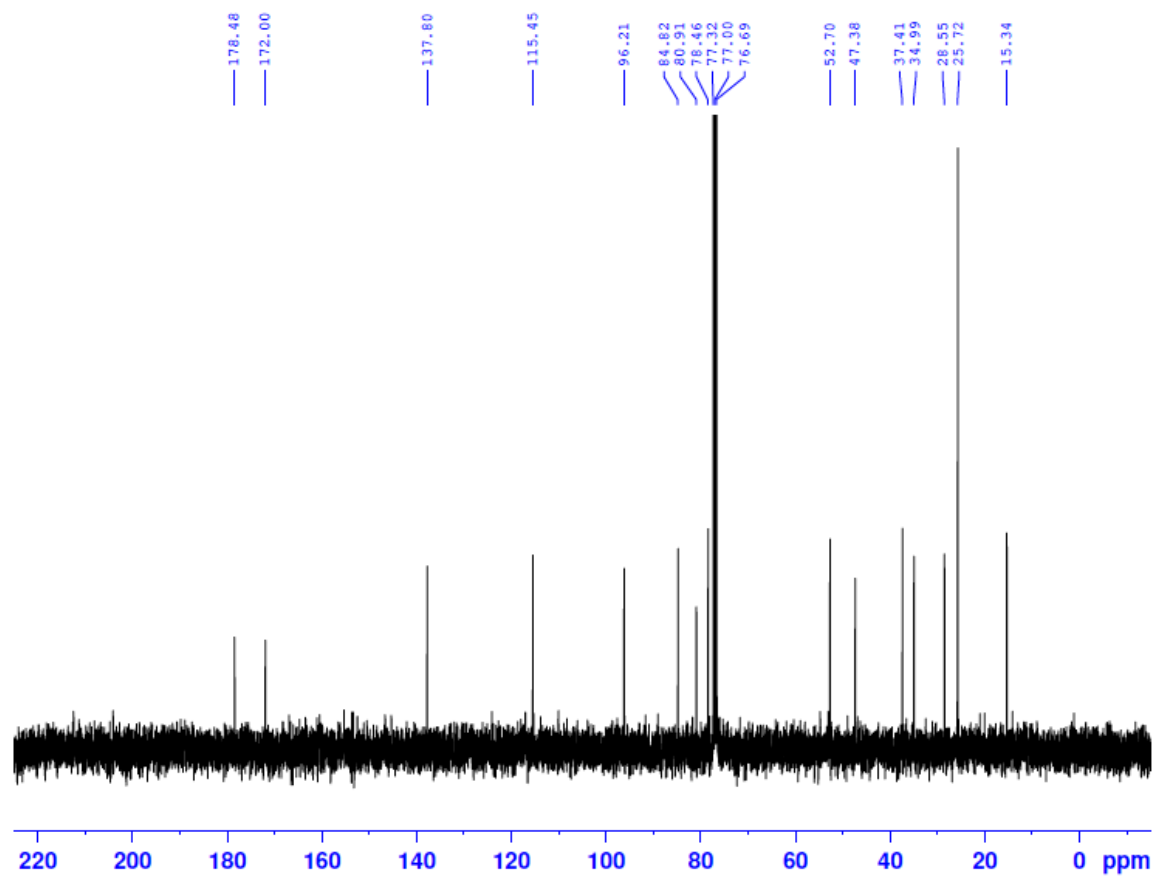

NAME Jan07-2011-40  
EXPNO 2  
PROCNO 1  
Date\_ 20110108  
Time 3.58  
INSTRUM av400  
PROBHD 5 mm QNP 1H/13  
PULPROG zgpg30  
TD 32768  
SOLVENT CDCl3  
NS 256  
DS 4  
SWH 26178.010 Hz  
FIDRES 0.798889 Hz  
AQ 0.6259188 sec  
RG 32768  
DW 19.100 usec  
DE 7.50 usec  
TE 300.0 K  
D1 1.00000000 sec  
D11 0.03000000 sec  
TD0 1

----- CHANNEL f1 -----  
NUC1 13C  
P1 9.50 usec  
PL1 0.00 dB  
SFO1 100.6403931 MHz

----- CHANNEL f2 -----  
CPDPRG2 waltz16  
NUC2 1H  
PCPD2 80.00 usec  
PL2 0.00 dB  
PL12 19.00 dB  
PL13 25.00 dB  
SFO2 400.2016008 MHz  
SI 32768  
SF 100.6303718 MHz  
WDW EM  
SSB 0  
LB 1.00 Hz  
GB 0  
PC 1.40

22c

Instrument DQX400  
Chemist BH  
Group MGM  
BH4154 F2  
h1acq.au CDC13 (E:\NMR2011) mgmgrp 21

NMRCHEM.OX

2095  
2096  
2097  
2098  
2099  
2100  
2101  
2102  
2103  
2104  
2105  
2106  
2107  
2108  
2109  
2110  
2111  
2112  
2113  
2114  
2115  
2116  
2117  
2118  
2119  
2120  
2121  
2122  
2123  
2124  
2125  
2126  
2127  
2128  
2129  
2130  
2131  
2132  
2133  
2134  
2135  
2136  
2137  
2138  
2139  
2140  
2141  
2142  
2143  
2144  
2145  
2146  
2147  
2148  
2149  
2150  
2151  
2152  
2153  
2154  
2155  
2156  
2157  
2158  
2159  
2160  
2161  
2162  
2163  
2164  
2165  
2166  
2167  
2168  
2169  
2170  
2171  
2172  
2173  
2174  
2175  
2176  
2177  
2178  
2179  
2180  
2181  
2182  
2183  
2184  
2185  
2186  
2187  
2188  
2189  
2190  
2191  
2192  
2193  
2194  
2195  
2196  
2197  
2198  
2199  
2200

```
NAME Feb25-2011-21
EXPNO 1
PROCNO 1
Date_ 20110226
Time 1.34
INSTRUM av400
PROBHD 5 mm QNP 1H/13
PULPROG zg60
TD 65536
SOLVENT CDC13
NS 16
DS 2
SWH 8278.146 Hz
FIDRES 0.126314 Hz
AQ 3.9584243 sec
RG 90.5
DW 60.400 usec
DE 7.50 usec
TE 300.0 K
D1 1.00000000 sec

----- CHANNEL f1 -----
NUC1 1H
P1 9.00 usec
PL1 0.00 dB
SFO1 400.2024714 MHz
SI 32768
SF 400.2000028 MHz
WDW EM
SSB 0
LB 0.30 Hz
GB 0
PC 1.00
```

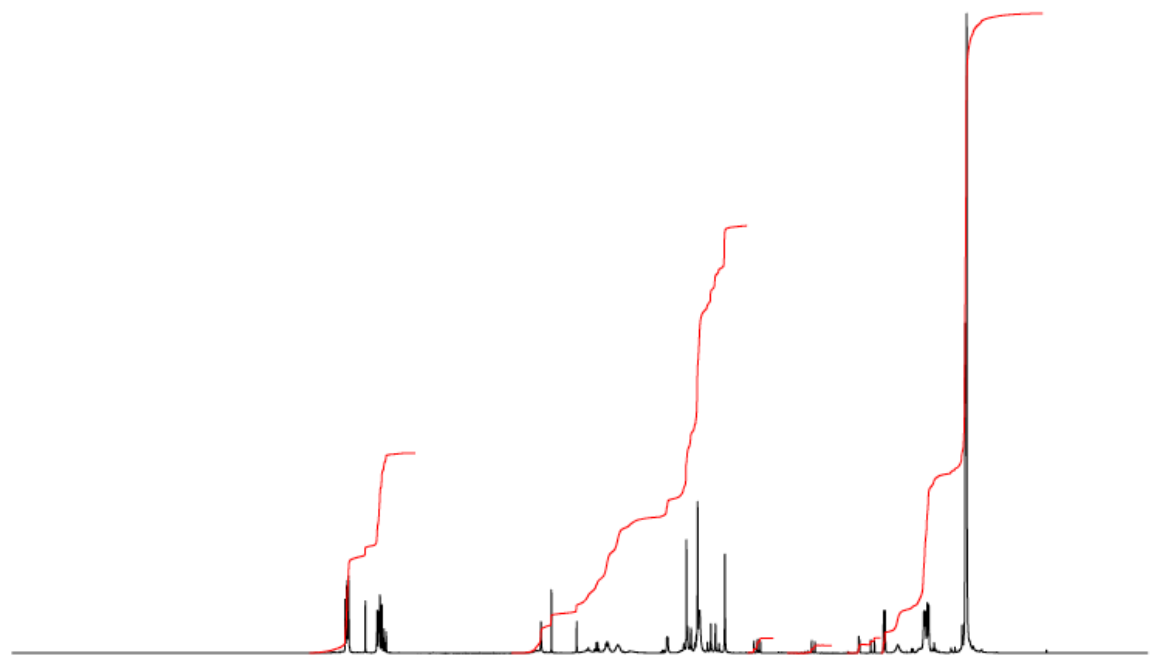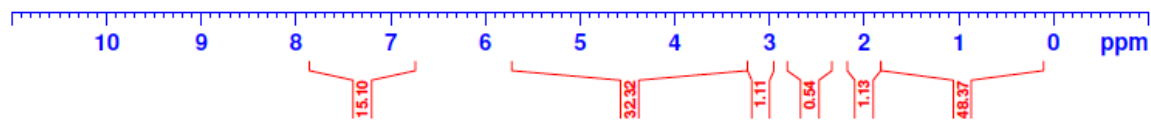

22c

Instrument DQX400  
Chemist BH  
Group MGM  
BH4154 F2  
c13acq.au CDC13 (E:\NMR2011) mgmgrp 21

NMR@CHEM.OX

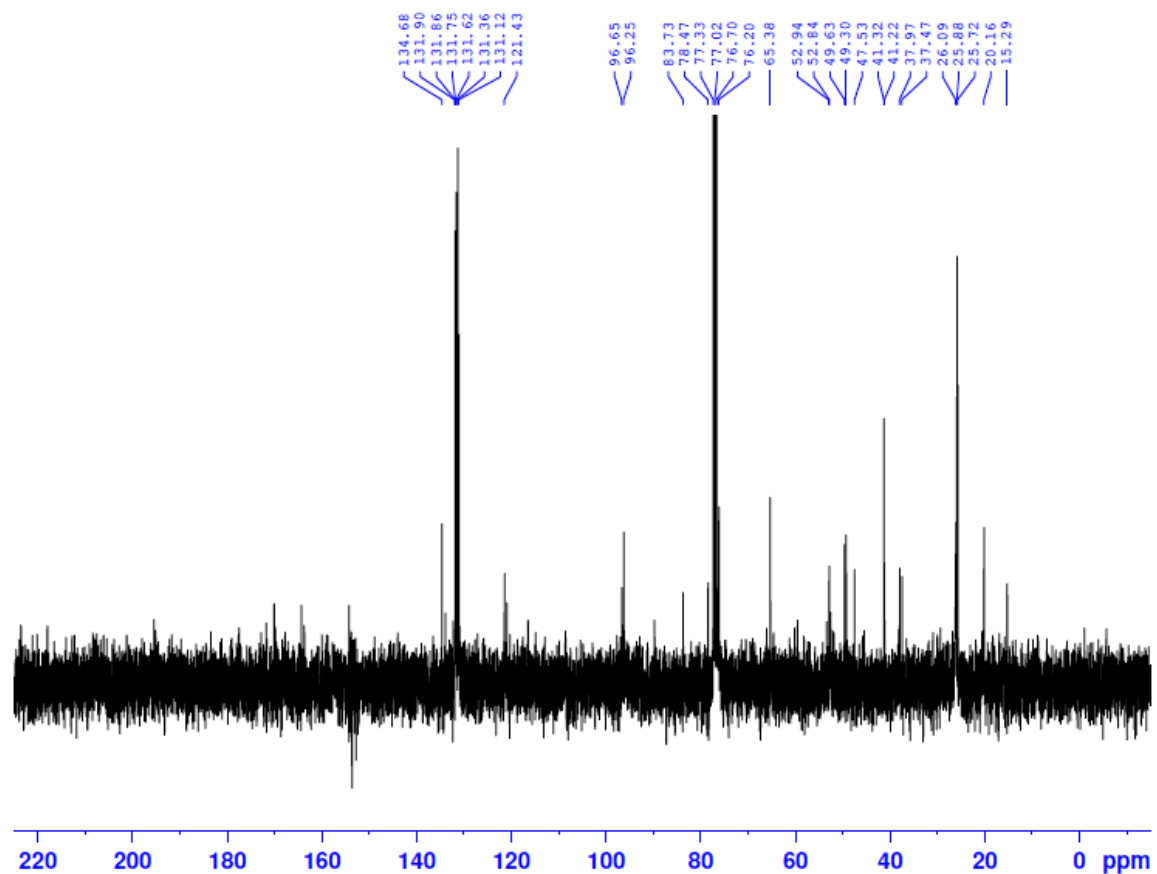

```
NAME Feb25-2011-21
EXPNO 2
PROCNO 1
Date_ 20110226
Time 1.42
INSTRUM av400
PROBHD 5 mm QNP 1H/13
PULPROG zgpg30
TD 32768
SOLVENT CDC13
NS 256
DS 4
SWH 26178.010 Hz
FIDRES 0.798889 Hz
AQ 0.6259188 sec
RG 32768
DW 19.100 usec
DE 7.50 usec
TE 300.0 K
D1 1.00000000 sec
D11 0.03000000 sec
TD0 1

----- CHANNEL f1 -----
NUC1 13C
P1 9.50 usec
PL1 0.00 dB
SFO1 100.6403931 MHz

----- CHANNEL f2 -----
CPDPRG2 waltz16
NUC2 1H
PCPD2 80.00 usec
PL2 0.00 dB
PL12 19.00 dB
PL13 25.00 dB
SFO2 400.2016008 MHz
SI 32768
SF 100.6303718 MHz
WDW EM
SSB 0
LB 1.00 Hz
GB 0
PC 1.40
```

22d

Instrument DQX400  
Chemist BH  
Group MGM  
BH4172 F2  
h1acq.au CDCl3 {E:NMB2Q11} mgmgrp\_3

NMR@CHEM.OX

2972.52  
2966  
2965.8  
2965.8  
2965.8  
2955  
2955  
2955  
2922  
2922  
2922  
2914.7  
2914.7  
2914.7  
2905.2  
2905.2  
2904.7  
2904.7  
2903.7  
2903.7  
2897.4  
2897.4  
2894.8  
2894.8  
2891.2  
2891.2  
2891.1  
2131.1  
2021.3  
1956.1  
1956.1  
1949.9  
1949.4  
1897.8  
1897.8  
1891.3  
1529.4  
1529.4  
1514.2  
1514.2  
1463.9  
1463.9  
1434.2  
1434.2  
1430.6  
1430.6  
1421.0  
1421.0  
1338.4  
1338.4  
1335.7  
1335.7  
1326.6  
1326.6  
1200.1  
1200.1  
1162.1  
1162.1  
1157.3  
1157.3  
1146.3  
1146.3  
939.0  
939.0  
923.2  
871.5  
871.5  
871.5  
871.5  
833.5  
833.5  
5269  
5269  
510.3  
510.3  
503.1  
503.1  
384.2  
384.2  
372.7  
361.5  
29.4

```
NAME Mar08-2011-3
EXPNO 1
PROCNO 1
Date_ 20110309
Time 10.16
INSTRUM av400
PROBHD 5 mm QNP 1H/13
PULPROG zg60
TD 65536
SOLVENT CDCl3
NS 16
DS 2
SWH 8278.146 Hz
FIDRES 0.126314 Hz
AQ 3.9584243 sec
RG 45.3
DW 60.400 usec
DE 7.50 usec
TE 300.0 K
D1 1.00000000 sec

----- CHANNEL f1 -----
NUC1 1H
P1 9.00 usec
PL1 0.00 dB
SFO1 400.2024714 MHz
SI 32768
SF 400.2000028 MHz
WDW EM
SSB 0
LB 0.30 Hz
GB 0
PC 1.00
```

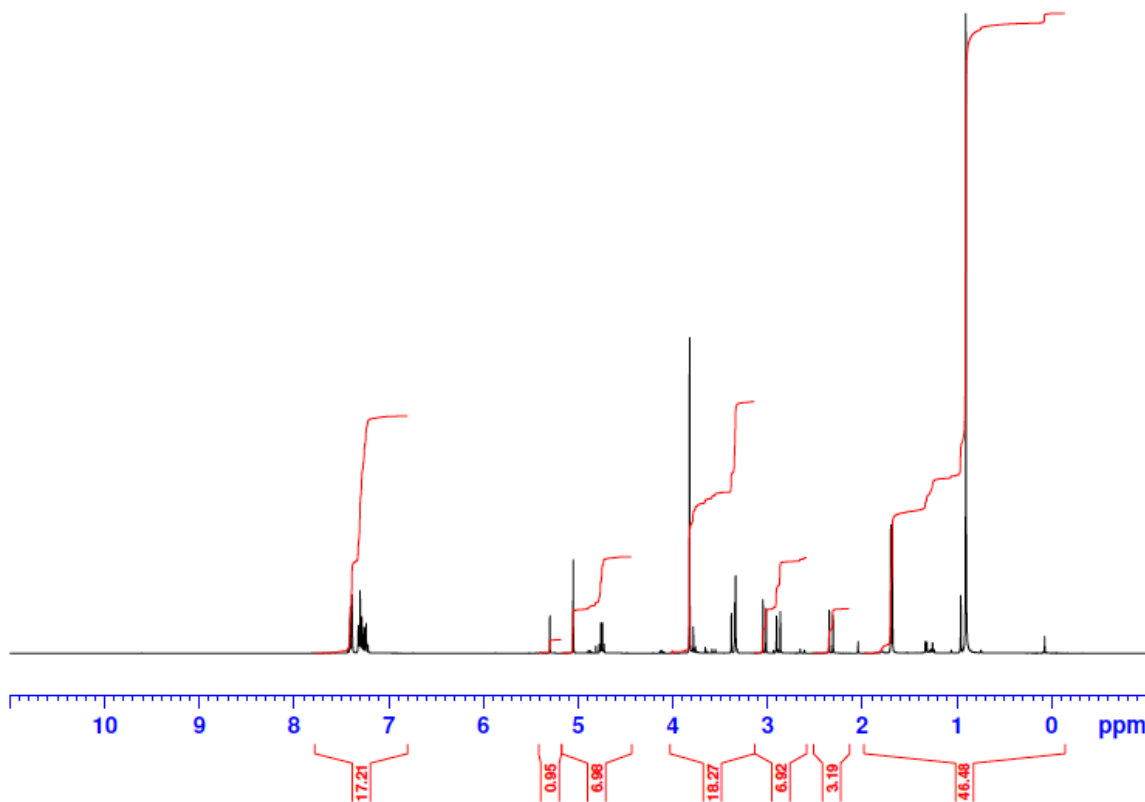

22d

Instrument DQX400  
Chemist BH  
Group MGM  
BH4172 F2  
c13acq.au CDC13 (E:\NMR2011) mgmgrp 3

NMR@CHEM.OX

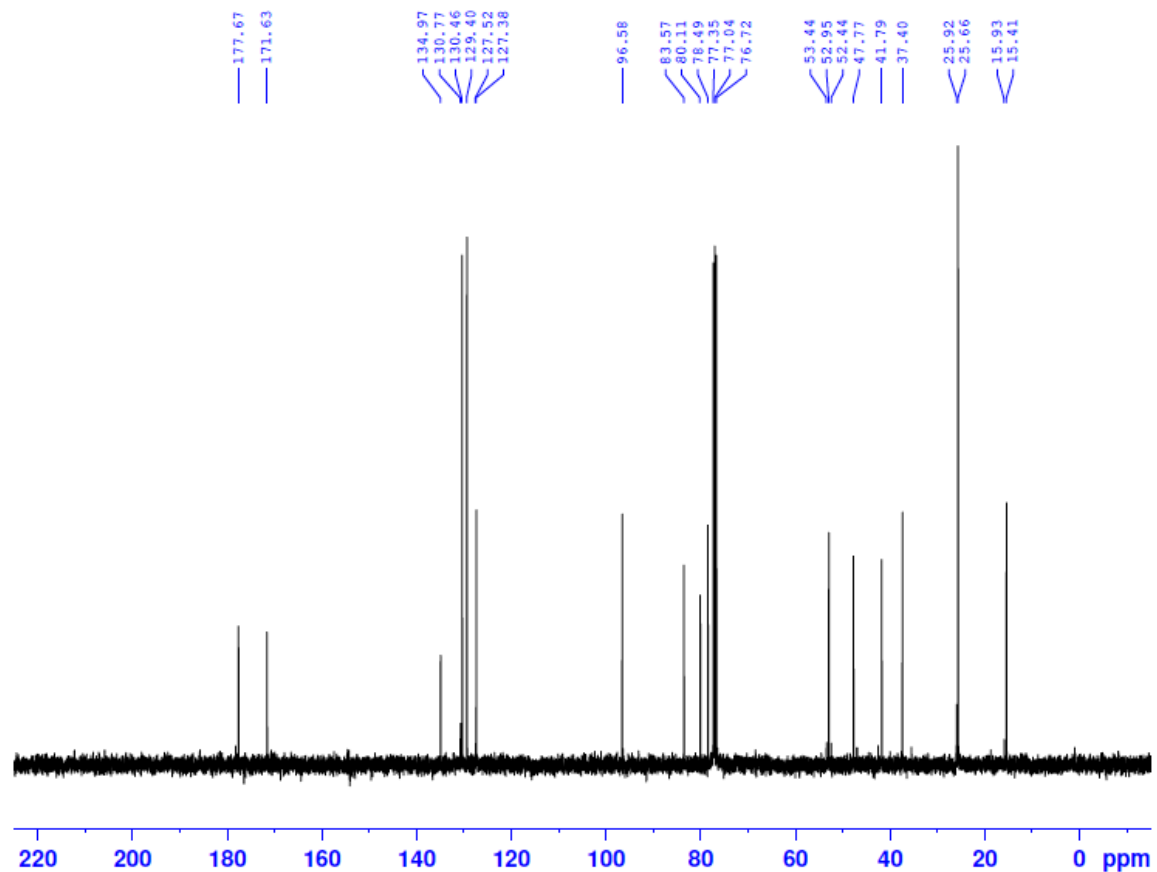

```
NAME Mar08-2011-3
EXPNO 2
PROCNO 1
Date_ 20110309
Time 10.24
INSTRUM av400
PROBHD 5 mm QNP 1H/13
PULPROG zgpg30
TD 32768
SOLVENT CDC13
NS 256
DS 4
SWH 26178.010 Hz
FIDRES 0.798889 Hz
AQ 0.6259188 sec
RG 32768
DW 19.100 usec
DE 7.50 usec
TE 300.0 K
D1 1.00000000 sec
D11 0.03000000 sec
TD0 1

----- CHANNEL f1 -----
NUC1 13C
P1 9.50 usec
PL1 0.00 dB
SFO1 100.6403931 MHz

----- CHANNEL f2 -----
CPDPRG2 waltz16
NUC2 1H
PCPD2 80.00 usec
PL2 0.00 dB
PL12 19.00 dB
PL13 25.00 dB
SFO2 400.2016008 MHz
SI 32768
SF 100.6303718 MHz
WDW EM
SSB 0
LB 1.00 Hz
GB 0
PC 1.40
```



22e

Instrument AVC500  
Group MGM  
0944 Beth Heaviside 13/10/10

NMRO@CHEM.OX

NAME bh09441310  
EXPNO 1  
PROCNO 1  
Date\_ 20101013  
Time 16.20  
INSTRUM avc500  
PROBHD 5 mm CPDUL 13C  
PULPROG zg30  
TD 65536  
SOLVENT CDCl3  
NS 16  
DS 2  
SWH 10330.578 Hz  
FIDRES 0.157632 Hz  
AQ 3.1719923 sec  
RG 4  
DW 48.400 usec  
DE 6.00 usec  
TE 298.0 K  
D1 1.00000000 sec  
TD0 1

----- CHANNEL f1 -----  
NUC1 1H  
P1 9.60 usec  
PL1 -6.00 dB  
PL1W 15.19999981 W  
SFO1 500.3030896 MHz  
SI 32768  
SF 500.3000240 MHz  
WDW EM  
SSB 0  
LB 0.30 Hz  
GB 0  
PC 1.00

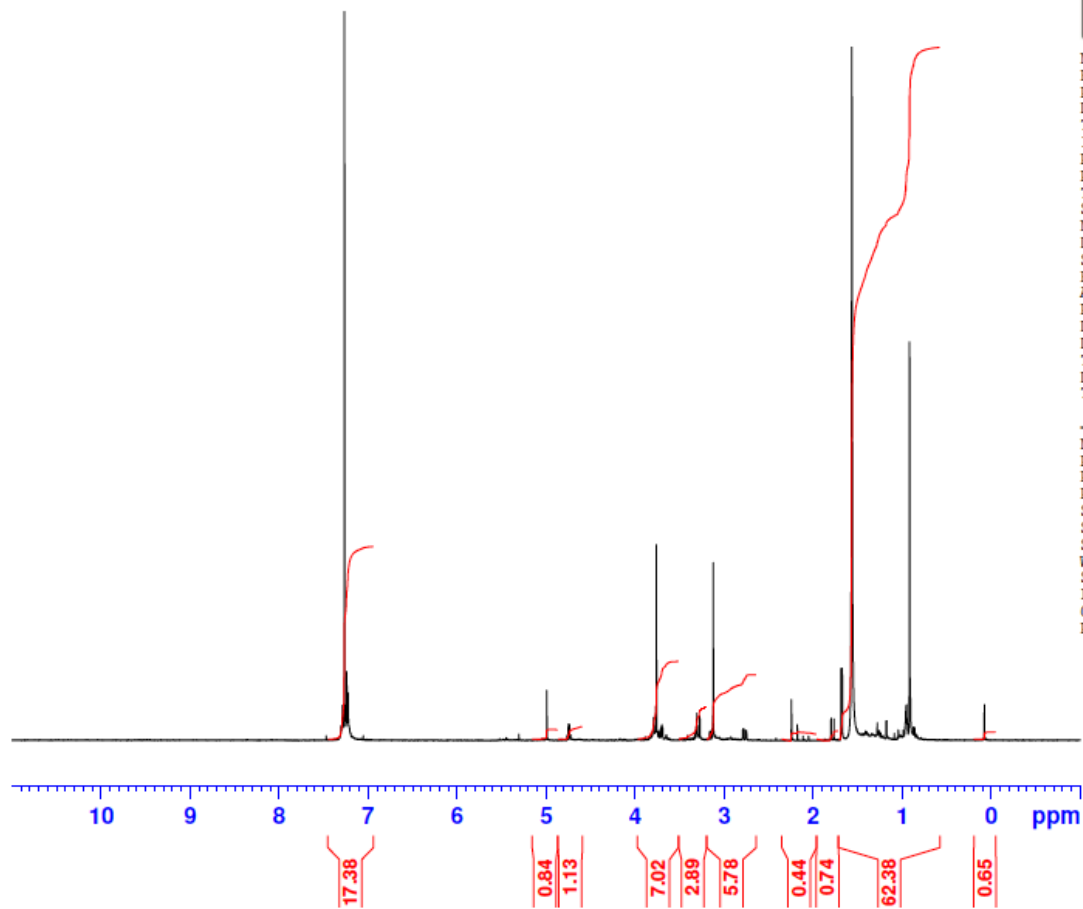

22e

Instrument AVC500  
Group MGM  
0944 Beth Heaviside 13/10/10

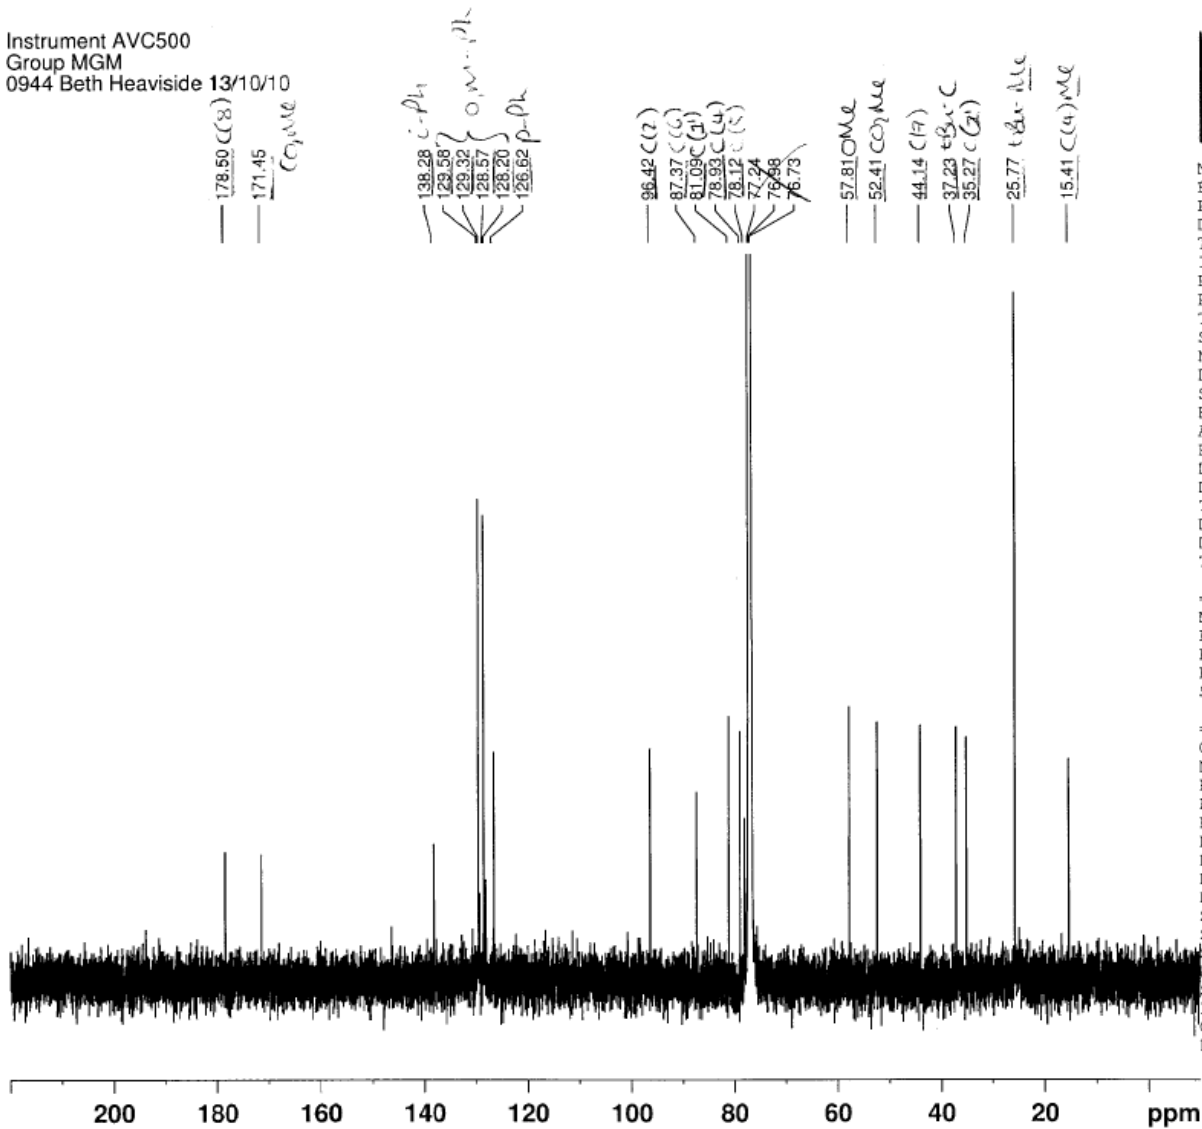

NMR@CHEM.OX

```

NAME          bh09441310
EXPNO         4
PROCNO        1
Date_         20101013
Time          18.52
INSTRUM       avc500
PROBHD        5 mm CPDUL 13C
PULPROG       zgpg30
TD            65536
SOLVENT       CDC13
NS            2048
DS            2
SWH           31250.000 Hz
FIDRES        0.476837 Hz
AQ            1.0486259 sec
RG            1820
DW            16.000 usec
DE            20.00 usec
TE            298.0 K
D1            2.00000000 sec
D11           0.03000000 sec
TD0           1
  
```

```

===== CHANNEL f1 =====
NUC1          13C
P1            9.50 usec
PL1           -4.40 dB
PL1W          28.15752029 W
SFO1          125.8131151 MHz
  
```

```

===== CHANNEL f2 =====
CPDPRG2       waltz16
NUC2          1H
PCPD2         80.00 usec
PL2           -6.00 dB
PL12          12.42 dB
PL13          18.42 dB
PL2W          15.19999981 W
PL12W         0.21869738 W
PL13W         0.05493430 W
SFO2          500.3020012 MHz
SI            32768
SF            125.8005438 MHz
WDW           EM
SSB           0
LB            1.00 Hz
GB            0
PC            1.40
  
```

Instrument DQX400  
 Chemist BH  
 Group MGM  
 BH3176 F3  
 h1acq.au CDCl3 {C:NMR} mgmgrp 20

NMRCHEM.OX

2009.5

2052.4  
1892.2  
1891.6  
1885.1  
1878.4  
1528.6  
1511.6  
1504.0  
1400.3  
1371.8  
1371.5  
1362.8  
1362.9  
1366.8  
1366.9  
1340.0  
1333.9  
1327.1  
1287.2  
1271.0  
1265.9  
1013.3  
815.5  
668.1  
668.1  
581.3  
579.8  
572.7  
559.9  
559.9  
553.3  
548.9  
507.7  
497.8  
494.1  
491.3  
489.0  
425.1  
418.0  
388.1  
371.2  
366.2  
363.3  
354.7  
341.5  
341.5

```

NAME      Aug12-2010-20
EXPNO     1
PROCNO    1
Date_     20100812
Time      18.01
INSTRUM   av400
PROBHD    5 mm QNP 1H/13
PULPROG   zg60
TD         65536
SOLVENT   CDCl3
NS         16
DS         2
SWH       8278.146 Hz
FIDRES    0.126314 Hz
AQ         3.9584243 sec
RG         90.5
DW         60.400 usec
DE         7.50 usec
TE         300.0 K
D1         1.00000000 sec

----- CHANNEL f1 -----
NUC1       1H
P1         9.00 usec
PL1        0.00 dB
SFO1       400.2024714 MHz
SI         32768
SF         400.2000028 MHz
WDW        EM
SSB        0
LB         0.30 Hz
GB         0
PC         1.00
  
```

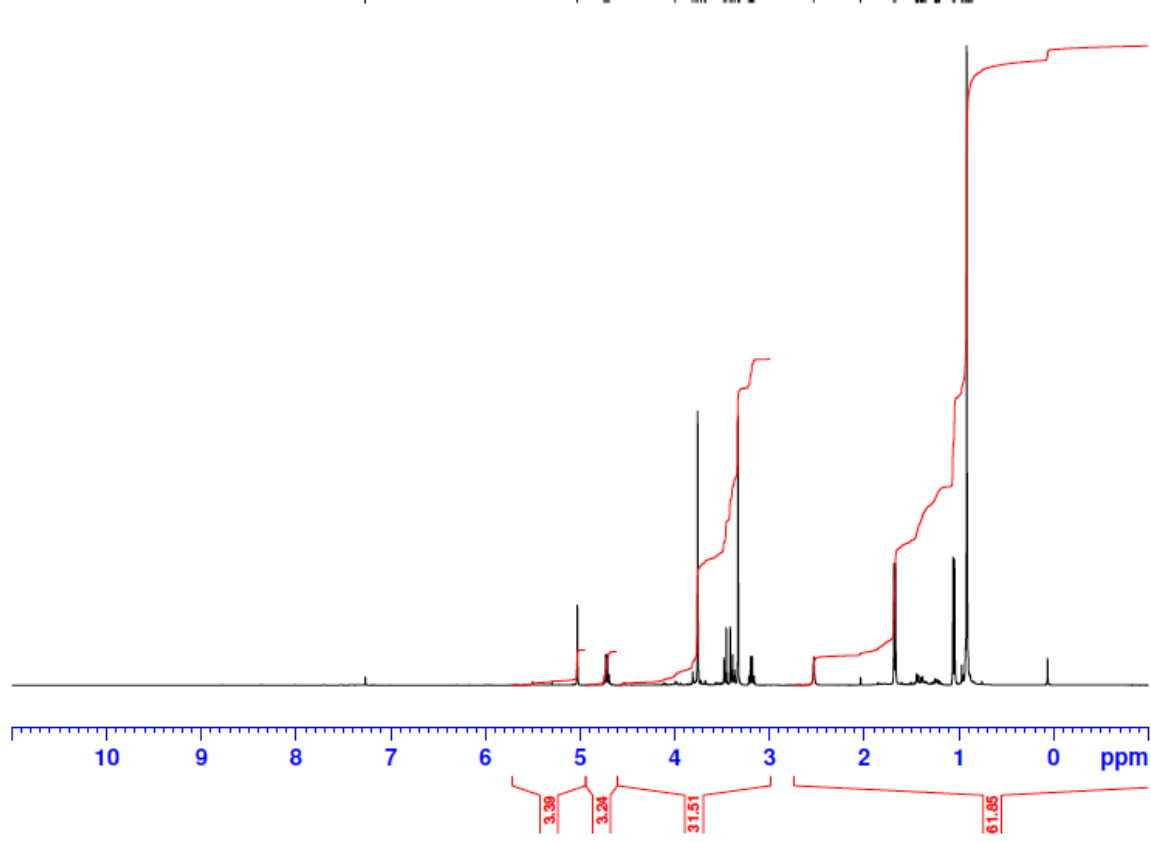

22f

Instrument DQX400  
 Chemist BH  
 Group MGM  
 BH3176 F3  
 c13acq.au CDCl3 (C:NMR) mgmgrp 20

NMR@CHEM.OX

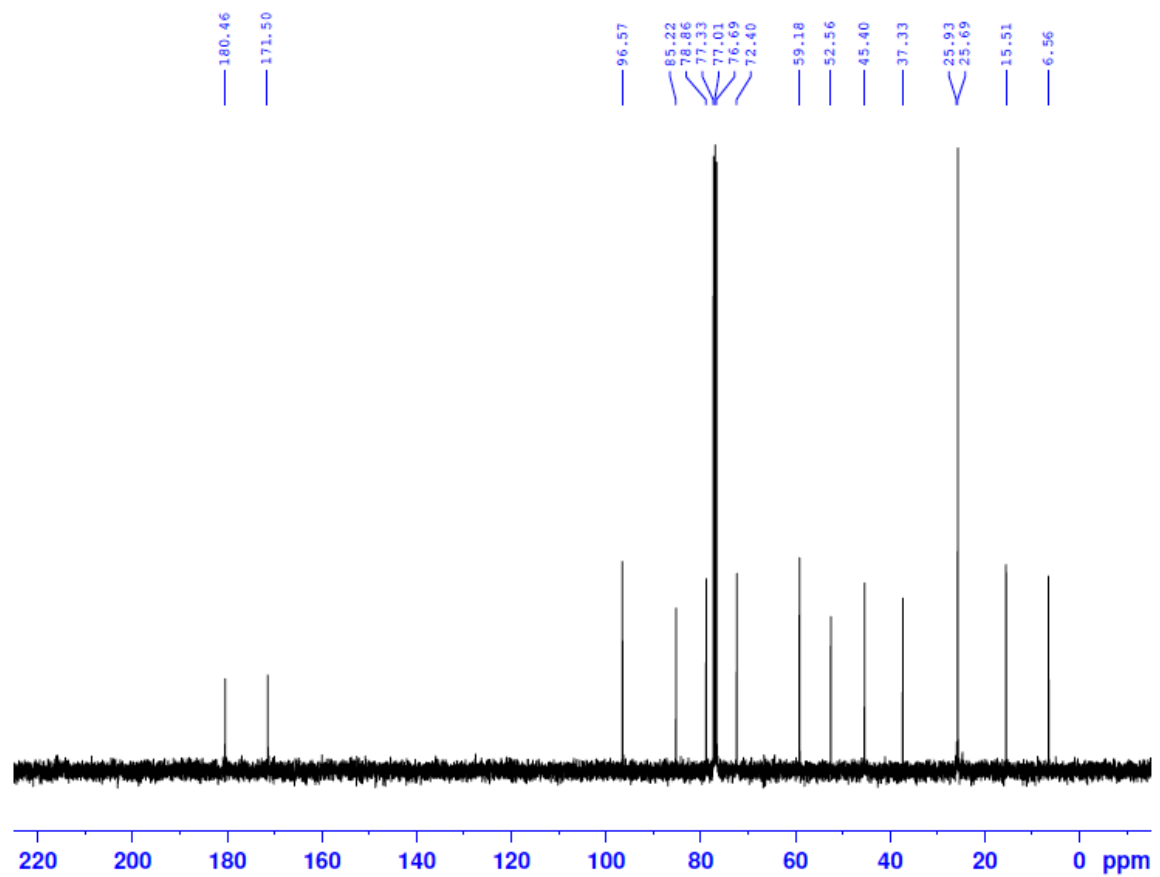

NAME Aug12-2010-20  
 EXPNO 2  
 PROCNO 1  
 Date\_ 20100812  
 Time 18.08  
 INSTRUM av400  
 PROBHD 5 mm QNP 1H/13  
 PULPROG zgpg30  
 TD 32768  
 SOLVENT CDCl3  
 NS 256  
 DS 4  
 SWH 26178.010 Hz  
 FIDRES 0.798889 Hz  
 AQ 0.6259188 sec  
 RG 32768  
 DW 19.100 usec  
 DE 7.50 usec  
 TE 300.0 K  
 D1 1.00000000 sec  
 D11 0.03000000 sec  
 TDO 1

----- CHANNEL f1 -----  
 NUC1 13C  
 P1 9.50 usec  
 PL1 0.00 dB  
 SFO1 100.6403931 MHz

----- CHANNEL f2 -----  
 CPDPRG2 waltz16  
 NUC2 1H  
 PCPD2 80.00 usec  
 PL2 0.00 dB  
 PL12 19.00 dB  
 PL13 25.00 dB  
 SFO2 400.2016008 MHz  
 SI 32768  
 SF 100.6303718 MHz  
 WDW EM  
 SSB 0  
 LB 1.00 Hz  
 GB 0  
 PC 1.40

22g

Instrument DQX400  
Chemist BH  
Group MGM  
BH4188 F2 (+3)  
h1acq.au CDCl3 {E:NMR2011} mgmgrp 29

NMR@CHEM.OX

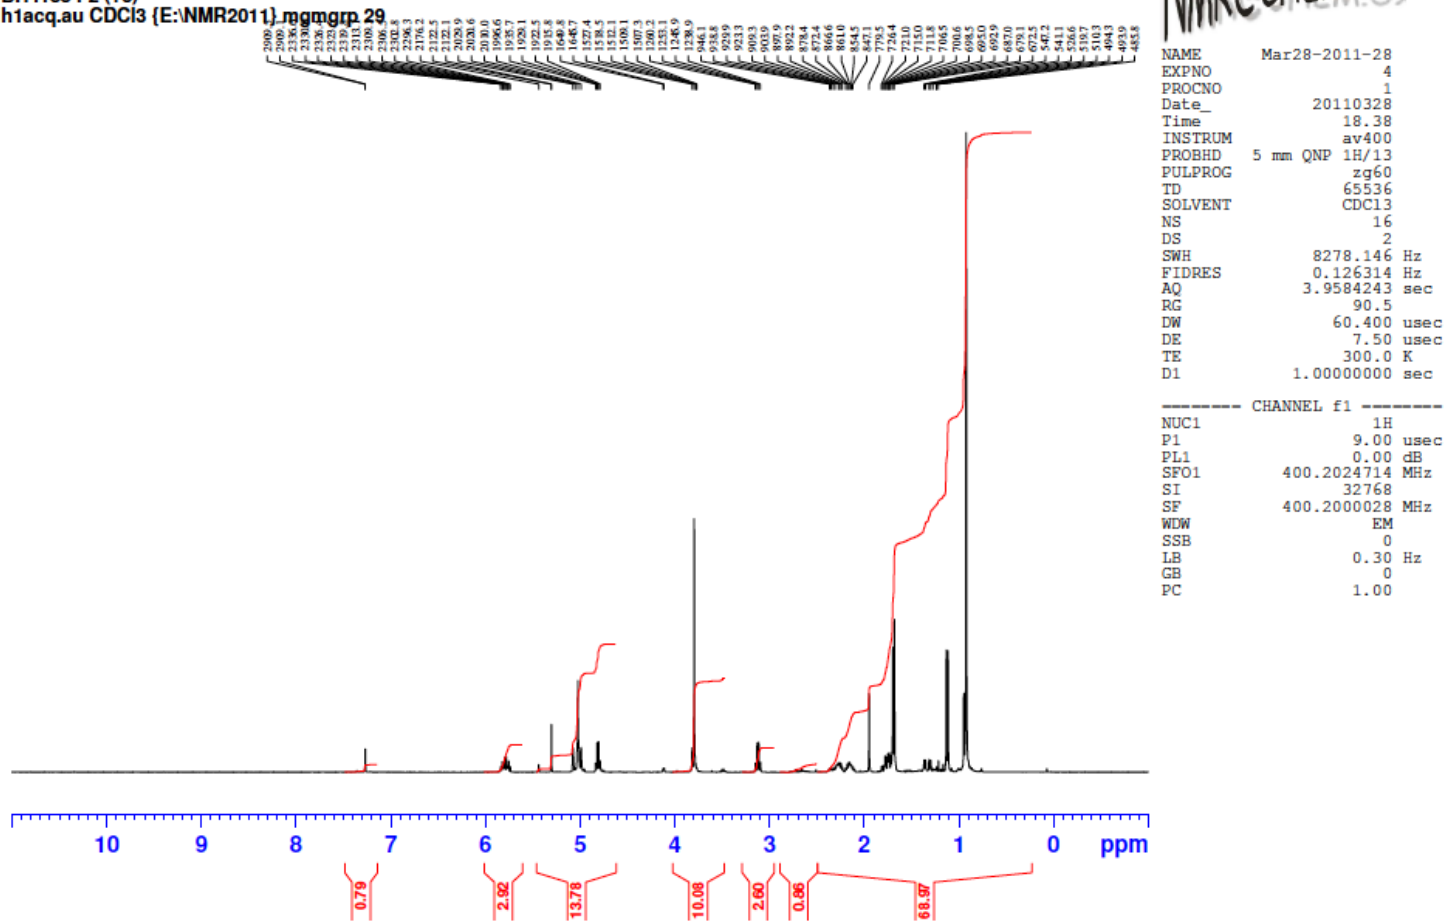

22g

Instrument DQX400  
 Chemist BH  
 Group MGM  
 BH4188 F2 (+3)  
 c13acq.au CDC13 (E:NMR2011) mgmgrp 28

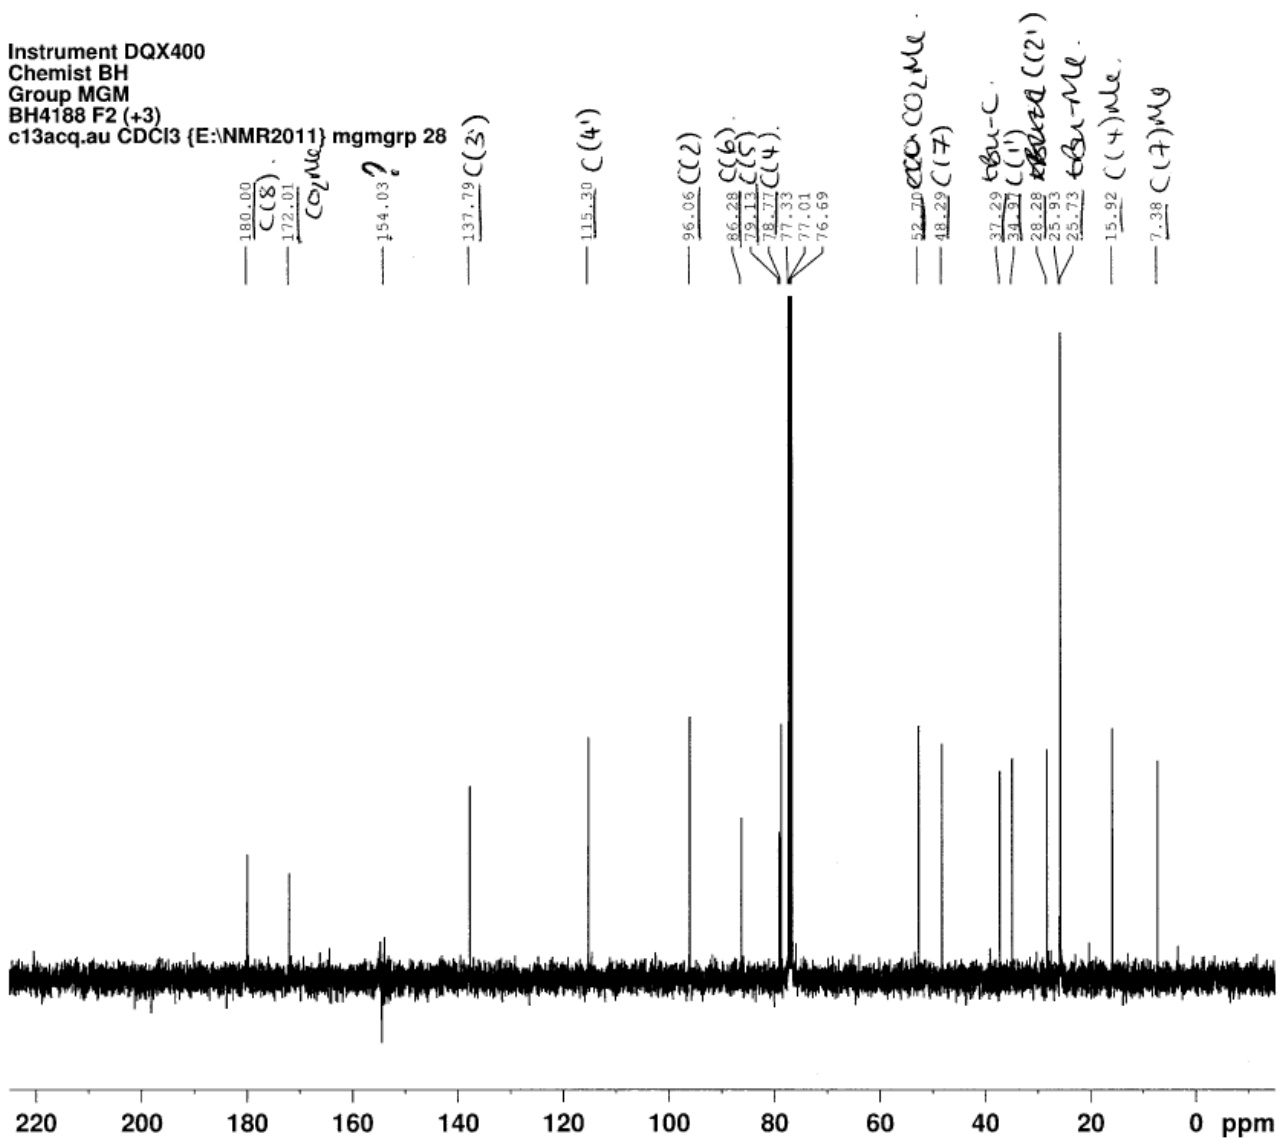

NMROCHEM.OX

NAME Mar29-2011-26  
 EXPNO 3  
 PROCNO 1  
 Date\_ 20110329  
 Time 15.51  
 INSTRUM av400  
 PROBHD 5 mm QNP 1H/13  
 PULPROG zgpg30  
 TD 32768  
 SOLVENT CDC13  
 NS 256  
 DS 4  
 SWH 26178.010  
 FIDRES 0.798889  
 AQ 0.6259188  
 RG 32768  
 DW 19.100  
 DE 7.50  
 TE 300.0  
 D1 1.0000000  
 D11 0.0300000  
 TDO 1

==== CHANNEL f1 ====  
 NUC1 13C  
 P1 9.50  
 PL1 0.00  
 SFO1 100.6403931

==== CHANNEL f2 ====  
 CPDPRG2 waltz16  
 NUC2 1H  
 PCPD2 80.00  
 PL2 0.00  
 PL12 19.00  
 PL13 25.00  
 SFO2 400.2016008  
 S1 32768  
 SF 100.6303718  
 WDW EM  
 SSB 0  
 LB 1.00  
 GB 0  
 PC 1.40

22h

Instrument DQX400  
Chemist BH  
Group MGM  
BH4178

h1acc au CDCl3 (F:NMR2011) mgmgrp 24

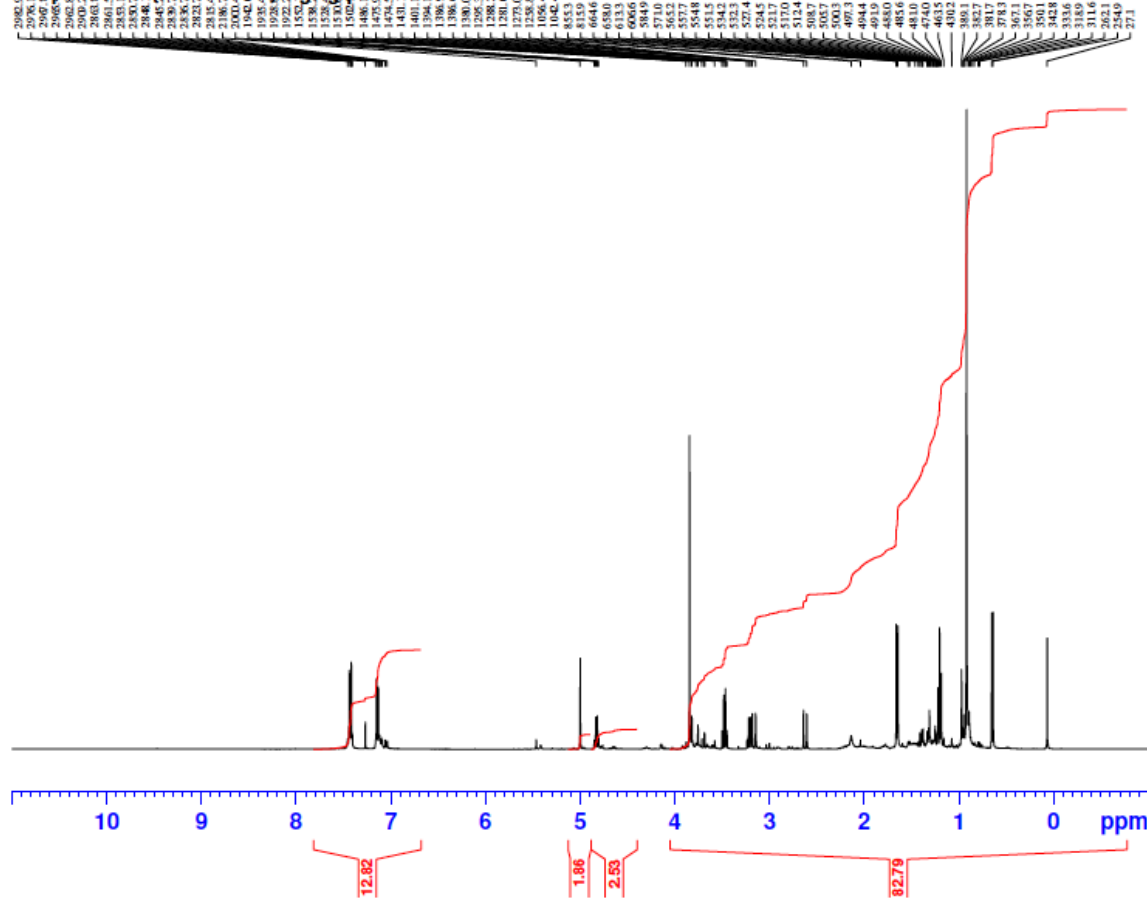

NMRCHEM.OX

NAME Mar09-2011-24  
EXPNO 1  
PROCNO 1  
Date\_ 20110309  
Time 18.51  
INSTRUM av400  
PROBHD 5 mm QNP 1H/13  
PULPROG zg60  
TD 65536  
SOLVENT CDCl3  
NS 16  
DS 2  
SWH 8278.146 Hz  
FIDRES 0.126314 Hz  
AQ 3.9584243 sec  
RG 40.3  
DW 60.400 usec  
DE 7.50 usec  
TE 300.0 K  
D1 1.00000000 sec

----- CHANNEL f1 -----  
NUC1 1H  
P1 9.00 usec  
PL1 0.00 dB  
SFO1 400.2024714 MHz  
SI 32768  
SF 400.2000028 MHz  
WDW EM  
SSB 0  
LB 0.30 Hz  
GB 0  
PC 1.00

22h

Instrument DQX400  
Chemist BH  
Group MGM  
BH4178  
c13acq.au CDC13 (E:\NMR2011) mgmgrp 24

NMR@CHEM.OX

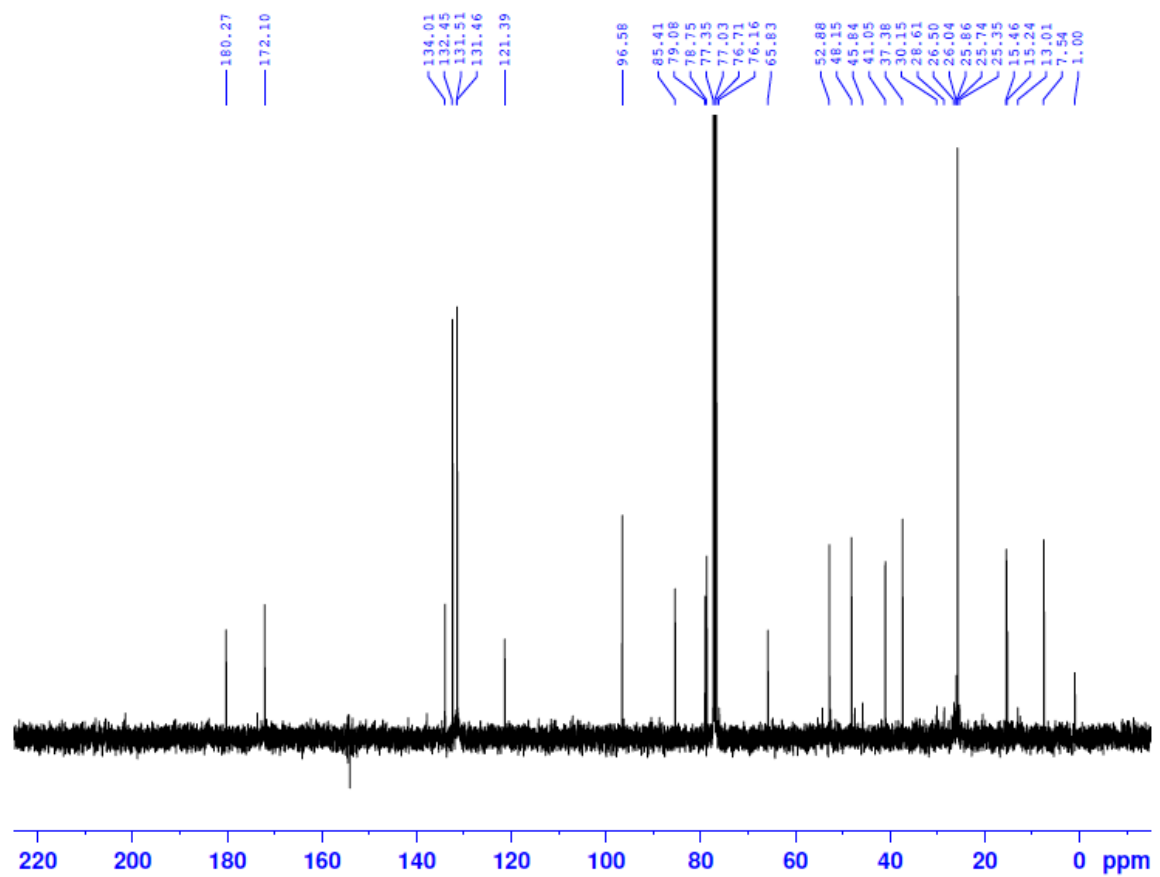

```
NAME Mar09-2011-24
EXPNO 2
PROCNO 1
Date_ 20110309
Time 18.59
INSTRUM av400
PROBHD 5 mm QNP 1H/13
PULPROG zgpg30
TD 32768
SOLVENT CDC13
NS 256
DS 4
SWH 26178.010 Hz
FIDRES 0.798889 Hz
AQ 0.6259188 sec
RG 32768
DW 19.100 usec
DE 7.50 usec
TE 300.0 K
D1 1.00000000 sec
D11 0.03000000 sec
TD0 1

----- CHANNEL f1 -----
NUC1 13C
P1 9.50 usec
PL1 0.00 dB
SFO1 100.6403931 MHz

----- CHANNEL f2 -----
CPDPRG2 waltz16
NUC2 1H
PCPD2 80.00 usec
PL2 0.00 dB
PL12 19.00 dB
PL13 25.00 dB
SFO2 400.2016008 MHz
SI 32768
SF 100.6303718 MHz
WDW EM
SSB 0
LB 1.00 Hz
GB 0
PC 1.40
```



Instrument DQX400  
 Chemist BH  
 Group MGM  
 BH4184  
 h1acq.au CDCl3 {E:NMR2011} mgmgrp\_5

NMRCHEM.OX

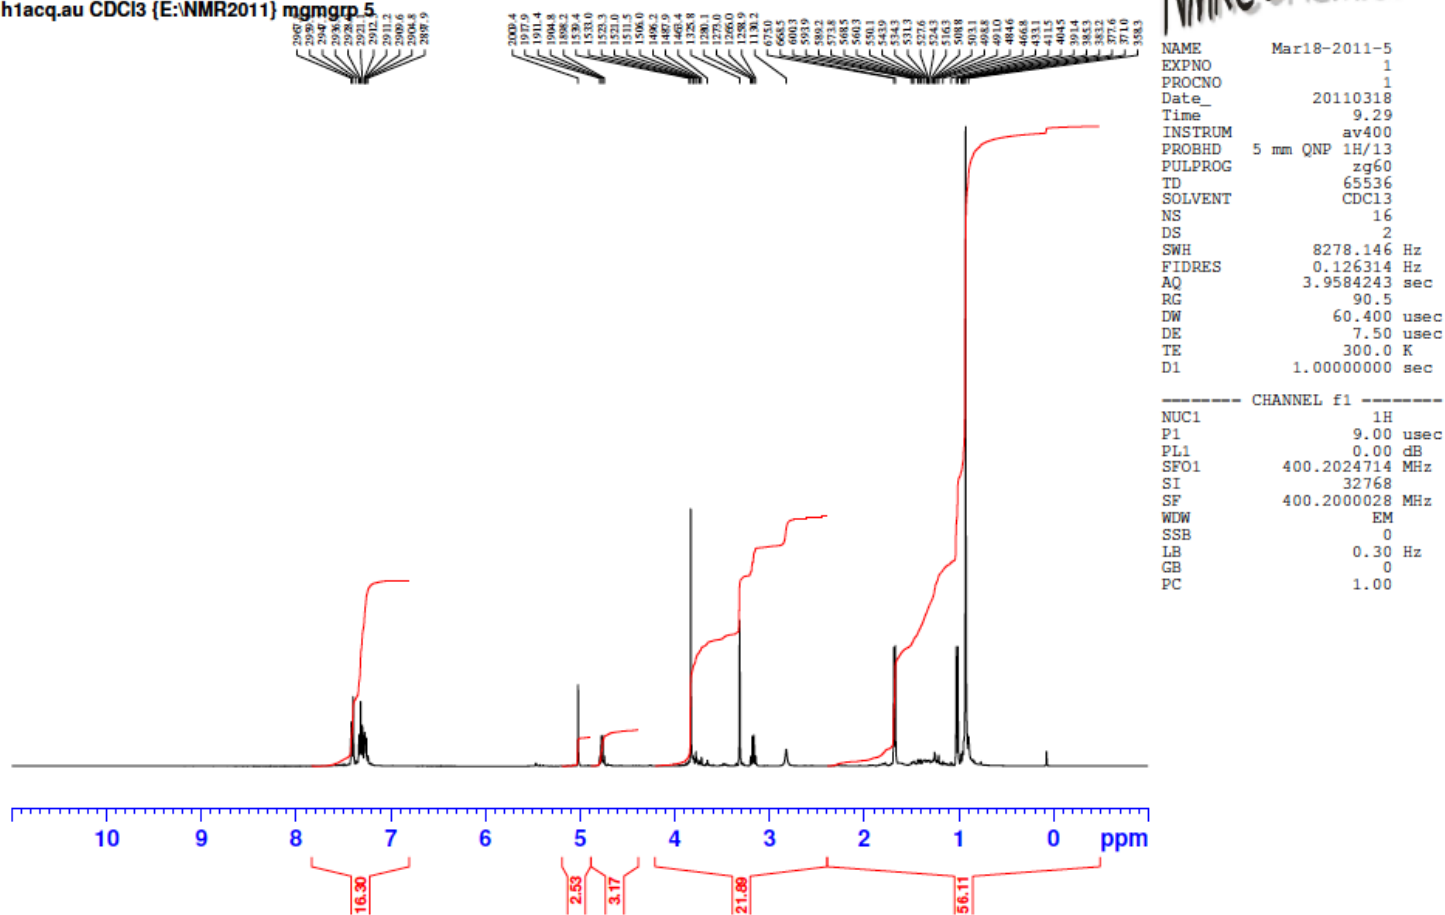

Instrument AVC500  
 Group MGM  
 57 Beth Heaviside 22/3/11

NMR@CHEM.OX

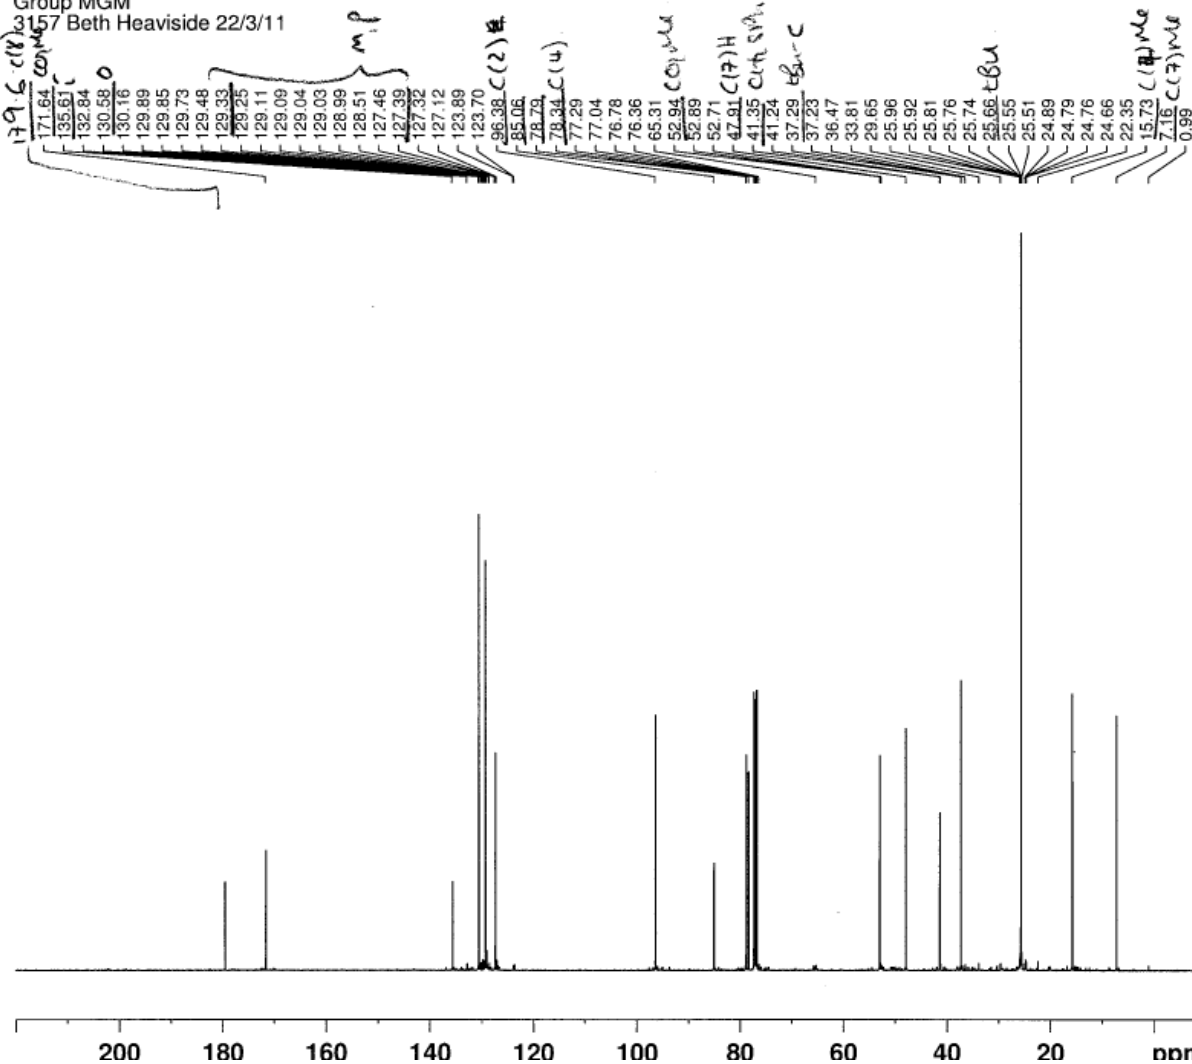

```

NAME          bh31572203
EXPNO         3
PROCNO        1
Date_         20110323
Time          0.41
INSTRUM       avc500
PROBHD        5 mm CPDUL 13C
PULPROG       zgpg30
TD            65536
SOLVENT       CDCl3
NS            512
DS            2
SWH           31250.000 Hz
FIDRES        0.476837 Hz
AQ            1.0486259 sec
RG            1820
DW            16.000 usec
DE            20.00 usec
TE            298.1 K
D1            2.00000000 sec
D11           0.03000000 sec
TD0           1

----- CHANNEL f1 -----
NUC1          13C
P1            9.50 usec
PL1           -4.40 dB
PL1W         28.15752029 W
SFO1         125.8131151 MHz

----- CHANNEL f2 -----
CPDPRG2      waltz16
NUC2          1H
PCPD2        80.00 usec
PL2           -6.00 dB
PL12         12.42 dB
PL13         18.42 dB
PL2W         15.19999981 W
PL12W        0.21869738 W
PL13W        0.05493430 W
SFO2         500.3020012 MHz
SI           32768
SF           125.8005438 MHz
WDW          EM
SSB          0
LB           1.00 Hz
GB           0
PC           1.40
    
```

22j

Instrument DQX400  
Chemist BH  
Group MGM  
BH426 F4

h1acq.au CDCl3 (C;NMB) mgmgrp 2

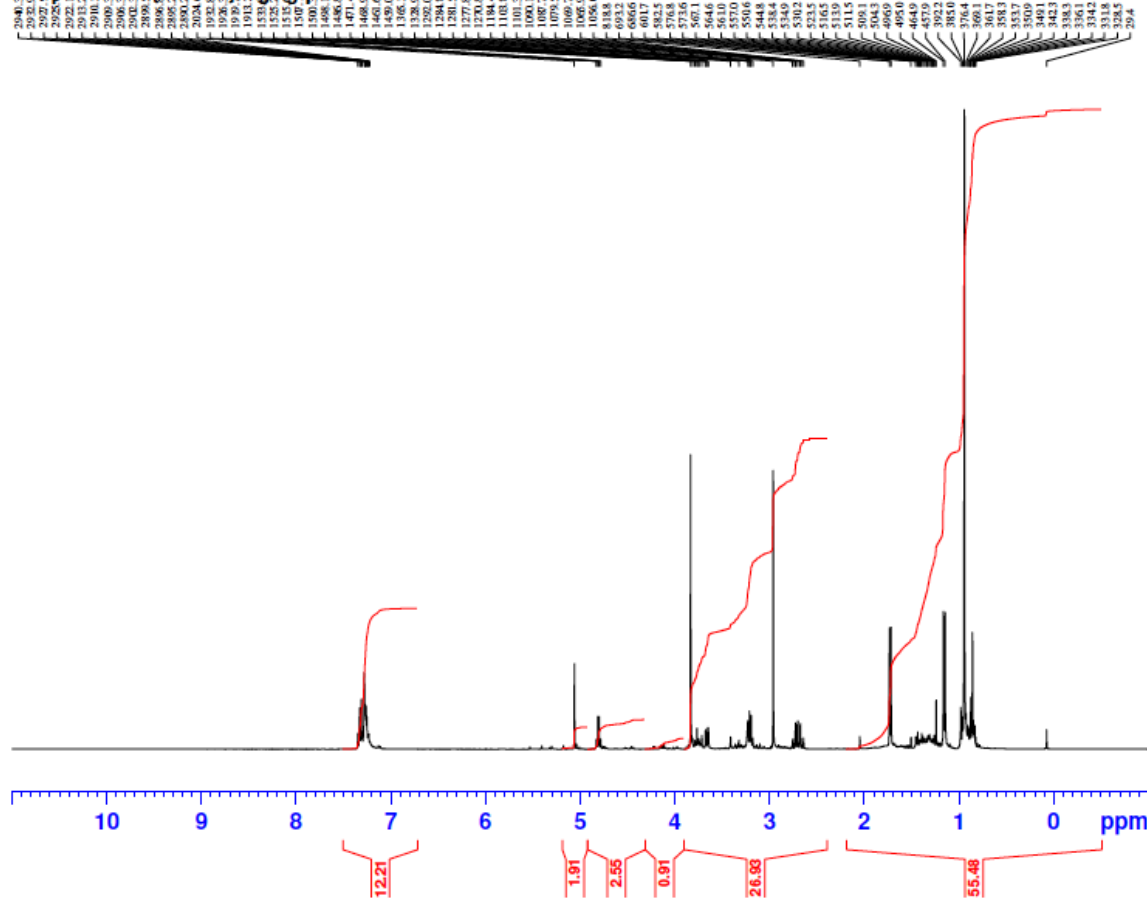

NMROCHEM.OX

```
NAME Sep20-2010-2
EXPNO 1
PROCNO 1
Date_ 20100920
Time 9.05
INSTRUM av400
PROBHD 5 mm QNP 1H/13
PULPROG zg60
TD 65536
SOLVENT CDCl3
NS 16
DS 2
SWH 8278.146 Hz
FIDRES 0.126314 Hz
AQ 3.9584243 sec
RG 40.3
DW 60.400 usec
DE 7.50 usec
TE 300.0 K
D1 1.00000000 sec

----- CHANNEL f1 -----
NUC1 1H
P1 9.00 usec
PL1 0.00 dB
SFO1 400.2024714 MHz
SI 32768
SF 400.2000028 MHz
WDW EM
SSB 0
LB 0.30 Hz
GB 0
PC 1.00
```

22j

Instrument DQX400  
Chemist BH  
Group MGM  
BH426 F4  
c13acq.au CDCl3 (C13NMR) mgmgrp 2

NMR@CHEM.OX

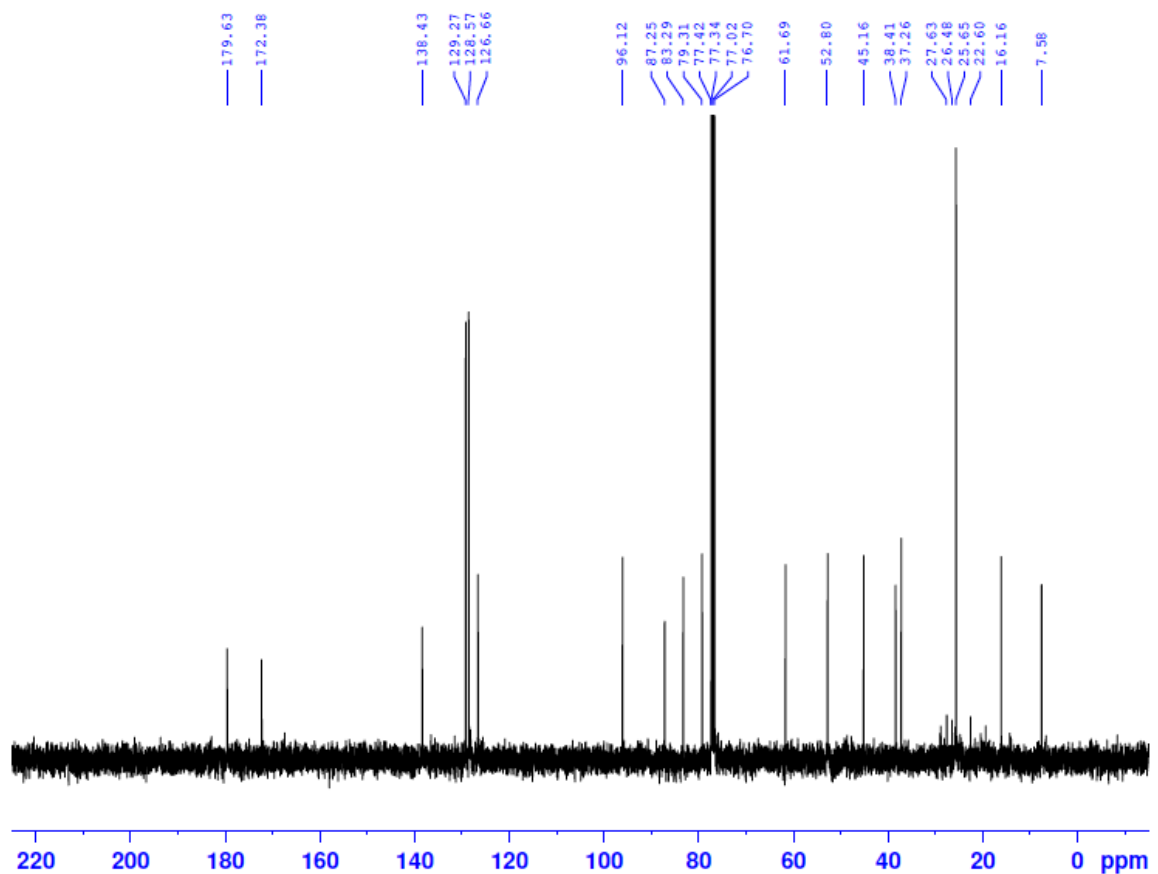

```
NAME Sep20-2010-2
EXPNO 2
PROCNO 1
Date_ 20100920
Time 9.13
INSTRUM av400
PROBHD 5 mm QNP 1H/13
PULPROG zgpg30
TD 32768
SOLVENT CDCl3
NS 256
DS 4
SWH 26178.010 Hz
FIDRES 0.798889 Hz
AQ 0.6259188 sec
RG 32768
DW 19.100 usec
DE 7.50 usec
TE 300.0 K
D1 1.00000000 sec
D11 0.03000000 sec
TDO 1

----- CHANNEL f1 -----
NUC1 13C
P1 9.50 usec
PL1 0.00 dB
SFO1 100.6403931 MHz

----- CHANNEL f2 -----
CPDPRG2 waltz16
NUC2 1H
PCPD2 80.00 usec
PL2 0.00 dB
PL12 19.00 dB
PL13 25.00 dB
SFO2 400.2016008 MHz
SI 32768
SF 100.6303718 MHz
WDW EM
SSB 0
LB 1.00 Hz
GB 0
PC 1.40
```

22j'

Instrument DQX400  
Chemist BH  
Group MGM  
BH426 F3  
h1acq.au CDCl3 (C-NMR) mgmgrp 1

NMROCHEM.OX

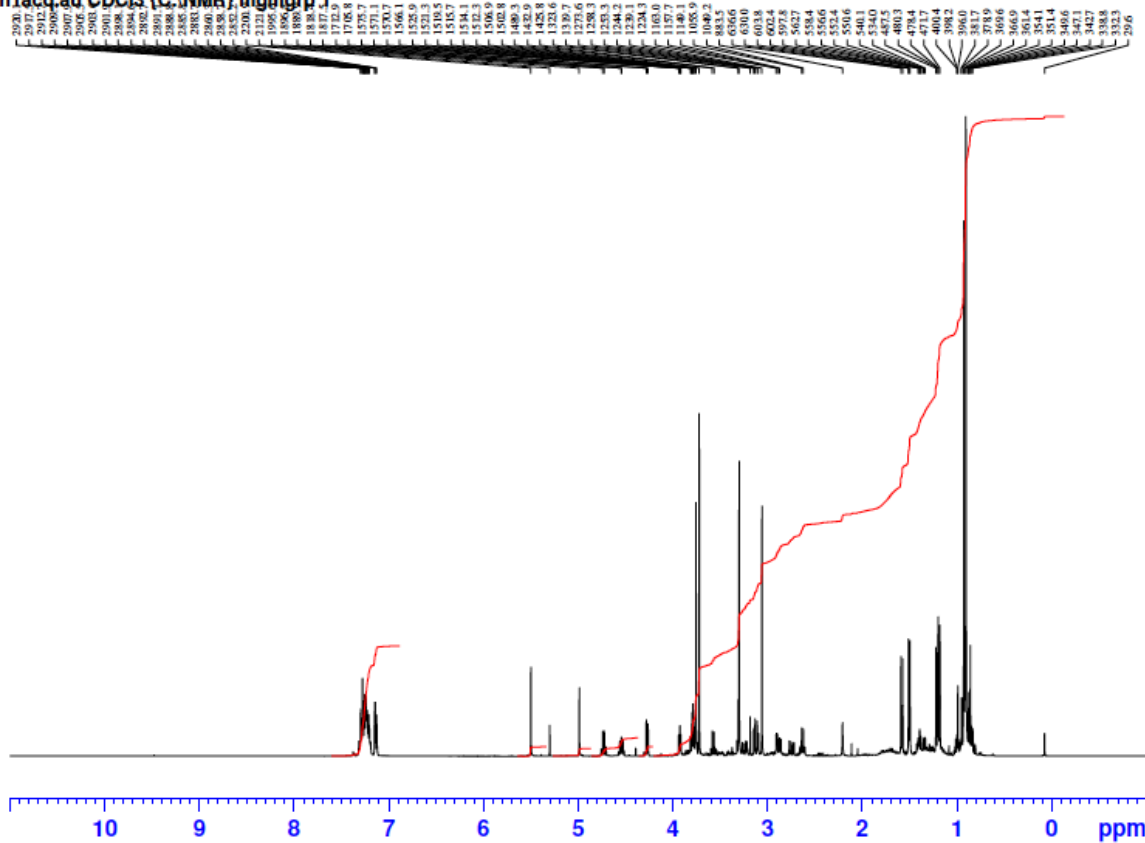

```
NAME          Sep20-2010-1
EXPNO          1
PROCNO         1
Date_          20100920
Time           8.37
INSTRUM        av400
PROBHD         5 mm QNP 1H/13
PULPROG        zg60
TD             65536
SOLVENT        CDCl3
NS             16
DS             2
SWH            8278.146 Hz
FIDRES         0.126314 Hz
AQ             3.9584243 sec
RG             90.5
DW             60.400 usec
DE             7.50 usec
TE             300.0 K
D1             1.00000000 sec

----- CHANNEL f1 -----
NUC1           1H
P1             9.00 usec
PL1            0.00 dB
SFO1           400.2024714 MHz
SI             32768
SF             400.2000028 MHz
WDW            EM
SSB            0
LB             0.30 Hz
GB             0
PC             1.00
```

22j'

Instrument DQX400  
 Chemist BH  
 Group MGM  
 BH426 F3  
 c13acq.au CDCl3 (C13NMR) mgmgrp 1

NMR@CHEM.OX

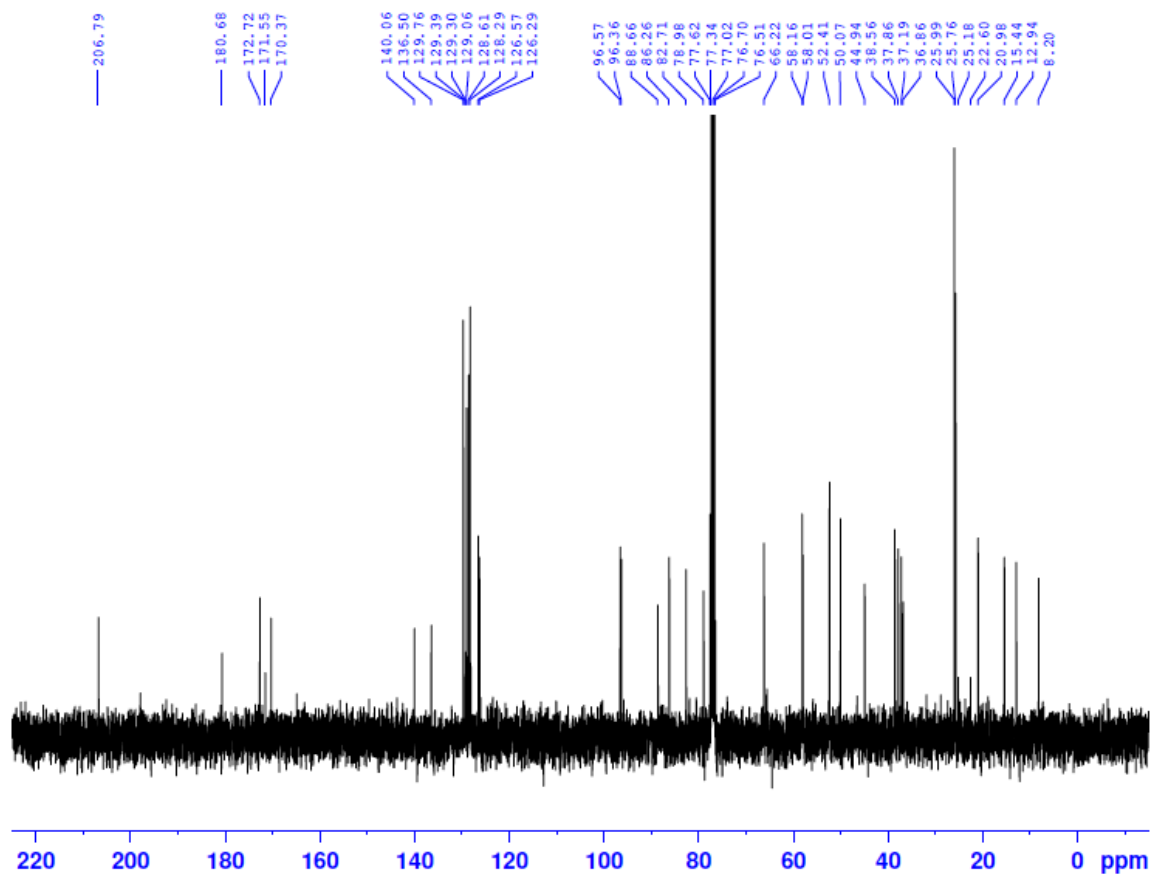

```

NAME          Sep20-2010-1
EXPNO         2
PROCNO        1
Date_         20100920
Time          8.45
INSTRUM       av400
PROBHD        5 mm QNP 1H/13
PULPROG       zgpg30
TD            32768
SOLVENT       CDCl3
NS            256
DS            4
SWH           26178.010 Hz
FIDRES        0.798889 Hz
AQ            0.6259188 sec
RG            32768
DW            19.100 usec
DE            7.50 usec
TE            300.0 K
D1            1.00000000 sec
D11           0.03000000 sec
TD0           1

----- CHANNEL f1 -----
NUC1          13C
P1            9.50 usec
PL1           0.00 dB
SFO1         100.6403931 MHz

----- CHANNEL f2 -----
CPDPRG2      waltz16
NUC2          1H
PCPD2        80.00 usec
PL2           0.00 dB
PL12         19.00 dB
PL13         25.00 dB
SFO2         400.2016008 MHz
SI           32768
SF           100.6303718 MHz
WDW          EM
SSB          0
LB           1.00 Hz
GB           0
PC           1.40
  
```

22k

Instrument AVC500  
Group MGM  
BETH HEAVISIDE 6146 27/9/11

NMRO@CHEM.OX

NAME bh61462709  
EXPNO 1  
PROCNO 1  
Date\_ 20110928  
Time 23.42  
INSTRUM avc500  
PROBHD 5 mm CPDUL 13C  
PULPROG zg30  
TD 65536  
SOLVENT CDCl3  
NS 16  
DS 2  
SWH 10330.578 Hz  
FIDRES 0.157632 Hz  
AQ 3.1719923 sec  
RG 4  
DW 48.400 usec  
DE 6.00 usec  
TE 298.0 K  
D1 1.00000000 sec  
TD0 1

----- CHANNEL f1 -----  
NUC1 1H  
P1 9.60 usec  
PL1 -6.00 dB  
PL1W 15.19999981 W  
SFO1 500.3030896 MHz  
SI 32768  
SF 500.3000240 MHz  
WDW EM  
SSB 0  
LB 0.30 Hz  
GB 0  
PC 1.00

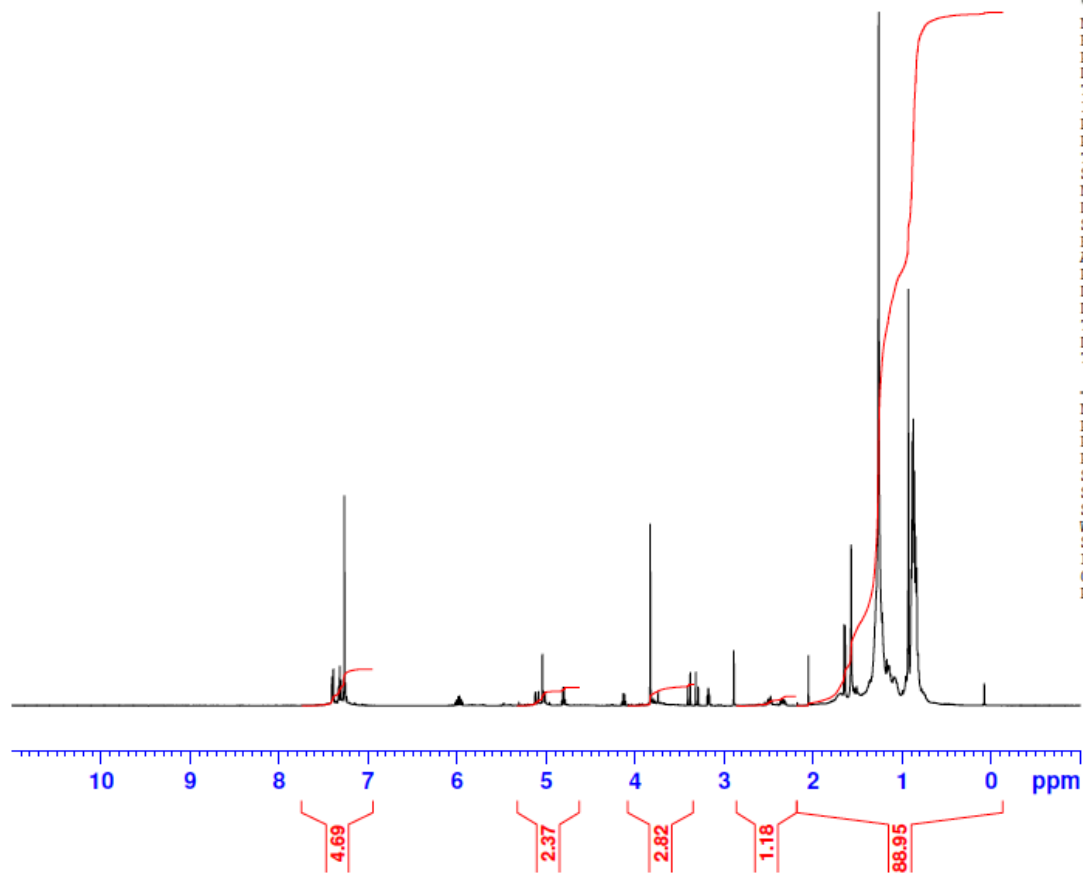

22k

Instrument AVC500  
Group MGM  
BETH HEAVISIDE 6146 27/9/11

NMR@CHEM.OX

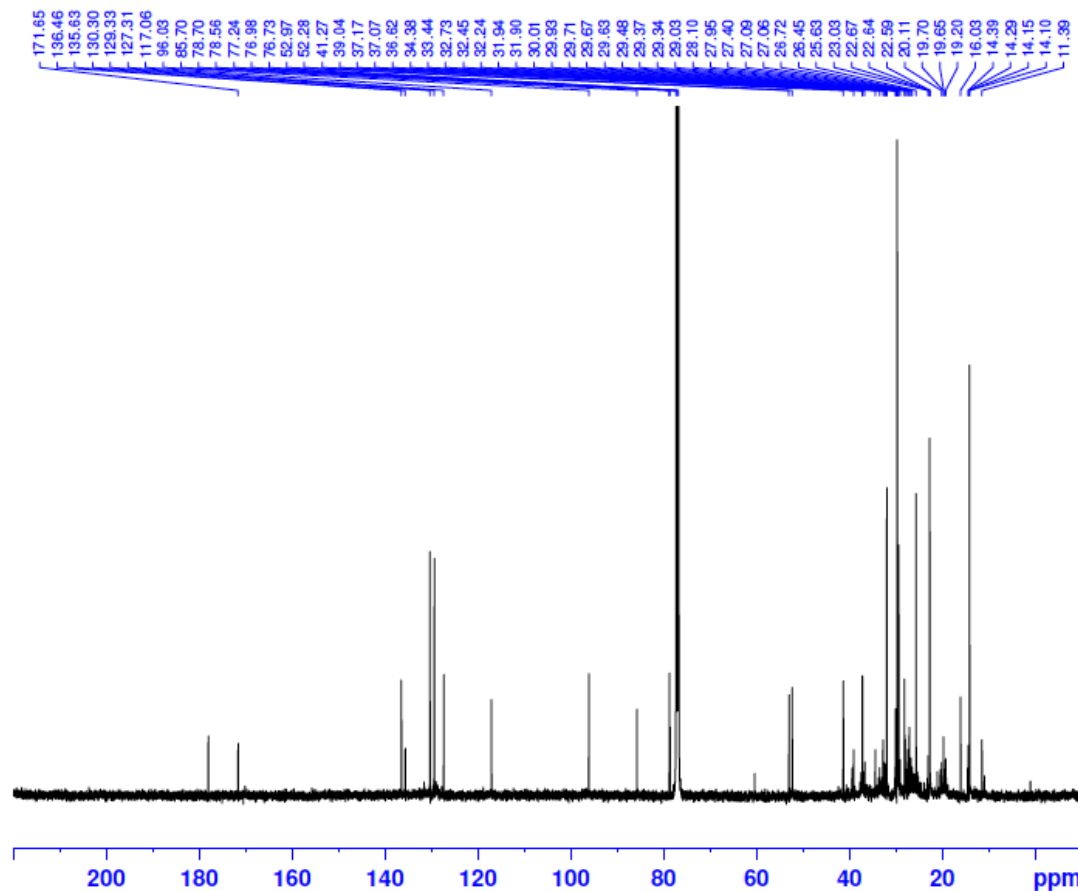

```
NAME          bh61462709
EXPNO         4
PROCNO        1
Date_         20110929
Time          0.52
INSTRUM       avc500
PROBHD        5 mm CPDUL 13C
PULPROG       zgpg30
TD            65536
SOLVENT       CDCl3
NS            1024
DS            2
SWH           31250.000 Hz
FIDRES        0.476837 Hz
AQ            1.0486259 sec
RG            1820
DW            16.000 usec
DE            20.00 usec
TE            298.0 K
D1            2.00000000 sec
D11           0.03000000 sec
TD0           1

----- CHANNEL f1 -----
NUC1          13C
P1            10.00 usec
PL1           -4.40 dB
PL1W          28.15752029 W
SFO1          125.8131151 MHz

----- CHANNEL f2 -----
CPDPRG2       waltz16
NUC2          1H
PCPD2         80.00 usec
PL2           -6.00 dB
PL12          12.42 dB
PL13          18.42 dB
PL2W          15.19999981 W
PL12W         0.21869738 W
PL13W         0.05493430 W
SFO2          500.3020012 MHz
SI            32768
SF            125.8005438 MHz
WDW           EM
SSB           0
LB            1.00 Hz
GB            0
PC            1.40
```



Instrument AVC500  
Group MGM  
BETH HEAVISIDE 6147 27/9/11

NMROCHEM.OX

NAME bh61472709  
EXPNO 1  
PROCNO 1  
Date\_ 20110928  
Time 21.26  
INSTRUM avc500  
PROBHD 5 mm CPDUL 13C  
PULPROG zg30  
TD 65536  
SOLVENT CDCl3  
NS 16  
DS 2  
SWH 10330.578 Hz  
FIDRES 0.157632 Hz  
AQ 3.1719923 sec  
RG 4  
DW 48.400 usec  
DE 6.00 usec  
TE 298.0 K  
D1 1.00000000 sec  
TD0 1

----- CHANNEL f1 -----  
NUC1 1H  
P1 9.60 usec  
PL1 -6.00 dB  
PL1W 15.19999981 W  
SFO1 500.3030896 MHz  
SI 32768  
SF 500.3000240 MHz  
WDW EM  
SSB 0  
LB 0.30 Hz  
GB 0  
PC 1.00

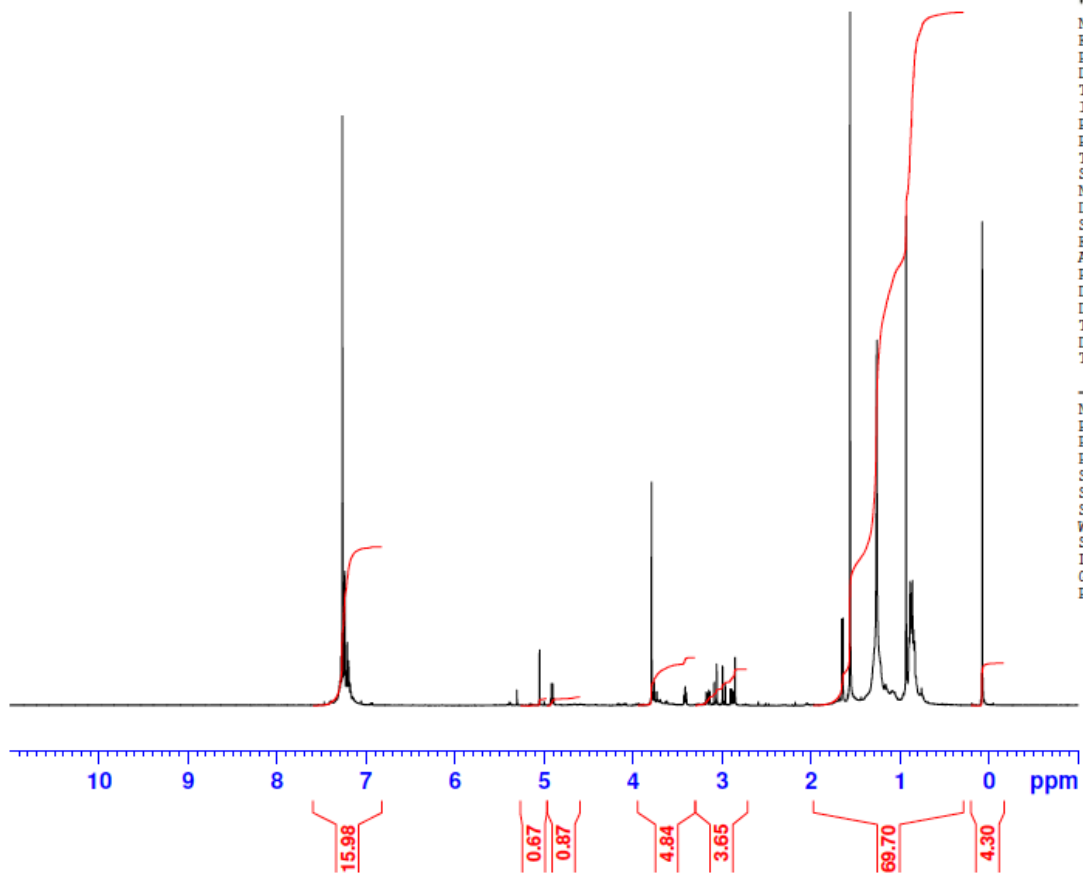

Instrument AVC500  
Group MGM  
BETH HEAVISIDE 6147 27/9/11

NMR@CHEM.OX

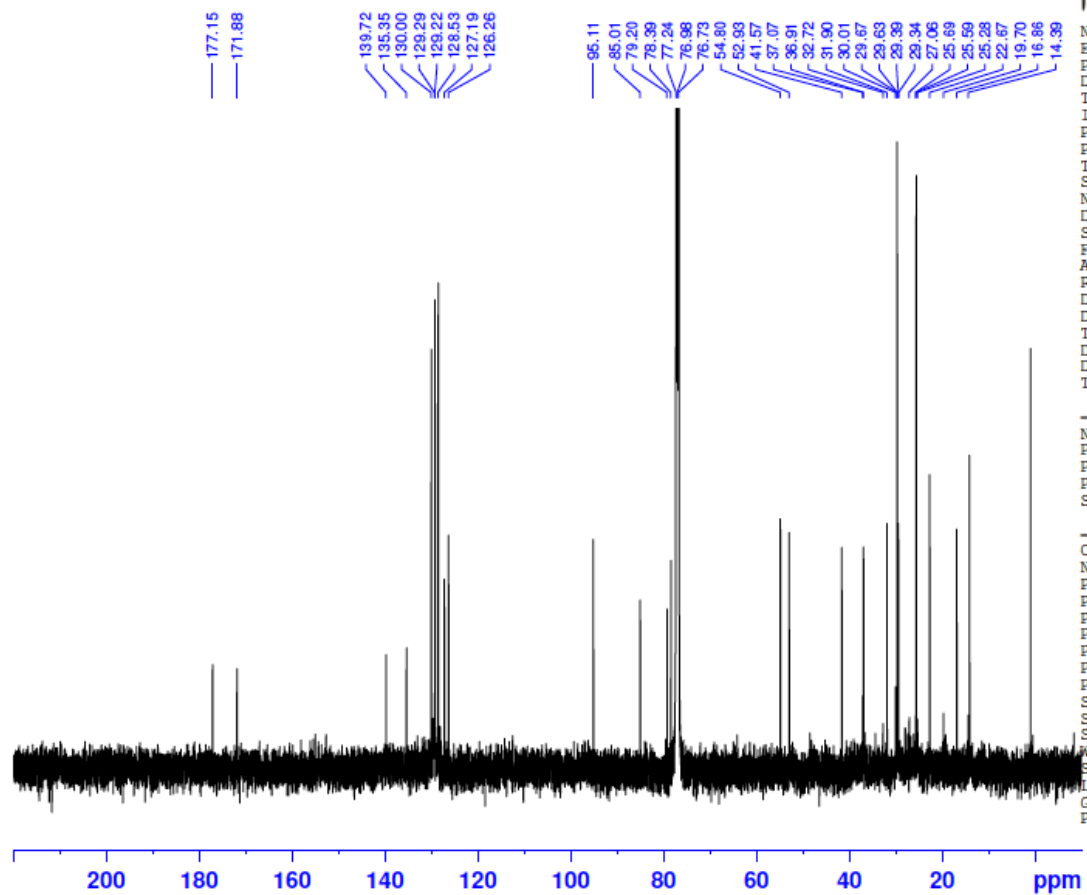

```

NAME          bh61472709
EXPNO         4
PROCNO        1
Date_         20110928
Time          22.36
INSTRUM       avc500
PROBHD        5 mm CPDUL 13C
PULPROG       zgpg30
TD            65536
SOLVENT       CDCl3
NS            1024
DS            2
SWH           31250.000 Hz
FIDRES        0.476837 Hz
AQ            1.0486259 sec
RG            1820
DW            16.000 usec
DE            20.00 usec
TE            298.0 K
D1            2.00000000 sec
D11           0.03000000 sec
TDO           1

----- CHANNEL f1 -----
NUC1          13C
P1            10.00 usec
PL1           -4.40 dB
PL1W          28.15752029 W
SFO1          125.8131151 MHz

----- CHANNEL f2 -----
CPDPRG2       waltz16
NUC2          1H
PCPD2         80.00 usec
PL2           -6.00 dB
PL12          12.42 dB
PL13          18.42 dB
PL2W          15.19999981 W
PL12W         0.21869738 W
PL13W         0.05493430 W
SFO2          500.3020012 MHz
SI            32768
SF            125.8005438 MHz
WDW           EM
SSB           0
LB            1.00 Hz
GB            0
PC            1.40

```
